# Supplementary material for: Comparison of the transcriptome in circulating leukocytes in early lactation between primiparous and multiparous cows provides evidence for age-related changes
Source: PubMed Central journal article supplement (PMC8466696; doi:10.1186/s12864-021-07977-5), 2021-09-25

Supplementary Figure 1. Volcano plot of differentially expressed genes (padj <0.01, LFC>1).

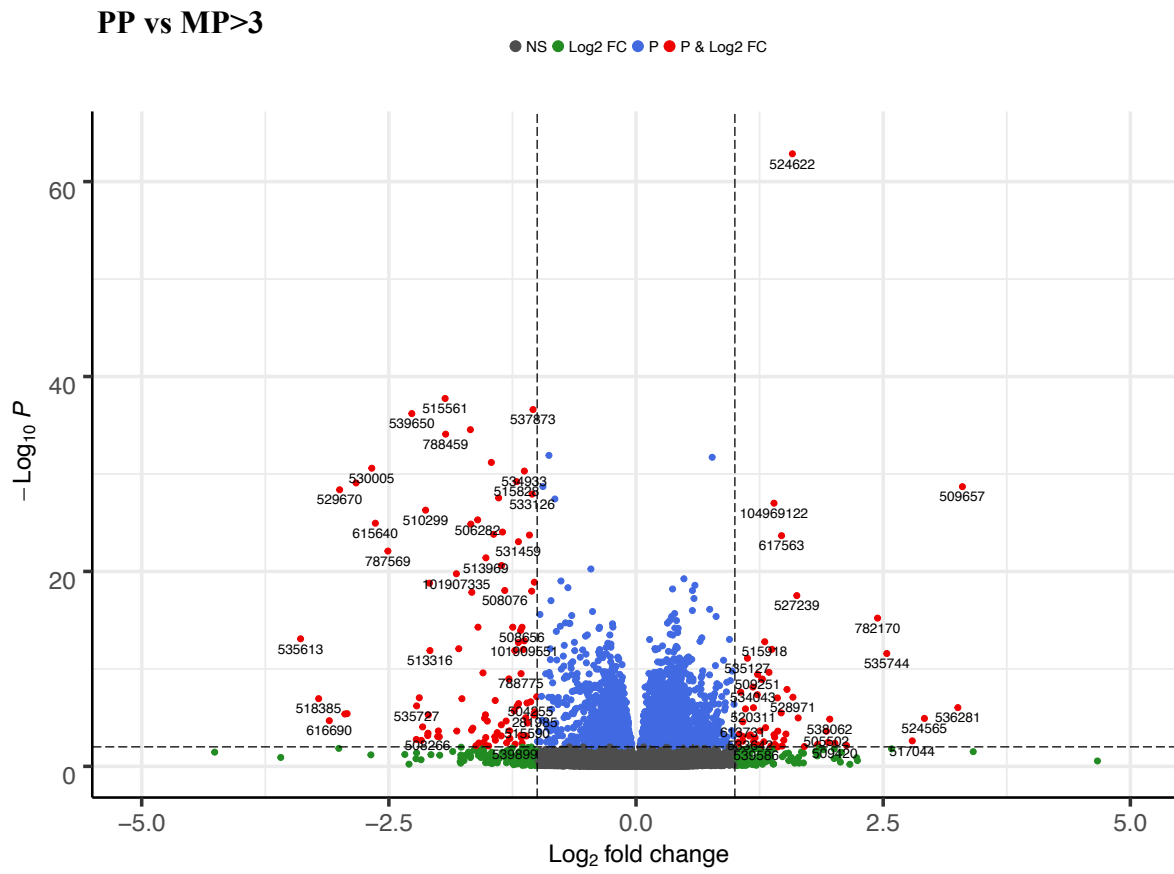

Supplementary Figure 2. Outlier detected by sample clustering (WGCNA).

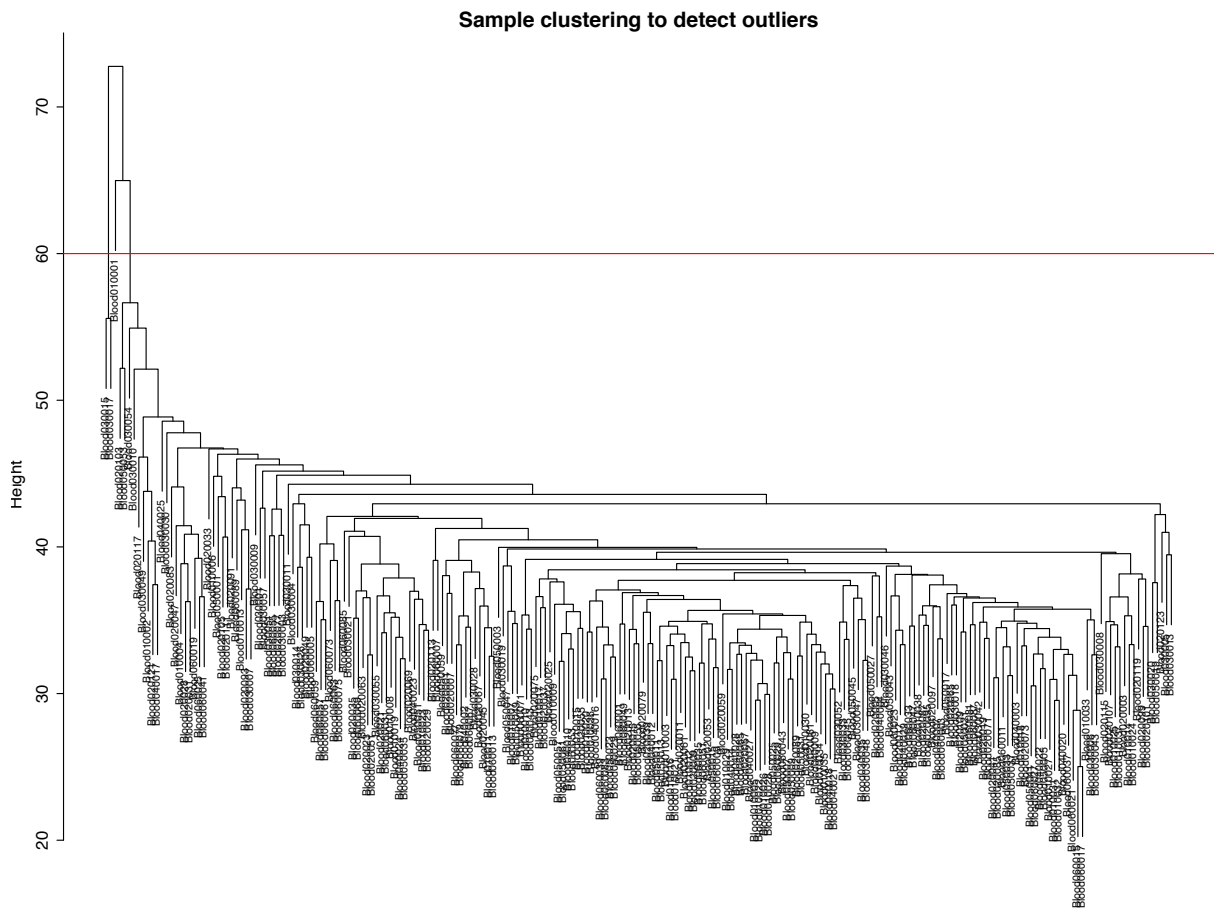

Supplementary Figure 3. Principal component analysis of herd effect. A) with herd effect, B) herd effect removed

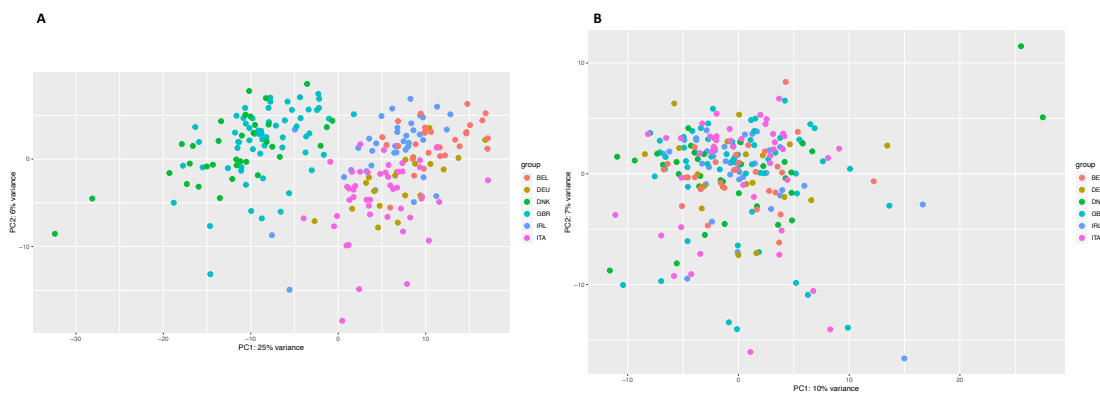

Supplement: 12864_2021_7977_MOESM2_ESM.pdf [file 12864_2021_7977_MOESM2_ESM.pdf]
