# Supplementary material for: Comparison of the transcriptome in circulating leukocytes in early lactation between primiparous and multiparous cows provides evidence for age-related changes
Source: BMC Genomics. 2021 Sep 25;22:693. doi: 10.1186/s12864-021-07977-5 (PMC8466696; doi:10.1186/s12864-021-07977-5)
Supplement: Supplementary file 1 — Additional file 1: Additional tables supporting the main text of the manuscript. Referred to as Supplementary Tables 1–6. Supplementary Table 1. Milk yield data (kg/d) for the six dairy herds used in the study, organised by herd and parity. Supplementary Table 2. Mapping rate of all blood samples against the Bos taurus reference ARS-UCD1.2 and summary statistics. Supplementary Table 3. Gene ontology enrichment analysis of genes in significantly correlated modules. Supplementary Table 4. David functional cluster analysis of genes in significantly correlated modules. Supplementary Table 5A, 5B. (i) Top six most significant clusters; (ii) Number of genes highly expressed in the PP/MP3 cows per cluster. Supplementary Table 6. RNA concentration measured with Nanodrop, Bioanalyzer, and RIN values. [file 12864_2021_7977_MOESM1_ESM.xlsx]

## Sheet: Supplementary Table 1
Supplementary Table 1. Milk yield data (kg/d) for the six dairy herds used in the study, organised by herd and parity.
	n	Week 1	Week 2
Herd*
GBR	61	28.3 ± 1.01	30.8 ± 1.16ab
DNK	33	28.1 ± 1.48	33.7 ± 1.64ab
ITA	45	25.9 ± 1.13	28.6 ± 1.07a
BEL	30	27.7 ± 1.57	30.7 ± 1.60ab
DEU	19	32.9 ± 1.45	36.1 ± 2.47b
IRL	38	29.1 ± 1.25	30.5 ± 1.09ab
Lactation No.#
PP	53	20.3 ± 0.82d	23.5 ± 0.88d
MP2-3	120	31.0 ± 0.54e	33.8 ± 0.68e
MP>3	53	30.0 ± 1.14e	33.0 ± 1.14e
All	226	28.1 ± 0.53	31.1 ± 0.57
*GBR: Agri-Food and Biosciences Institute Hillsborough, Northern Ireland; DNK: Aarhus University, Denmark; ITA: Consiglio per la Ricerca in Agricoltura e l’Analsi dell’Economia Agraria, Italy;
BEL: Walloon Agricultural Centre, Belgium; DEU: Leibniz Institute for Farm Animal Biology, Germany; IRL: University College Dublin, Ireland.
#PP, primiparous; MP, multiparous.
Data were obtained during the first two weeks of lactation at 7.7 ± 0.1 and 14.3 ± 0.1 days in milk and are presented as mean ± SEM. Within columns a<b P<0.05, a<c P<0.01, d<e P<0.001.

## Sheet: Supplementary Table 2
Supplementary Table 2. Mapping rate of all blood samples (PRJNA749896) against the Bos taurus reference ARS-UCD1.2 and sumamry statistics. Abbreviation are as follows: primiparous (PP), multiparous (MP2-3, MP>3).
BioProject	BioSample	Run	BioSamples	Sample	Parity	Total reads	Mapped reads	Alignment rate (%)			Avg_alignment_rate	Avg_total_reads	smallestNumberReads	biggerNumberReads
PRJNA749896	SAMN20424637	SRR15254971	SAMN20424637	Blood010001	MP>3	39028181	37661847	0.965			0.962537	3.44395e+07	26480444	44800143
PRJNA749896	SAMN20424638	SRR15254970	SAMN20424638	Blood010002	MP>3	26480444	25733111	0.9718
PRJNA749896	SAMN20424639	SRR15254859	SAMN20424639	Blood010003	MP>3	31393072	30526308	0.9724
PRJNA749896	SAMN20424640	SRR15254819	SAMN20424640	Blood010004	MP>3	39526408	38195292	0.9663
PRJNA749896	SAMN20424641	SRR15254808	SAMN20424641	Blood010005	MP>3	39525974	38098444	0.9639
PRJNA749896	SAMN20424642	SRR15254797	SAMN20424642	Blood010006	MP>3	42537202	41010054	0.9641
PRJNA749896	SAMN20424643	SRR15254786	SAMN20424643	Blood010007	MP>3	35392425	34353200	0.9706
PRJNA749896	SAMN20424644	SRR15254775	SAMN20424644	Blood010008	MP>3	40883455	39470531	0.9654
PRJNA749896	SAMN20424645	SRR15254764	SAMN20424645	Blood010009	MP2-3	30214289	29352555	0.9715
PRJNA749896	SAMN20424646	SRR15254753	SAMN20424646	Blood010010	MP>3	34150953	32903673	0.9635
PRJNA749896	SAMN20424647	SRR15254969	SAMN20424647	Blood010011	MP>3	38820536	37461791	0.965
PRJNA749896	SAMN20424648	SRR15254958	SAMN20424648	Blood010012	MP>3	33349246	32436383	0.9726
PRJNA749896	SAMN20424649	SRR15254947	SAMN20424649	Blood010013	MP>3	30824139	29943752	0.9714
PRJNA749896	SAMN20424650	SRR15254936	SAMN20424650	Blood010014	MP>3	29290341	28443842	0.9711
PRJNA749896	SAMN20424651	SRR15254925	SAMN20424651	Blood010015	MP>3	32255057	31409584	0.9738
PRJNA749896	SAMN20424652	SRR15254914	SAMN20424652	Blood010016	MP2-3	33118372	32147907	0.9707
PRJNA749896	SAMN20424653	SRR15254903	SAMN20424653	Blood010017	MP2-3	32002267	31102604	0.9719
PRJNA749896	SAMN20424654	SRR15254892	SAMN20424654	Blood010018	MP2-3	37120021	35753201	0.9632
PRJNA749896	SAMN20424655	SRR15254881	SAMN20424655	Blood010019	MP2-3	40689200	39329471	0.9666
PRJNA749896	SAMN20424656	SRR15254870	SAMN20424656	Blood010020	MP2-3	41338862	39909435	0.9654
PRJNA749896	SAMN20424657	SRR15254858	SAMN20424657	Blood010021	MP2-3	32734241	31827009	0.9723
PRJNA749896	SAMN20424658	SRR15254847	SAMN20424658	Blood010022	MP2-3	40321445	38882909	0.9643
PRJNA749896	SAMN20424659	SRR15254836	SAMN20424659	Blood010023	MP2-3	31223265	30392718	0.9734
PRJNA749896	SAMN20424660	SRR15254826	SAMN20424660	Blood010024	MP2-3	32886298	31974849	0.9723
PRJNA749896	SAMN20424661	SRR15254825	SAMN20424661	Blood010025	MP2-3	32830711	31952719	0.9733
PRJNA749896	SAMN20424662	SRR15254824	SAMN20424662	Blood010026	MP2-3	44800143	43259213	0.9656
PRJNA749896	SAMN20424663	SRR15254823	SAMN20424663	Blood010027	MP2-3	40554611	39137651	0.9651
PRJNA749896	SAMN20424664	SRR15254822	SAMN20424664	Blood010028	MP2-3	39977946	38505423	0.9632
PRJNA749896	SAMN20424665	SRR15254821	SAMN20424665	Blood010029	MP2-3	38267009	36935921	0.9652
PRJNA749896	SAMN20424666	SRR15254820	SAMN20424666	Blood010030	MP2-3	35948798	34785099	0.9676
PRJNA749896	SAMN20424667	SRR15254818	SAMN20424667	Blood010031	MP2-3	35762061	34589541	0.9672
PRJNA749896	SAMN20424668	SRR15254817	SAMN20424668	Blood010032	MP2-3	35406517	34258452	0.9676
PRJNA749896	SAMN20424669	SRR15254816	SAMN20424669	Blood010033	MP2-3	37766575	36177628	0.9579
PRJNA749896	SAMN20424670	SRR15254815	SAMN20424670	Blood010034	MP2-3	39088940	37811835	0.9673
PRJNA749896	SAMN20424671	SRR15254814	SAMN20424671	Blood010035	MP2-3	42708905	41208689	0.9649
PRJNA749896	SAMN20424672	SRR15254813	SAMN20424672	Blood010036	PP	32391825	31333480	0.9673
PRJNA749896	SAMN20424673	SRR15254812	SAMN20424673	Blood010037	PP	32531173	31561360	0.9702
PRJNA749896	SAMN20424674	SRR15254811	SAMN20424674	Blood010038	PP	41029508	39732297	0.9684
PRJNA749896	SAMN20424675	SRR15254810	SAMN20424675	Blood020001	MP>3	38462203	36161153	0.9402
PRJNA749896	SAMN20424676	SRR15254809	SAMN20424676	Blood020003	MP>3	32509004	31530270	0.9699
PRJNA749896	SAMN20424677	SRR15254807	SAMN20424677	Blood020005	MP>3	39859404	38362273	0.9624
PRJNA749896	SAMN20424678	SRR15254806	SAMN20424678	Blood020007	MP>3	39598182	38146981	0.9634
PRJNA749896	SAMN20424679	SRR15254805	SAMN20424679	Blood020009	MP>3	32479629	31418969	0.9673
PRJNA749896	SAMN20424680	SRR15254804	SAMN20424680	Blood020011	MP>3	31939653	30947578	0.9689
PRJNA749896	SAMN20424681	SRR15254803	SAMN20424681	Blood020013	MP>3	39613044	33565545	0.8473
PRJNA749896	SAMN20424682	SRR15254802	SAMN20424682	Blood020015	MP>3	30756290	29319542	0.9533
PRJNA749896	SAMN20424683	SRR15254801	SAMN20424683	Blood020017	MP>3	34053023	32963611	0.968
PRJNA749896	SAMN20424684	SRR15254800	SAMN20424684	Blood020019	MP>3	33843183	32821105	0.9698
PRJNA749896	SAMN20424685	SRR15254799	SAMN20424685	Blood020021	MP>3	38079298	36727288	0.9645
PRJNA749896	SAMN20424686	SRR15254798	SAMN20424686	Blood020023	MP>3	36843269	35426764	0.9616
PRJNA749896	SAMN20424687	SRR15254796	SAMN20424687	Blood020025	MP>3	33211982	32196367	0.9694
PRJNA749896	SAMN20424688	SRR15254795	SAMN20424688	Blood020028	MP>3	36698970	35266934	0.961
PRJNA749896	SAMN20424689	SRR15254794	SAMN20424689	Blood020029	MP2-3	32474025	31448569	0.9684
PRJNA749896	SAMN20424690	SRR15254793	SAMN20424690	Blood020031	MP2-3	38098435	36402828	0.9555
PRJNA749896	SAMN20424691	SRR15254792	SAMN20424691	Blood020033	MP2-3	36692601	23145874	0.6308
PRJNA749896	SAMN20424692	SRR15254791	SAMN20424692	Blood020035	MP2-3	37442272	35954091	0.9603
PRJNA749896	SAMN20424693	SRR15254790	SAMN20424693	Blood020037	MP2-3	33977497	32963549	0.9702
PRJNA749896	SAMN20424694	SRR15254789	SAMN20424694	Blood020039	MP2-3	33351612	32290052	0.9682
PRJNA749896	SAMN20424695	SRR15254788	SAMN20424695	Blood020041	MP2-3	31944571	30908967	0.9676
PRJNA749896	SAMN20424696	SRR15254787	SAMN20424696	Blood020043	MP2-3	37487503	36019856	0.9608
PRJNA749896	SAMN20424697	SRR15254785	SAMN20424697	Blood020045	MP2-3	37152595	35729578	0.9617
PRJNA749896	SAMN20424698	SRR15254784	SAMN20424698	Blood020047	MP2-3	38364838	36826859	0.9599
PRJNA749896	SAMN20424699	SRR15254783	SAMN20424699	Blood020049	MP2-3	31998345	30878118	0.965
PRJNA749896	SAMN20424700	SRR15254782	SAMN20424700	Blood020051	MP2-3	38591979	37135773	0.9623
PRJNA749896	SAMN20424701	SRR15254781	SAMN20424701	Blood020053	MP2-3	33166885	32175249	0.9701
PRJNA749896	SAMN20424702	SRR15254780	SAMN20424702	Blood020055	MP2-3	32197796	31177543	0.9683
PRJNA749896	SAMN20424703	SRR15254779	SAMN20424703	Blood020057	MP2-3	38035172	36406515	0.9572
PRJNA749896	SAMN20424704	SRR15254778	SAMN20424704	Blood020059	MP2-3	32489420	31497495	0.9695
PRJNA749896	SAMN20424705	SRR15254777	SAMN20424705	Blood020061	MP2-3	35424709	34306564	0.9684
PRJNA749896	SAMN20424706	SRR15254776	SAMN20424706	Blood020063	MP2-3	36953649	35529498	0.9615
PRJNA749896	SAMN20424707	SRR15254774	SAMN20424707	Blood020065	MP2-3	39121109	37764032	0.9653
PRJNA749896	SAMN20424708	SRR15254773	SAMN20424708	Blood020067	MP2-3	38047296	36718972	0.9651
PRJNA749896	SAMN20424709	SRR15254772	SAMN20424709	Blood020069	MP2-3	33687477	32662896	0.9696
PRJNA749896	SAMN20424710	SRR15254771	SAMN20424710	Blood020071	MP2-3	33109896	32091434	0.9692
PRJNA749896	SAMN20424711	SRR15254770	SAMN20424711	Blood020073	MP2-3	38307722	36957015	0.9647
PRJNA749896	SAMN20424712	SRR15254769	SAMN20424712	Blood020075	MP2-3	33865239	32865327	0.9705
PRJNA749896	SAMN20424713	SRR15254768	SAMN20424713	Blood020077	MP2-3	38985926	36181134	0.9281
PRJNA749896	SAMN20424714	SRR15254767	SAMN20424714	Blood020079	MP2-3	33697637	32572125	0.9666
PRJNA749896	SAMN20424715	SRR15254766	SAMN20424715	Blood020081	MP2-3	38314170	36942330	0.9642
PRJNA749896	SAMN20424716	SRR15254765	SAMN20424716	Blood020083	MP2-3	39424776	38053608	0.9652
PRJNA749896	SAMN20424717	SRR15254763	SAMN20424717	Blood020085	PP	33286804	32274589	0.9696
PRJNA749896	SAMN20424718	SRR15254762	SAMN20424718	Blood020087	PP	34237916	33140777	0.968
PRJNA749896	SAMN20424719	SRR15254761	SAMN20424719	Blood020089	PP	34140116	33086744	0.9691
PRJNA749896	SAMN20424720	SRR15254760	SAMN20424720	Blood020091	PP	31386917	30506807	0.972
PRJNA749896	SAMN20424721	SRR15254759	SAMN20424721	Blood020093	PP	31765381	30897732	0.9727
PRJNA749896	SAMN20424722	SRR15254758	SAMN20424722	Blood020095	PP	37290945	35970154	0.9646
PRJNA749896	SAMN20424723	SRR15254757	SAMN20424723	Blood020097	PP	39078398	37408965	0.9573
PRJNA749896	SAMN20424724	SRR15254756	SAMN20424724	Blood020099	PP	30077241	29144720	0.969
PRJNA749896	SAMN20424725	SRR15254755	SAMN20424725	Blood020101	PP	31075922	30152689	0.9703
PRJNA749896	SAMN20424726	SRR15254754	SAMN20424726	Blood020103	PP	38270537	36955551	0.9656
PRJNA749896	SAMN20424727	SRR15254752	SAMN20424727	Blood020105	PP	38592730	37267903	0.9657
PRJNA749896	SAMN20424728	SRR15254751	SAMN20424728	Blood020107	PP	30886819	29977930	0.9706
PRJNA749896	SAMN20424729	SRR15254750	SAMN20424729	Blood020109	PP	40346836	38741175	0.9602
PRJNA749896	SAMN20424730	SRR15254749	SAMN20424730	Blood020111	PP	37696318	36275004	0.9623
PRJNA749896	SAMN20424731	SRR15254748	SAMN20424731	Blood020113	PP	38862021	37396813	0.9623
PRJNA749896	SAMN20424732	SRR15254747	SAMN20424732	Blood020115	PP	30911554	29970824	0.9696
PRJNA749896	SAMN20424733	SRR15254746	SAMN20424733	Blood020117	PP	31761681	30815942	0.9702
PRJNA749896	SAMN20424734	SRR15254745	SAMN20424734	Blood020119	PP	31103629	30152822	0.9694
PRJNA749896	SAMN20424735	SRR15254744	SAMN20424735	Blood020121	MP>3	39055522	37627228	0.9634
PRJNA749896	SAMN20424736	SRR15254743	SAMN20424736	Blood020123	MP>3	31849676	30911174	0.9705
PRJNA749896	SAMN20424737	SRR15254968	SAMN20424737	Blood030001	MP2-3	36665141	35396933	0.9654
PRJNA749896	SAMN20424738	SRR15254967	SAMN20424738	Blood030003	MP>3	32750776	31676660	0.9672
PRJNA749896	SAMN20424739	SRR15254966	SAMN20424739	Blood030004	MP2-3	33001620	32049669	0.9712
PRJNA749896	SAMN20424740	SRR15254965	SAMN20424740	Blood030005	MP2-3	32673429	31681449	0.9696
PRJNA749896	SAMN20424741	SRR15254964	SAMN20424741	Blood030006	MP2-3	33382503	32327457	0.9684
PRJNA749896	SAMN20424742	SRR15254963	SAMN20424742	Blood030007	PP	34602931	33404338	0.9654
PRJNA749896	SAMN20424743	SRR15254962	SAMN20424743	Blood030008	MP2-3	30482972	26749327	0.8775
PRJNA749896	SAMN20424744	SRR15254961	SAMN20424744	Blood030009	MP2-3	31587862	30584052	0.9682
PRJNA749896	SAMN20424745	SRR15254960	SAMN20424745	Blood030010	MP2-3	30726317	27967126	0.9102
PRJNA749896	SAMN20424746	SRR15254959	SAMN20424746	Blood030011	MP2-3	33250747	32191149	0.9681
PRJNA749896	SAMN20424747	SRR15254957	SAMN20424747	Blood030013	MP2-3	31391930	29271798	0.9325
PRJNA749896	SAMN20424748	SRR15254956	SAMN20424748	Blood030014	MP2-3	38214784	36425324	0.9532
PRJNA749896	SAMN20424749	SRR15254955	SAMN20424749	Blood030015	MP>3	37102426	35737226	0.9632
PRJNA749896	SAMN20424750	SRR15254954	SAMN20424750	Blood030017	MP2-3	36201069	29264180	0.8084
PRJNA749896	SAMN20424751	SRR15254953	SAMN20424751	Blood030018	MP2-3	39118318	36193715	0.9252
PRJNA749896	SAMN20424752	SRR15254952	SAMN20424752	Blood030019	MP>3	36944414	35625538	0.9643
PRJNA749896	SAMN20424753	SRR15254951	SAMN20424753	Blood030020	MP2-3	32841174	31746220	0.9667
PRJNA749896	SAMN20424754	SRR15254950	SAMN20424754	Blood030021	MP2-3	33001951	31846872	0.965
PRJNA749896	SAMN20424755	SRR15254949	SAMN20424755	Blood030026	PP	37132985	35802371	0.9642
PRJNA749896	SAMN20424756	SRR15254948	SAMN20424756	Blood030028	PP	36515219	35238224	0.965
PRJNA749896	SAMN20424757	SRR15254946	SAMN20424757	Blood030030	MP>3	37914280	21448424	0.5657
PRJNA749896	SAMN20424758	SRR15254945	SAMN20424758	Blood030033	PP	40780515	39175719	0.9606
PRJNA749896	SAMN20424759	SRR15254944	SAMN20424759	Blood030035	PP	40368965	38785287	0.9608
PRJNA749896	SAMN20424760	SRR15254943	SAMN20424760	Blood030042	MP2-3	31841676	30689056	0.9638
PRJNA749896	SAMN20424761	SRR15254942	SAMN20424761	Blood030043	MP2-3	40045572	38388899	0.9586
PRJNA749896	SAMN20424762	SRR15254941	SAMN20424762	Blood030046	PP	37784407	36374924	0.9627
PRJNA749896	SAMN20424763	SRR15254940	SAMN20424763	Blood030047	PP	40017953	38410179	0.9598
PRJNA749896	SAMN20424764	SRR15254939	SAMN20424764	Blood030048	MP>3	40275431	38683057	0.9605
PRJNA749896	SAMN20424765	SRR15254938	SAMN20424765	Blood030049	MP2-3	30666788	29724834	0.9693
PRJNA749896	SAMN20424766	SRR15254937	SAMN20424766	Blood030051	PP	29461503	28610252	0.9711
PRJNA749896	SAMN20424767	SRR15254935	SAMN20424767	Blood030052	PP	41734201	39920201	0.9565
PRJNA749896	SAMN20424768	SRR15254934	SAMN20424768	Blood030054	PP	34929086	33857917	0.9693
PRJNA749896	SAMN20424769	SRR15254933	SAMN20424769	Blood030055	MP>3	41386690	39803701	0.9618
PRJNA749896	SAMN20424770	SRR15254932	SAMN20424770	Blood030057	PP	40777830	39221785	0.9618
PRJNA749896	SAMN20424771	SRR15254931	SAMN20424771	Blood040002	MP2-3	33497937	32509047	0.9705
PRJNA749896	SAMN20424772	SRR15254930	SAMN20424772	Blood040003	MP2-3	33500801	32544185	0.9714
PRJNA749896	SAMN20424773	SRR15254929	SAMN20424773	Blood040004	MP2-3	33950247	33062093	0.9738
PRJNA749896	SAMN20424774	SRR15254928	SAMN20424774	Blood040007	PP	34816540	33797344	0.9707
PRJNA749896	SAMN20424775	SRR15254927	SAMN20424775	Blood040009	MP2-3	33625422	32577059	0.9688
PRJNA749896	SAMN20424776	SRR15254926	SAMN20424776	Blood040010	MP2-3	33767785	32856176	0.973
PRJNA749896	SAMN20424777	SRR15254924	SAMN20424777	Blood040012	MP2-3	33898402	32923362	0.9712
PRJNA749896	SAMN20424778	SRR15254923	SAMN20424778	Blood040014	MP2-3	34026529	33018788	0.9704
PRJNA749896	SAMN20424779	SRR15254922	SAMN20424779	Blood040016	MP2-3	33690868	32776921	0.9729
PRJNA749896	SAMN20424780	SRR15254921	SAMN20424780	Blood040017	MP2-3	34222108	33280677	0.9725
PRJNA749896	SAMN20424781	SRR15254920	SAMN20424781	Blood040018	MP2-3	35200078	34247025	0.9729
PRJNA749896	SAMN20424782	SRR15254919	SAMN20424782	Blood040020	MP2-3	34810150	33798330	0.9709
PRJNA749896	SAMN20424783	SRR15254918	SAMN20424783	Blood040021	MP2-3	34455681	33445758	0.9707
PRJNA749896	SAMN20424784	SRR15254917	SAMN20424784	Blood040022	MP2-3	34720564	33819124	0.974
PRJNA749896	SAMN20424785	SRR15254916	SAMN20424785	Blood040023	MP2-3	33829301	32935018	0.9736
PRJNA749896	SAMN20424786	SRR15254915	SAMN20424786	Blood040024	MP2-3	33789369	32818264	0.9713
PRJNA749896	SAMN20424787	SRR15254913	SAMN20424787	Blood040025	MP2-3	36040035	35105085	0.9741
PRJNA749896	SAMN20424788	SRR15254912	SAMN20424788	Blood040027	MP2-3	34997791	34060149	0.9732
PRJNA749896	SAMN20424789	SRR15254911	SAMN20424789	Blood040028	MP2-3	34943526	33970324	0.9721
PRJNA749896	SAMN20424790	SRR15254910	SAMN20424790	Blood040029	MP2-3	34461691	33512645	0.9725
PRJNA749896	SAMN20424791	SRR15254909	SAMN20424791	Blood050001	MP2-3	32281361	31363365	0.9716
PRJNA749896	SAMN20424792	SRR15254908	SAMN20424792	Blood050003	MP2-3	31720564	30864751	0.973
PRJNA749896	SAMN20424793	SRR15254907	SAMN20424793	Blood050005	MP2-3	31957784	31088817	0.9728
PRJNA749896	SAMN20424794	SRR15254906	SAMN20424794	Blood050007	MP2-3	31230438	30417328	0.974
PRJNA749896	SAMN20424795	SRR15254905	SAMN20424795	Blood050009	MP2-3	32121572	31312278	0.9748
PRJNA749896	SAMN20424796	SRR15254904	SAMN20424796	Blood050011	MP2-3	32224393	31400705	0.9744
PRJNA749896	SAMN20424797	SRR15254902	SAMN20424797	Blood050013	MP2-3	32134637	31181101	0.9703
PRJNA749896	SAMN20424798	SRR15254901	SAMN20424798	Blood050015	MP2-3	33570961	32657340	0.9728
PRJNA749896	SAMN20424799	SRR15254900	SAMN20424799	Blood050017	MP2-3	31727442	30886947	0.9735
PRJNA749896	SAMN20424800	SRR15254899	SAMN20424800	Blood050019	MP2-3	30772888	29899158	0.9716
PRJNA749896	SAMN20424801	SRR15254898	SAMN20424801	Blood050021	PP	35030733	34027787	0.9714
PRJNA749896	SAMN20424802	SRR15254897	SAMN20424802	Blood050023	PP	33568887	32621230	0.9718
PRJNA749896	SAMN20424803	SRR15254896	SAMN20424803	Blood050025	PP	32820575	31968414	0.974
PRJNA749896	SAMN20424804	SRR15254895	SAMN20424804	Blood050027	PP	33131139	32180954	0.9713
PRJNA749896	SAMN20424805	SRR15254894	SAMN20424805	Blood050029	PP	30848038	30044051	0.9739
PRJNA749896	SAMN20424806	SRR15254893	SAMN20424806	Blood050031	PP	30860945	30023205	0.9729
PRJNA749896	SAMN20424807	SRR15254891	SAMN20424807	Blood050033	PP	31231622	30358831	0.9721
PRJNA749896	SAMN20424808	SRR15254890	SAMN20424808	Blood050035	MP2-3	30075040	29211479	0.9713
PRJNA749896	SAMN20424809	SRR15254889	SAMN20424809	Blood050037	PP	30208720	29330565	0.9709
PRJNA749896	SAMN20424810	SRR15254888	SAMN20424810	Blood050041	PP	31379496	30415703	0.9693
PRJNA749896	SAMN20424811	SRR15254887	SAMN20424811	Blood050043	PP	30852153	29995089	0.9722
PRJNA749896	SAMN20424812	SRR15254886	SAMN20424812	Blood050045	PP	32228051	31337629	0.9724
PRJNA749896	SAMN20424813	SRR15254885	SAMN20424813	Blood050047	PP	31948376	31079503	0.9728
PRJNA749896	SAMN20424814	SRR15254884	SAMN20424814	Blood050049	MP>3	31889363	30969515	0.9712
PRJNA749896	SAMN20424815	SRR15254883	SAMN20424815	Blood050051	MP>3	30698614	29807959	0.971
PRJNA749896	SAMN20424816	SRR15254882	SAMN20424816	Blood050053	MP>3	29761035	28120813	0.9449
PRJNA749896	SAMN20424817	SRR15254880	SAMN20424817	Blood050055	MP>3	31111323	30161850	0.9695
PRJNA749896	SAMN20424818	SRR15254879	SAMN20424818	Blood050057	MP>3	33162570	32002162	0.965
PRJNA749896	SAMN20424819	SRR15254878	SAMN20424819	Blood050059	MP>3	29857585	28981813	0.9707
PRJNA749896	SAMN20424820	SRR15254877	SAMN20424820	Blood050061	MP>3	31326035	30406043	0.9706
PRJNA749896	SAMN20424821	SRR15254876	SAMN20424821	Blood060001	MP2-3	35190181	34152428	0.9705
PRJNA749896	SAMN20424822	SRR15254875	SAMN20424822	Blood060003	PP	35060495	33875572	0.9662
PRJNA749896	SAMN20424823	SRR15254874	SAMN20424823	Blood060005	MP2-3	35244823	33828897	0.9598
PRJNA749896	SAMN20424824	SRR15254873	SAMN20424824	Blood060007	MP2-3	34791102	33764650	0.9705
PRJNA749896	SAMN20424825	SRR15254872	SAMN20424825	Blood060009	MP>3	32623805	31614959	0.9691
PRJNA749896	SAMN20424826	SRR15254871	SAMN20424826	Blood060011	MP2-3	32330794	31410195	0.9715
PRJNA749896	SAMN20424827	SRR15254869	SAMN20424827	Blood060013	MP>3	33027460	32090638	0.9716
PRJNA749896	SAMN20424828	SRR15254868	SAMN20424828	Blood060015	PP	32860182	31758128	0.9665
PRJNA749896	SAMN20424829	SRR15254867	SAMN20424829	Blood060017	PP	32484798	31502394	0.9698
PRJNA749896	SAMN20424830	SRR15254866	SAMN20424830	Blood060019	MP>3	33153817	32264302	0.9732
PRJNA749896	SAMN20424831	SRR15254865	SAMN20424831	Blood060021	PP	33373577	32403488	0.9709
PRJNA749896	SAMN20424832	SRR15254864	SAMN20424832	Blood060023	PP	33135802	32243283	0.9731
PRJNA749896	SAMN20424833	SRR15254863	SAMN20424833	Blood060025	PP	32782507	31865159	0.972
PRJNA749896	SAMN20424834	SRR15254862	SAMN20424834	Blood060027	PP	32437310	31536551	0.9722
PRJNA749896	SAMN20424835	SRR15254861	SAMN20424835	Blood060029	MP2-3	32664605	31433989	0.9623
PRJNA749896	SAMN20424836	SRR15254860	SAMN20424836	Blood060031	MP>3	32441447	31471110	0.9701
PRJNA749896	SAMN20424837	SRR15254857	SAMN20424837	Blood060033	MP>3	33137130	32167080	0.9707
PRJNA749896	SAMN20424838	SRR15254856	SAMN20424838	Blood060035	MP2-3	33184996	32100590	0.9673
PRJNA749896	SAMN20424839	SRR15254855	SAMN20424839	Blood060037	MP2-3	32856958	31828873	0.9687
PRJNA749896	SAMN20424840	SRR15254854	SAMN20424840	Blood060039	MP2-3	32598570	31718038	0.973
PRJNA749896	SAMN20424841	SRR15254853	SAMN20424841	Blood060041	MP2-3	32745805	31777743	0.9704
PRJNA749896	SAMN20424842	SRR15254852	SAMN20424842	Blood060043	MP2-3	32739601	31904919	0.9745
PRJNA749896	SAMN20424843	SRR15254851	SAMN20424843	Blood060045	MP2-3	32688436	31693243	0.9696
PRJNA749896	SAMN20424844	SRR15254850	SAMN20424844	Blood060047	MP>3	32441059	31442432	0.9692
PRJNA749896	SAMN20424845	SRR15254849	SAMN20424845	Blood060049	MP2-3	32485609	31505789	0.9698
PRJNA749896	SAMN20424846	SRR15254848	SAMN20424846	Blood060051	MP2-3	32218836	31138337	0.9665
PRJNA749896	SAMN20424847	SRR15254846	SAMN20424847	Blood060053	MP2-3	32902250	31973636	0.9718
PRJNA749896	SAMN20424848	SRR15254845	SAMN20424848	Blood060055	PP	31894052	31075512	0.9743
PRJNA749896	SAMN20424849	SRR15254844	SAMN20424849	Blood060057	MP>3	32794487	31989598	0.9755
PRJNA749896	SAMN20424850	SRR15254843	SAMN20424850	Blood060059	MP2-3	30838090	30000824	0.9728
PRJNA749896	SAMN20424851	SRR15254842	SAMN20424851	Blood060061	MP>3	32084043	31223328	0.9732
PRJNA749896	SAMN20424852	SRR15254841	SAMN20424852	Blood060063	MP>3	31673250	30706619	0.9695
PRJNA749896	SAMN20424853	SRR15254840	SAMN20424853	Blood060065	MP2-3	32840992	31954256	0.973
PRJNA749896	SAMN20424854	SRR15254839	SAMN20424854	Blood060067	MP2-3	32746187	31890412	0.9739
PRJNA749896	SAMN20424855	SRR15254838	SAMN20424855	Blood060069	MP>3	32395251	31521232	0.973
PRJNA749896	SAMN20424856	SRR15254837	SAMN20424856	Blood060071	MP2-3	33393666	32413564	0.9707
PRJNA749896	SAMN20424857	SRR15254835	SAMN20424857	Blood060073	MP2-3	30168424	29302402	0.9713
PRJNA749896	SAMN20424858	SRR15254834	SAMN20424858	Blood060075	MP>3	31014421	30145932	0.972
PRJNA749896	SAMN20424859	SRR15254833	SAMN20424859	Blood060077	MP2-3	31461913	30581577	0.972
PRJNA749896	SAMN20424860	SRR15254832	SAMN20424860	Blood060079	MP2-3	30707561	29820784	0.9711
PRJNA749896	SAMN20424861	SRR15254831	SAMN20424861	Blood060081	MP2-3	32245636	31386252	0.9733
PRJNA749896	SAMN20424862	SRR15254830	SAMN20424862	Blood060083	MP2-3	31959946	31098867	0.9731
PRJNA749896	SAMN20424863	SRR15254829	SAMN20424863	Blood060085	MP>3	31753389	30776570	0.9692
PRJNA749896	SAMN20424864	SRR15254828	SAMN20424864	Blood060087	MP2-3	30575608	29852681	0.9764
PRJNA749896	SAMN20424865	SRR15254827	SAMN20424865	Blood060089	MP2-3	32752182	31879254	0.9733

## Sheet: Supplementary Table 3
Supplementary Table 3. Gene ontology enrichment analysis of genes in significantly correlated modules (module traity correlation >=0.25)
GOID	DESCRIPTION	PVALUE	FDR	NUM_LIST_ANNOTATIONS	LIST_SIZE	TOTAL_NUM_ANNOTATIONS	ANNOTATED_GENES	GENE_RATIO	Enrichment_score	ontDomain	Module
GO:0044699	single-organism process	0.00379147	0	441	753	6138	KDELR1,SH3TC2,SH3BP5,ENSBTAG00000038532,CASP9,ACOT7,MICAL2,ENSBTAG00000007070,ROM1,PCYT2,PRKAB1,NDRG2,MAP2K3,COG7,STK10,SLC27A1,TAOK2,AKT1,CHST12,FLII,TRIM27,EPS8L2,DLST,P4HA2,PVRL1,PACS2,PAOX,PNPLA2,STAT6,TMEM55B,CREG2,LIMS2,TSHZ2,LINGO1,SARM1,AP3D1,WFS1,TAGLN2,PPDPF,TUB,NR2F6,FAM83H,NAPSA,MTOR,ABCG4,THNSL2,DSEL,NAGPA,ENSBTAG00000004248,ENSBTAG00000000745,GJA1,PACSIN2,PTPA,LRRK1,SPNS1,TRPV2,TECR…	0.585657	2.42119	BP	Black
GO:0032787	monocarboxylic acid metabolic process	0.0191778	0.02	30	753	203	SLC27A4,CD74,ACOT7,D2HGDH,ADIPOR1,PFKM,ABCD1,TECR,ACAA1,TPI1,SESN2,ZADH2,PRKAB1,SLC27A3,CRYL1,ENSBTAG00000013411,HAGH,DSEL,ECHS1,SLC27A1,ENSBTAG00000004248,ACACB,GALK1,CYP2S1,THNSL2,HAGHL,PKLR,LPIN3,CHST12,ACAT2	0.0398406	1.7172	BP	Black
GO:0044282	small molecule catabolic process	0.0290486	0.04	22	753	128	LPIN3,AMDHD2,ACAT2,IMPA2,ECHS1,GALK1,MT3,BCKDK,HAGH,HAGHL,THNSL2,LRP5,SESN2,UROC1,GCAT,SLC27A4,TPI1,ACAA1,SHMT1,ABCD1,ALDH4A1,PFKM	0.0292165	1.53687	BP	Black
GO:0048523	negative regulation of cellular process	0.0383193	0.04	186	753	2282	TUBB4A,ADIPOR1,PADI2,LATS2,SMARCA2,WAS,BACE2,BHLHE40,PDCD6,PHF2,NFIX,PLXNB1,ARAF,BOK,FADD,CISH,CDKN1C,ZBTB38,CD74,SERTAD1,BAHCC1,WNK2,UNC5B,TYRO3,ZNF703,GRINA,ZNF219,SIRT2,RELA,WASHC1,NISCH,ZMYND15,ENSBTAG00000000598,ZBTB16,SRC,ESRRA,TRIM8,PSRC1,CCDC22,RHBDD3,COL7A1,ENSBTAG00000005815,MYO1D,BMPR1B,CD34,NPC1,SMCR8,ADGRA2,GRK2,ACACB,TNRC18,ELFN2,LEMD2,CORO1A,PPIF,CTDSP1,IRF8,DUS2,KATNB1,PACSIN3,TME…	0.247012	1.41658	BP	Black
GO:0016020	membrane	2.68e-10	0	388	753	4775	ARHGDIA,TLCD2,SMIM4,STK11,POMGNT2,FLNA,DPM3,RAB1B,PMEL,UBA1,SNX19,PAM16,HGS,ARMC7,LFNG,TMED1,SRPRA,NEU1,S1PR2,ATG9A,EBI3,ADCY8,FCRL6,IL17RA,LPAR5,TMEM101,TMEM104,PLD4,STX5,ENSBTAG00000012647,TNK2,SAYSD1,NKD2,PTGER1,SLC22A18,EHD2,HMOX2,SLC35C2,NDUFS8,XXYLT1,C17orf62,APLP1,IL4R,GNB2,TNFRSF12A,SLC4A1,SHANK2,ENSBTAG00000008584,COL17A1,JAG1,RGS14,TMEM169,VPS18,FAM155B,ENSBTAG00000004664,TP53I13,STK11I…	0.515272	9.57251	CC	Black
GO:0031982	vesicle	2.07e-05	0	190	753	2159	ENSBTAG00000011918,CD93,ITGB2,CCDC22,SRC,RAB11FIP4,HLA-DMA,TOM1,ACTR1B,PSMD7,LCN2,TPI1,CD74,PLEC,AP1S1,KIFC3,WASHC1,TMEM187,SEC31B,UBXN6,CLEC3B,SCAMP2,GCHFR,ATP8B3,BOK,GAA,APRT,GALNT2,NCS1,SYNGR2,COL6A1,TUBB4A,PADI2,SLC23A1,FGD2,PDCD6,SOGA1,WAS,CRYL1,GNPTG,TH,G6PD,RENBP,GALK1,AP2A2,UNC93B1,ENSBTAG00000005042,CHST14,NAPG,PKLR,MAN1B1,AP2S1,SERPINB9,ADAM15,RABAC1,SV2C,ENSBTAG00000006982,VAT1,DNAJC14…	0.252324	4.68346	CC	Black
GO:0005737	cytoplasm	2.33e-05	0	438	753	5955	RPS6KA4,TNRC18,CORO1A,PPIF,HUNK,COL26A1,PHLPP1,CYB561,ATF5,ALDH3A2,KATNB1,IRF8,PCK2,NUBP1,TAP1,PARP10,CERK,TRADD,ENSBTAG00000007106,ENSBTAG00000005815,NPC1,ACTB,NPAS3,CTSD,URGCP,NAXD,NRROS,MRPL38,PPP1R14A,STK36,DGAT1,G6PD,GALK1,AP2A2,CHST14,VAPB,PKLR,NAPG,G6PC3,MAPK7,ENSBTAG00000006982,BAX,TNIP2,DNAJC14,ENSBTAG00000013411,EXOC3L4,QPCTL,NEIL2,ACHE,DOK1,BAIAP2L1,ACADS,SREBF1,TMEM8A,PINK1,ANK3,CLEC3…	0.581673	4.63236	CC	Black
GO:0005576	extracellular region	0.000623152	0	173	753	2019	PFKM,HSPG2,SHMT1,NTN1,NXPE4,PCSK6,ABHD8,PODXL,TAGLN2,ARPC1B,LINGO1,TUB,APMAP,NAPSA,DUSP23,ENSBTAG00000000745,PTPA,GJA1,PACSIN2,CLIC3,PLXNB2,ACTN4,ENSBTAG00000038532,GSS,ACOT7,C11orf94,CUTA,ANGPTL6,STK10,RRAS,NDRG2,HPCAL1,Csnk2b-Ly6g5b,ECHS1,NUDT14,SIAE,ARSA,MYL6,SAT2,EPS8L2,DLST,CAT,DNAJC5,LFNG,SRPRA,NEU1,PLOD3,ABHD14B,ENSBTAG00000020923,RAB1B,UBA1,QSOX2,HAGH,CIB2,RNPEP,HGS,DYNC1H1,CPE,TLN1,H2AFJ…	0.229748	3.20541	CC	Black
GO:0005623	cell	0.0011332	0	601	753	8893	ENSBTAG00000004664,TRIM3,FAM155B,LPIN3,GRB14,MAPK10,PFKM,SESN2,ZADH2,INTS3,PODXL,SNAP29,TRIM25,ECHS1,CLN6,CTNND2,ATP2B4,KEAP1,HPS1,MYL6,PHACTR3,ARSA,RHOD,PTRF,ALPK2,PLXNB2,ACTN4,RNF220,ENSBTAG00000025441,MFSD10,PORCN,CBX8,TPCN1,LZTS2,HGS,ZHX3,SNX19,FBXW5,ZBTB7B,UBA1,PMEL,RAB1B,DPM3,POMGNT2,TP53BP2,SMIM4,IMPA2,STX5,PLD4,RBCK1,LPAR5,IL17RA,ITPKC,ADCY8,ATG9A,TBL2,S1PR2,PLOD3,RRP12,NEU1,LFNG,ROGDI,NC…	0.798141	2.9457	CC	Black
GO:0005515	protein binding	0.0432028	0.08	270	753	3618	PYY,ZNF703,HLA-DMA,MLKL,CDKN1C,CD74,TREM2,ITGB2,MVD,CCDC22,PSRC1,PGAM5,CD151,RAB11FIP4,ESRRA,CRAT,BoLA,ZBTB16,EEF2K,USF2,ELMO3,PICK1,CRYL1,GNPTG,WAS,COL6A1,SMARCA2,ENSBTAG00000001498,TRIOBP,ARAF,BOK,HES2,PLXNB1,FRS3,TREX1,PHF2,CD81,SNAP25,VASN,RIN1,PARP16,LRP5,SERPINB9,ADAM15,RABAC1,IRAK1,ABI3,IPO13,UNC93B1,NPLOC4,PTPN3,LDB1,DCLRE1B,TH,CD34,MAP1B,NARF,APEH,JUP,ABCD1,IKBKE,EPM2A,RNF185,PPP1R26,EML…	0.358566	1.36449	MF	Black
GO:0065007	biological regulation	0.0357153	0.02	94	143	5980	IL27RA,TAF3,PDK2,PRKCE,GAS8,UBASH3A,ZSCAN2,CD4,CA12,ARHGAP39,GATA3,ENSBTAG00000015258,PRKCZ,PDE2A,SLC25A23,PHF19,CC2D1B,RTN4RL1,SSBP4,POLR3D,APBB1,FBXO31,TRAF3IP2,SATB1,PTPRS,DCHS1,ACTN1,PATZ1,RBFOX3,CCND2,LTBP3,TCF7,SERPINH1,TNKS1BP1,TLE1,AGAP2,FBXO10,SMG6,CAMSAP1,TNRC6C,TSPAN15,SLC22A5,ZNRF3,JAK3,SPECC1L,S1PR4,ENSBTAG00000013249,CDC25B,SNAI3,ADGRL1,CHD3,ENSBTAG00000000829,GDPGP1,CBLC,BCR,LAT,JA…	0.657343	1.44715	BP	Darkred
GO:0071944	cell periphery	0.0264677	0.04	40	143	1924	AXIN2,SYN2,ABCB6,ACTN1,FXYD7,ITGA5,MICAL3,DCHS1,PTPRS,APBB1,PLCG1,PLSCR3,AMIGO1,KIRREL3,KCNH2,EFNA1,NTNG2,SLC22A17,LDLRAP1,CDH24,CA9,CDH23,CD4,JAK3,PRKCE,ZNRF3,SLC22A5,TSPAN15,CCR7,CHRNB3,SMAD7,RTN4RL1,BCR,SLC41A3,LAT,PRKCZ,PDE2A,ENSBTAG00000015258,CALHM2,CBLC	0.27972	1.57728	MF	Darkred
GO:0005488	binding	0.0366644	0.12	102	143	6909	SPTAN1,CBLC,LAT,ZNRF1,JAZF1,SMAD7,CHRNB3,CCR7,ENSBTAG00000048041,RCN3,PHC1,SLC22A5,TSPAN15,ZNRF3,JAK3,MAP1A,CPZ,ENSBTAG00000013249,CDC25B,SNAI3,CHD3,ADGRL1,GDPGP1,CA9,ZNHIT3,GRTP1,SGSM2,CDC42BPG,ZNF16,LDLRAP1,NQO2,KALRN,CASZ1,EFNA1,KCNH2,COL5A1,PLCG1,PLSCR3,ZFP28,ERI3,MAF,RRP1B,ITGA5,KIF7,ZNF512B,ACAD9,NPAS2,ABCB6,ZBTB14,SYN2,HIVEP2,MLLT6,SHF,AXIN2,ENSBTAG00000004894,ENSBTAG00000015258,PRKCZ,PDE2…	0.713287	1.43576	MF	Darkred
GO:0023052	signaling	2.28e-05	0	62	180	2121	S1PR1,ARAP2,PDE1B,TXK,ADCYAP1R1,F2R,ARL10,DAPL1,YES1,CD3E,CD3D,GPR171,PTGDR,LAX1,GPR15,SCG5,KLHL6,ITGAE,RHPN2,PDK1,TRIB3,ENSBTAG00000035662,CD27,FOXO1,JAK1,CD3G,PRKCH,AKT3,JMY,ENSBTAG00000046699,PODNL1,SLC20A1,PRKCQ,STK38,BCL11B,RCAN3,TNIK,CCR4,CD247,ITK,NCALD,SKAP1,RAP2A,MAP3K13,STMN1,INPP4B,ZAP70,ITGA6,LEF1,LCK,FYN,RASGRP1,IL7R,TOB1,SH2D1A,RAPGEF2,DYRK2,NCOA3,KCNMB4,RTKN2,THEMIS,RORA	0.344444	4.64237	BP	Midnightblue
GO:0007154	cell communication	5.29e-05	0	62	180	2168	F2R,ADCYAP1R1,ARAP2,PDE1B,S1PR1,TXK,GPR171,PTGDR,GPR15,LAX1,ARL10,DAPL1,YES1,CD3E,CD3D,ENSBTAG00000035662,FOXO1,CD27,KLHL6,SCG5,ITGAE,RHPN2,PDK1,TRIB3,JMY,ENSBTAG00000046699,SLC20A1,PODNL1,PRKCQ,STK38,BCL11B,JAK1,CD3G,PRKCH,AKT3,CCR4,CD247,RCAN3,TNIK,STMN1,LEF1,INPP4B,ITGA6,ZAP70,LCK,ITK,NCALD,SKAP1,RAP2A,MAP3K13,TOB1,SH2D1A,FYN,RASGRP1,IL7R,RTKN2,THEMIS,RORA,RAPGEF2,DYRK2,NCOA3,KCNMB4	0.344444	4.27688	BP	Midnightblue
GO:0018212	peptidyl-tyrosine modification	7.87e-05	0	11	180	89	DYRK2,ITK,YES1,JAK1,LCK,ZAP70,TXK,BAZ1B,FYN,TPST1,F2R	0.0611111	4.10377	BP	Midnightblue
GO:0065007	biological regulation	0.000232668	0	122	180	5980	RHPN2,ITGAE,ZNF354C,KLHL6,ETS1,EOMES,DENND2D,ENSBTAG00000035662,CD27,FOXO1,RINL,MLLT3,USP7,PRKCQ,JMY,CDCA7,STK38,ZSCAN26,KLF8,SYTL2,ARAP2,RAB17,F2R,NFX1,ARL10,CD3E,ZFP37,GPR171,GPR15,ZNF667,FYN,STN1,IL7R,RASGRP1,TOB1,SLAMF1,SH2D1A,ENSBTAG00000003575,RBL2,BEND6,NCOA3,KCNMB4,BEND5,LEPROTL1,GFI1,ZNF331,RBL1,THEMIS,ZNF239,ZNF891,RCAN3,TNIK,CCR4,PIM2,CD247,NCALD,MAP3K13,ZNF879,STMN1,ZNF10,WWP1,SCG5,TI…	0.677778	3.63326	BP	Midnightblue
GO:0050896	response to stimulus	0.00176066	0	79	180	3364	RAPGEF2,DYRK2,RTKN2,RORA,ITK,SKAP1,RAP2A,ID3,INPP4B,LCK,ITGA6,LEF1,ZAP70,CD96,ARNTL,JAK1,CD3G,PRKCH,AKT3,ENSBTAG00000046699,PODNL1,SLC20A1,BCL11B,SCG5,PDK1,TRIB3,TIMP3,SERPINE2,YES1,DAPL1,CD3D,PTGDR,LAX1,S1PR1,PDE1B,DDHD2,BAZ1B,TXK,CRTAM,POLD3,ADCYAP1R1,KCNMB4,NCOA3,GFI1,THEMIS,FYN,RASGRP1,IL7R,SLAMF1,TOB1,SH2D1A,NCALD,MAP3K13,STMN1,RCAN3,TNIK,CCR4,PIM2,CD247,USP7,JMY,PRKCQ,STK38,KLHL6,RHPN2,ITGA…	0.438889	2.75432	BP	Midnightblue
GO:0046777	protein autophosphorylation	0.00295531	0.02	11	180	127	PIM2,ENSBTAG00000035662,TNIK,TXK,FYN,LCK,ZAP70,MAP3K13,JAK1,YES1,ITK	0.0611111	2.5294	BP	Midnightblue
GO:0002376	immune system process	0.00450364	0.02	31	180	875	ZAP70,ITGA6,GPR15,LEF1,LCK,LAX1,YES1,ITK,CD3D,CD3E,SKAP1,CCR4,CD247,S1PR1,RAB17,FST,TXK,RTKN2,GFI1,BCL11B,RORA,THEMIS,JAK1,SLAMF1,SH2D1A,CD27,FYN,KLHL6,EOMES,IL7R,RASGRP1	0.172222	2.34644	BP	Midnightblue
GO:0001775	cell activation	0.00692297	0.04	16	180	291	IL7R,EOMES,RASGRP1,FYN,SLAMF1,RORA,BCL11B,THEMIS,F2R,CD3D,CD3E,ITK,LEF1,LAX1,LCK,ZAP70	0.0888889	2.15971	BP	Midnightblue
GO:0022407	regulation of cell-cell adhesion	0.0195343	0.06	13	180	215	PRKCQ,ZAP70,ITGA6,LEF1,LAX1,LCK,SERPINE2,CD3E,SLAMF1,CD27,ETS1,IL7R,RASGRP1	0.0722222	1.7092	BP	Midnightblue
GO:1902715	positive regulation of interferon-gamma secretion	0.0344037	0.14	3	180	5	SLAMF1,CD2,RASGRP1	0.0166667	1.46339	BP	Midnightblue
GO:0002521	leukocyte differentiation	0.0385316	0.16	12	180	197	SLAMF1,EOMES,IL7R,LEF1,RORA,ZAP70,BCL11B,LCK,THEMIS,CD3D,CD3E,ITK	0.0666667	1.41418	BP	Midnightblue
GO:0098552	side of membrane	4.22e-07	0	19	180	241	FYN,ITGAE,IL7R,SLAMF1,CD27,JAK1,ICOS,S1PR1,TXK,CCR4,YES1,ITK,SERPINE2,CD3E,CD2,CD69,ITGA6,ZAP70,LCK	0.105556	6.37481	CC	Midnightblue
GO:0071944	cell periphery	0.00880599	0	49	180	1924	ADCYAP1R1,F2R,RAB22A,CRTAM,CNNM2,TXK,SYTL2,S1PR1,RAB17,LAX1,PTGDR,PARD6B,CD69,GPR171,CD3D,CD2,CD3E,YES1,TCAF1,SERPINE2,NFX1,CD27,ITGAE,PRKCQ,SLC20A1,AKT3,PRKCH,CD3G,JAK1,CD247,CCR4,TNIK,LCK,ITGA6,ZAP70,KCNA3,ATP4B,RAP2A,SKAP1,ITK,RAB19,SLAMF1,IL7R,RAB39B,RASGRP1,FYN,ICOS,KCNMB4,RAPGEF2	0.272222	2.05522	CC	Midnightblue
GO:0001071	nucleic acid binding transcription factor activity	7.21e-05	0	26	180	580	KLF12,FOXO1,ENSBTAG00000003575,ZNF354C,ETS1,KLHL6,TAF4B,EOMES,GFI1,ENSBTAG00000046699,KLF8,ZSCAN26,ZNF239,RORA,BCL11B,ZFP1,ENSBTAG00000010252,ZNF140,ENSBTAG00000000943,ARNTL,TXK,ID3,ZFP37,ZNF879,LEF1,NFX1	0.144444	4.14188	MF	Midnightblue
GO:0016773	phosphotransferase activity, alcohol group as acceptor	0.0196537	0.08	20	180	528	ZAP70,LCK,NEK9,MAP3K13,YES1,ITK,PIM2,TXK,TNIK,BAZ1B,STK38,PRKCQ,DYRK2,AKT3,PRKCH,JAK1,ENSBTAG00000035662,TRIB3,PDK1,FYN	0.111111	1.70655	MF	Midnightblue
GO:0016301	kinase activity	0.0291439	0.1	21	180	587	BAZ1B,TNIK,TXK,PIM2,ITK,YES1,MAP3K13,NEK9,LCK,ZAP70,FYN,PDK1,TRIB3,ENSBTAG00000035662,JAK1,PRKCH,AKT3,DYRK2,PRKCQ,STK38,PTK2	0.116667	1.53545	MF	Midnightblue
GO:0006396	RNA processing	0.011123	0	50	639	494	NSUN3,DHX57,TARBP1,SRSF6,RBM15,PAN2,NSUN4,DQX1,TFB1M,PUS10,DIS3,LUC7L,DDX5,PRPF39,SRSF8,ADAT2,SFPQ,RBM5,CDK13,TRMT10A,RBM41,CPSF6,ZNF473,USP49,SUGP2,LUC7L3,PRPF3,GCFC2,ZBTB8OS,SRRM1,METTL3,CDKAL1,SAMD15,PSPC1,SRSF7,RBM23,AKAP8L,DDX46,ENSBTAG00000031829,ago-03,ZFC3H1,NSUN6,THG1L,LSM11,NOL9,RBMX2,SF3B1,RBM39,PRPF4B,SRSF11	0.0782473	1.95378	BP	Orange
GO:0010468	regulation of gene expression	0.014908	0	159	639	2213	CEP290,NLK,GMEB1,ZMYND8,ENSBTAG00000012184,RSF1,EPM2AIP1,TCERG1,KDM6A,MDM4,ZFP2,IFT74,RBMX,GCFC2,ZNF606,DDN,TBX19,PRDM16,MOK,ZNF34,RRN3,PHF21B,SRSF8,MLLT11,PGBD1,ZNF473,ATG14,ARID2,OGT,SETD6,PAXBP1,SFMBT2,ZNF432,BCL2,HAX1,TAF8,TIA1,NSUN3,EXD1,ZNF792,HSF5,RPAP2,ATP8B1,CNTN2,ENSBTAG00000007167,ZBTB4,ZNF624,UHRF2,ENSBTAG00000047954,ENSBTAG00000039946,WWOX,UPF2,HOXD3,SLTM,TSC1,TAF1D,BMP4,PSPC1,SRSF7,…	0.248826	1.82658	BP	Orange
GO:0044782	cilium organization	0.0284232	0.04	21	639	141	NME8,CEP290,WDPCP,TTLL5,DYX1C1,NPHP3,RFX3,TTBK2,IFT52,ALMS1,GORAB,PTPDC1,CEP89,RPGRIP1L,TMEM138,TTC8,CEP41,MNS1,BBS9,RTTN,IFT74	0.0328639	1.54633	BP	Orange
GO:0005929	cilium	0.000813369	0	30	639	225	RPGRIP1L,TMEM138,TTC8,CABYR,CEP41,RTTN,BBS9,MNS1,IFT74,IFT52,IFT88,ATG14,SPATA7,CEP89,CATSPERD,KIF5A,NPHP3,TMEM80,MOK,RGS9,TTBK2,GPR83,NME8,ODF2,WDPCP,CEP290,DAAM1,TTLL5,SLC9C1,CNGA1	0.0469484	3.08971	CC	Orange
GO:0005634	nucleus	0.00176779	0	268	639	4114	MCM8,IFT74,TRIM66,USP48,FAM76B,PLCB4,SHPRH,ARGLU1,TCERG1,KDM6A,EPM2AIP1,ANAPC10,RSF1,ENSBTAG00000012184,GMEB1,SYNE2,RNPC3,SPDYA,HSF5,TAF8,TIAL1,BCL2,SFMBT2,PAXBP1,OGT,SETD6,RAB11FIP2,UBP1,GNL3L,ZNF473,KANSL2,TTBK2,SNRNP48,PGBD1,MLLT11,PHF21B,SRSF8,ZNF34,TBX19,DDN,PNISR,GCFC2,RBM6,RBMX,AKAP8L,TIMMDC1,MAPK15,HSBP1,PSPC1,LETMD1,ENSBTAG00000007167,PAN2,PRKCB,ANAPC1,DDX5,DDX6,ENSBTAG00000013260,SCAF8,…	0.419405	2.75257	CC	Orange
GO:0044422	organelle part	0.00184098	0	304	639	4778	MYO1A,TUBE1,CNGA1,TUBGCP5,ENSBTAG00000007167,NME8,CNST,AKAP8L,TIMMDC1,ERP27,LETMD1,PSPC1,MAN2A2,TSC1,SCAF8,SCN3B,ASH2L,RPAIN,ENSBTAG00000009566,CARF,LETM2,C4orf47,NSUN4,PRKCB,CEP41,ANAPC1,ENSBTAG00000007616,DDX5,VPS8,RGS9,ALS2,SHPRH,ARGLU1,MFN1,KIF5A,TCERG1,KDM6A,EPM2AIP1,MAIP1,ANAPC10,CEP70,RSF1,SYNE2,GMEB1,RNPC3,IFT74,TTC8,TRIM66,FAM76B,USP48,ST3GAL6,ZNF473,GNL3L,UBP1,KANSL2,TTBK2,SNRNP48,MLLT1…	0.475743	2.73495	CC	Orange
GO:0005815	microtubule organizing center	0.0371699	0	42	639	437	CEP89,gen-01,IFT52,SDCCAG8,BBS9,RTTN,KIAA0753,IFT74,CEP295,SASS6,TAF1D,TEK,DYNC1LI2,TTLL5,CEP70,RBM39,TUBGCP5,CEP95,CEP290,ALS2,CCDC77,CEP128,CNTRL,ZNF12,ODF2L,IFT88,CEP57L1,SPATA7,CSPP1,CEP41,RPGRIP1L,AKAP9,DAAM1,SYTL4,C4orf47,CEP192,BIRC6,ODF2,TTBK2,KATNAL1,MLLT11,RIC8B	0.0657277	1.42981	CC	Orange
GO:0005623	cell	0.0439142	0	505	639	8893	HUS1,MCM9,KIN,EXOC2,RBM15,MNS1,APPL2,LUC7L,PHKG1,GAS2,AMDHD1,MYCBPAP,RALGAPA1,THOC1,ZNF12,TLK1,CLK2,RNF20,IMMP2L,TBRG1,RECQL,NBEA,PARG,CDK13,TRMT10A,CCDC174,NOBOX,TAF15,PRPF3,ZRANB2,CDKAL1,KLHL20,KCNRG,ZBTB25,KIAA0753,IWS1,USP28,UFSP2,ASB14,FTO,TRIM45,gen-01,HNRNPDL,GBF1,NUDT19,ZNF394,GLS,PALB2,SYCP2,BUB3,CWC27,ZBTB11,NPL,SPRTN,RCBTB1,CEP95,PRELID3A,ZDHHC17,SRSF11,TRIM23,YTHDC1,AKAP9,ENSBTAG00000…	0.790297	1.3574	CC	Orange
GO:0005488	binding	0.00240777	0	415	639	6909	GAS2,AMDHD1,RBM33,PHKG1,LUC7L,ZNF12,ENSBTAG00000046101,EXOC2,JRKL,KIN,MCM9,PON3,MNS1,RBM15,USP49,TAF15,PRPF3,NOBOX,ZRANB2,RECQL,CSNK1G1,PRDM10,TLK1,RNF20,CLK2,CDK13,TRMT10A,NBEA,ZFP62,FTO,ASB14,HNRNPDL,gen-01,TRIM45,THAP8,CDKAL1,ZFAND1,ZBTB25,KCNRG,TET1,KLHL20,ZBTB37,ZDHHC17,SPRTN,DPEP2,SRSF11,TRIM23,LCORL,SYCP2,PALB2,ZNF394,ZFC3H1,NUDT19,GBF1,NPL,ZBTB11,FNDC3A,TFB1M,PUS10,ZC3H7A,DZIP3,MAFA,AKAP9…	0.649452	2.61838	MF	Orange
GO:0044699	single-organism process	7.14e-28	0	959	1492	6138	SERAC1,JAGN1,STBD1,AVPI1,MTFR1L,ADAM9,APBA1,ENSBTAG00000008592,GPR31,IVD,FAH,HGF,KLF15,DSE,LDHA,CTNND1,PRELID1,RILP,FOS,ATP6V1E1,GGH,ENSBTAG00000047043,NECTIN2,NFAM1,PRKCA,NINJ2,SLC37A2,LTB4R,KIRREL,SCP2,ADGRA3,LPL,CLEC5A,SDC3,TSPO,BAG3,SEMA4F,POMT2,TIGAR,AK4,TNFSF8,CREB3L4,PDE4A,ANXA3,RAB3D,FZD2,NQO1,PNPO,ENSBTAG00000026657,RIN2,SLC25A20,ENSBTAG00000012317,NCSTN,SLC23A2,MYLK3,FURIN,EPB41L3,SLC9A…	0.642761	27.1461	BP	Tuquoise
GO:0051179	localization	2.36e-10	0	423	1492	2537	CHP1,TBC1D8,FNBP1L,SNX33,PKP2,ARL6IP5,NLRC4,SLC26A6,SYT5,CHRNB1,ATP6V0E1,APP,ZNF205,GM2A,SLC16A7,SORD,SLC39A8,RIMS2,ACSL1,CFI,BAMBI,CREB3,ENSBTAG00000014936,RYR1,ASIP,SNX7,PLA2G4A,DNM2,CD163,TTYH3,CTNNA1,TPCN2,EFNB1,IL12B,ABCC12,HM13,LONP2,XPR1,KIF5C,C2CD2L,LDLR,GPAM,NECTIN3,ZDHHC15,TNR,SH3PXD2B,AQP9,KCNK17,TNFAIP2,ATG3,MFSD1,NOL3,STXBP6,MEF2C,SLC8B1,YKT6,CLTA,TRPM6,FCN2,ACO1,LRP1,SLC5A6,RHOA,ENS…	0.283512	9.62739	BP	Tuquoise
GO:0050896	response to stimulus	1.47e-09	0	530	1492	3364	LTB4R,NINJ2,ADGRA3,CLEC5A,LPL,LXN,JAGN1,ADAM9,ENSBTAG00000008592,GPR31,ENSBTAG00000038128,HGF,KLF15,FOS,NFAM1,PRKCA,NQO1,ENSBTAG00000026657,RIN2,MYLK3,GPR141,RCAN1,PLCD1,BAG3,SEMA4F,TIGAR,POMT2,CREB3L4,TNFSF8,PDE4A,ANXA3,FZD2,PIK3CB,MAP3K11,ARL6IP5,TMX1,CHRNB1,RAPH1,CCR2,MRAS,CTSB,DOCK7,PRKCI,CLEC4D,MAPK8,HTR7,PDZD8,ACADVL,IL20RA,INSIG1,HM13,EFNB1,XPR1,KIF5C,ASIP,CLEC1B,ADRB3,CREB3,TPCN2,TPM1,PLA…	0.355228	8.83236	BP	Tuquoise
GO:0023052	signaling	3.88e-08	0	355	1492	2121	IRAK3,ARHGAP18,SNX15,ENSBTAG00000001483,GNAI1,FCGRT,GAB1,SCN9A,HMOX1,INSR,ENSBTAG00000013284,CACNB3,CALCRL,CSF2RA,TNFRSF1A,ADGRL3,ACVR1B,PAQR8,IL2RA,LAT2,ENSBTAG00000006354,DSTYK,ZNF516,FES,ENSBTAG00000007746,CD63,ENSBTAG00000018593,ERLIN2,SGPP1,CHI3L1,SOCS6,PTPN2,RELT,TLR5,TNFSF9,FZD1,GPR68,ENSBTAG00000027513,CCDC88A,NCKAP1L,TYROBP,ITGAL,MRC1,GNGT2,AXL,EDEM2,DOCK3,CTSH,GNB1,IFT57,RAMP2,TSPAN31,A…	0.237936	7.41156	BP	Tuquoise
GO:0006952	defense response	2.31e-07	0	96	1492	405	LTBR,ENSBTAG00000037558,FFAR2,LGALS8,ABL2,FCER1G,SPHK1,ENSBTAG00000020535,VNN1,CLEC4D,GSDMD,IRF5,NLRC4,SLC26A6,CCR2,P2RX7,CLEC4E,ENSBTAG00000046158,ENSBTAG00000026088,C1QA,TLR7,RAB1A,STAB1,CD14,AIF1,ENSBTAG00000048122,NUPR1,FCN2,CARD15,LIPA,ACVR1,CLEC6A,TNFRSF1B,CD163,IRAK2,IL12B,BPI,TICAM2,GPAM,SCN9A,PGLYRP1,HMOX1,C3,ENSBTAG00000009938,TYK2,DAPK1,CD86,IL10,PRKCD,ENSBTAG00000008592,FGR,TNFAIP8L2,…	0.0643432	6.63669	BP	Tuquoise
GO:0065007	biological regulation	5.73e-07	0	845	1492	5980	CHMP2A,GNB1,SELENON,OPTN,GPC1,DCBLD2,CCDC88A,TWIST1,MYBL1,NCKAP1L,TNFSF4,ENSBTAG00000000524,GNGT2,LDLRAD3,EDEM2,SCPEP1,DOCK3,SLC11A1,TLR5,GAS1,GPR68,TEP1,ENSBTAG00000018593,ERLIN2,RAB38,SOCS6,CHI3L1,DUSP16,IL2RA,ENSBTAG00000006354,RBSN,DSTYK,CNPPD1,ADAP2,SLC35F6,APBB2,CTSS,ZNF629,RAP1GAP,CALCRL,CACNB3,CSF2RA,RAB7B,ADGRL3,BRINP1,INSR,ENSBTAG00000013284,P4HB,TNFAIP8L2,IRAK3,SNX15,ZNF35,FBXW11,TXNDC…	0.566354	6.24185	BP	Tuquoise
GO:0022610	biological adhesion	1.22e-06	0	77	1492	307	TM9SF4,ACVR1,ITGAM,NINJ1,LGALS3BP,CTNNA1,ARVCF,SCARB1,FGFRL1,ENSBTAG00000017866,ENSBTAG00000004869,PCDH19,VCAN,NECTIN3,TNR,CTNNAL1,CNTN3,RAB1A,STAB1,STXBP6,ITGB1,TTYH1,PKP2,VNN1,SMAD6,COL5A3,ITGAV,IGFBP7,LYPD3,PCDH7,PECAM1,EDA,PCDH17,ESAM,PTPRK,EMILIN1,JAM3,FAT1,FAT3,ITGB5,ITGAL,PKP4,CADM1,ANXA1,ITGB6,AXL,MSN,TGFBI,LAMA5,CD63,FZD4,LYPD5,ARHGAP6,FES,S100A8,ADAM17,CDH10,KIRREL,NINJ2,S100A11,CX3CR1,…	0.0516086	5.91195	BP	Tuquoise
GO:0002376	immune system process	3.8e-06	0	167	1492	875	RPS6KA3,FLT3,BPI,LGALS1,KLF1,TICAM2,CAV1,IFI30,ENSBTAG00000017866,ENSBTAG00000004869,MAPK1,ENSBTAG00000046158,CLEC4E,P2RX7,C1QA,TLR7,KLF4,IGF1R,TNFSF12,HSD3B7,ENSBTAG00000020535,FUT7,VNN1,HOXB4,ENSBTAG00000011563,LTBR,STK3,FAM20C,ENSBTAG00000025250,NDRG1,EDA,FFAR2,PTPRO,ENSBTAG00000012451,ABL2,FCER1G,CD300LG,CTSH,C3AR1,MAPKAPK3,GCH1,ENSBTAG00000002096,LF,LMO4,ENSBTAG00000027513,TYROBP,NCKAP1L,MRC…	0.11193	5.41973	BP	Tuquoise
GO:0032502	developmental process	0.00053942	0	362	1492	2343	GNAQ,VDR,RXFP2,MYLK3,EPB41L3,PLCD1,EBF3,ID2,SEMA4F,CYFIP1,TIGAR,TANC1,AMOT,SYT4,TNFSF8,ENSBTAG00000005734,FZD2,LAMA5,ADRB2,BNIP2,CA2,NINJ2,S100B,CLEC5A,MAN1A2,ACO1,ADAMTS2,C1QB,SDF4,RHOA,SDC3,ANGPT4,ADAM9,APBA1,SLC39A1,JAGN1,ASCL2,ENSBTAG00000024450,LY9,HGF,SRA1,KLF15,B2M,NECTIN2,NFAM1,HSF4,TYK2,FOS,EFNB1,IL12B,GDF9,KIF5C,ADRB3,ADARB1,RYR1,CLEC1B,TPM1,DNM2,CTNNA1,OSTM1,MEF2C,NUPR1,OLFM1,ZDHHC15,N…	0.242627	3.26807	BP	Tuquoise
GO:0032501	multicellular organismal process	0.00182226	0	382	1492	2520	SSH3,MGAT1,ACRBP,ERAP1,ATP1A1,JAM3,F13A1,AREG,MED28,BCL2L2,CCKAR,KDM5B,PLCB2,MSN,MAFB,GCLM,DFNA5,NOD1,SPRED1,GPSM2,TNFRSF8,DUSP5,LARGE1,ANXA2,MAFG,KLHL3,CCDC63,BATF3,DCAF1,NFIA,PTGS2,TLR2,FAM20A,MR1,SS18L1,ENSBTAG00000030227,CD9,SPI1,ACP2,YWHAG,CDK6,F8,MAPK9,ZFPM2,LAMC1,LGMN,MFSD2A,STON2,GYS1,VLDLR,PAX8,VASH1,ENSBTAG00000008303,LINGO4,ABCA5,ATAD1,TPP1,TNFRSF1B,PAK1,ACVRL1,CARD15,SPRY1,SH3GL2,TAL1…	0.256032	2.73939	BP	Tuquoise
GO:0040011	locomotion	0.00269217	0	97	1492	489	THBS1,DPYSL2,HGF,FGR,JAGN1,PRKCD,ENSBTAG00000001483,LAMC1,ENSBTAG00000009938,TTLL1,TYK2,RET,NRP2,NDE1,NEURL1,ELMO2,PEAK1,CX3CR1,ADAM17,ARSB,S100A8,FES,APBB2,STARD13,LRP12,RHOA,CMKLR1,FZD4,CCKAR,IL17RC,CCNYL1,INSL6,CD63,SEMA4F,ID2,DOCK1,LAMA5,MAP2K1,MSN,CXCL16,TNFRSF8,CCRL2,AMOT,AXL,ANXA1,TWIST1,ENSBTAG00000027513,CCDC88A,NCKAP1L,PLXND1,C3AR1,JAM3,MMP14,PTPRO,BAMBI,FCER1G,CARMIL1,SEMA3C,ENSBTAG000…	0.0650134	2.5699	BP	Tuquoise
GO:0009987	cellular process	0.00307362	0	1014	1492	7613	SERPINB5,MCF2L,PEF1,IGF1R,PLAGL2,TTYH1,CORO1B,CTBP2,SCAMP5,BACE1,FADS6,ENSBTAG00000006140,RAB1A,ENSBTAG00000019708,ENSBTAG00000035323,OAT,GPRC5B,GNB4,PPP1R9A,CRYZ,FRMD4A,UBXN8,ACVR2A,ZDHHC9,SPG20,PTPN9,TM9SF4,PDE7B,ACOX1,NRARP,VIM,IL6R,ALDH9A1,LAMTOR3,ITGAM,GPR132,GPBAR1,ATP6V0B,FCER1G,SPHK1,FOXJ2,SCARF1,PARP3,ADORA2A,MTHFD2L,LTBR,STK3,PRKCDBP,EDA,ENSBTAG00000025250,GLUL,PDK4,PRDX5,ENSBTAG0000004…	0.679625	2.51235	BP	Tuquoise
GO:0016052	carbohydrate catabolic process	0.00411732	0	19	1492	47	ENO3,ALDOC,GPD2,ENSBTAG00000014731,PKM,PGK1,ALDOA,HK1,HK3,ADPGK,STBD1,PYGL,GALM,RBKS,NAGA,HK2,PGAM4,GM2A,SORD	0.0127346	2.38539	BP	Tuquoise
GO:0051174	regulation of phosphorus metabolic process	0.0235361	0	154	1492	901	PGAM4,PELI2,MEF2C,SPRY1,ACVRL1,CARD15,ADRB3,ADARB1,ITCH,PAK1,IL12B,ENSBTAG00000008303,GDF9,VLDLR,APP,DEPTOR,ENPP2,XDH,PKIA,WWTR1,MAP3K15,ACSL1,CHP1,NRP1,SMAD6,DOCK7,MAP3K11,ZAK,SASH1,ARL6IP5,DLC1,BTBD10,HFE,DUSP5,FZD2,GBA,CDKN1A,NOD1,SPRED1,TSPO,SH3RF1,TIGAR,GNAQ,AREG,CARD9,CD244,MAP3K6,DBNDD2,GLIPR2,MAGI3,RIPK1,ADAM9,AVPI1,HGF,ENSBTAG00000024450,FAM20A,RHOA,ANGPT4,LAMTOR2,PTGS2,KIRREL,ADRB2,ADAM…	0.103217	1.62827	BP	Tuquoise
GO:0010324	membrane invagination	0.0303663	0.02	12	1492	24	SPIRE2,SNX33,FNBP1L,RHOA,CHMP2A,SNX9,THBS1,FCER1G,AIF1,ENSBTAG00000008592,SMURF1,ARF3	0.00804289	1.51761	BP	Tuquoise
GO:0050707	regulation of cytokine secretion	0.0381629	0.02	26	1492	87	IL10,CD14,FGR,IL17RC,CLEC9A,CARD15,P2RX7,SCAMP5,CLEC4E,FFAR2,ENSBTAG00000025250,TLR5,GSDMD,TNFSF4,TWIST1,CD244,CADM1,LPL,ANXA1,CD58,CLEC5A,GPAM,ANXA4,TLR2,CLEC6A,ENSBTAG00000020535	0.0174263	1.41836	BP	Tuquoise
GO:0005576	extracellular region	6.06e-36	0	433	1492	2019	LAMTOR2,LXN,ANGPT4,C1QB,SDF4,RHOA,ADAMTS2,ACO1,CTSC,SCP2,LPL,MAN1A2,SH3BP4,CA2,SLC37A2,PDE8A,ASS1,ARF3,BLVRA,KIRREL,EHD4,ATP6V1E1,GGH,NECTIN2,TYK2,PRKCA,B2M,LDHA,CTNND1,FAH,SRA1,COL14A1,SERAC1,CLEC14A,CFP,CD86,ADAM9,PLCD1,TNFSF13,FURIN,GNAQ,PPL,SLC9A3,ITM2B,NCSTN,NQO1,FLOT2,PNPO,LAMA5,ANXA3,RAB3D,CYB5A,SYT4,AK4,CYFIP1,TSPO,DDX19B,NRN1,PRKCI,GLB1,PLA2G7,MRAS,FNBP1L,APLP2,CTSB,CHP1,EPN3,RNASE6,ARL6…	0.290214	35.2177	CC	Tuquoise
GO:0016020	membrane	6.48e-32	0	802	1492	4775	LRP4,IGSF8,OSBPL3,GNG10,PLEKHA5,SLC16A5,MOGAT1,SNTA1,NINJ1,LRRC25,TPM4,MBOAT7,PABPC1,UBAC2,LAPTM4A,P2RX7,ABO,TMCC1,CCDC8,SLC44A1,ENSBTAG00000007213,GPR108,MPC2,ENSBTAG00000011563,FUT7,RAP1B,SCN1A,OLR1,CLEC10A,ENSBTAG00000010365,EFHD1,ABL2,TP53RK,REPIN1,MYOF,ENSBTAG00000039980,HACD4,ENSBTAG00000018300,ENSBTAG00000039520,DRAM1,MARVELD1,TNFAIP8L3,ENSBTAG00000026502,NDRG1,COX7A2L,ANPEP,CPT1A,VANGL1,E…	0.537534	31.1884	CC	Tuquoise
GO:0031982	vesicle	1.63e-27	0	430	1492	2159	RNF128,LGMN,GOLM1,PGLYRP1,SPIRE2,LAMC1,GLIPR2,C1QC,TMBIM1,PANK1,ACP2,YWHAG,CD9,TIMP2,LEPROT,GLA,XPNPEP2,DMKN,FAM20A,FAM171A1,S100A11,PROSC,PCBD1,ANXA2,CD58,TNFRSF8,GBA,DCTN2,MSN,SLC39A2,GNAI2,CPNE3,BEND7,BCL2L2,GALC,ATP1A1,CD5L,LGR6,OAF,RND3,ATP6V1A,ACRBP,STXBP2,CYB5R1,ERAP1,STX2,MGAT1,EFEMP1,ATP11A,LRG1,STEAP3,LGALS8,ESAM,PTGR1,VTI1B,ABCA3,CARMIL1,SHISA5,BoLA DR-ALPHA,ALDH7A1,GDA,MPDU1,PGD,NRP1,…	0.288204	26.7877	CC	Tuquoise
GO:0071944	cell periphery	1.36e-25	0	389	1492	1924	PDCD6IP,TICAM2,SPG20,ACVR2A,ENSBTAG00000004869,ENSBTAG00000017866,PCDH19,PPP1R9A,SH3D19,GPRC5B,ECE1,ARVCF,ITGAM,CTSZ,ACVR1,SLC22A4,IL6R,VIM,SNX9,ACOX1,MCOLN1,CORO1B,TTYH1,IGF1R,MPP7,FAM26F,TLR7,RAB13,BACE1,SLC18B1,SCAMP5,ADCY6,GPR157,ATP7A,LYPD3,ATP1B3,ITGAV,BLVRB,GSDMD,TSPAN33,TMEM219,TMC1,USP4,AK1,PLSCR4,PLD1,RHOQ,ENSBTAG00000013093,PTPRO,P2RX4,ENSBTAG00000012451,SPHK1,FCER1G,NOTCH3,IGF-I,GPBAR…	0.260724	24.8666	CC	Tuquoise
GO:0009986	cell surface	4.38e-11	0	90	1492	333	BMPR2,RHOA,IL2RA,TLR2,ADGRA3,ACVR1B,ANXA2,CLEC5A,CD58,LPL,TNFRSF1A,FOLR2,ADAM17,SPIRE2,FCER1A,NFAM1,NECTIN2,B2M,CPM,SLC46A2,THBS1,CD9,CLEC9A,LY9,P2RY1,PTGFRN,P4HB,CLEC14A,ENSBTAG00000008592,CD86,TSPAN14,ITGB5,LF,ENSBTAG00000002096,DCBLD2,FURIN,AREG,LRP6,ANXA5,ITGB6,AXL,ANXA1,TYROBP,CD244,MRC1,TNFSF4,FZD1,MSN,PDIA3,AMOT,FZD4,IL17RC,LAMP1,CD63,LRFN1,NRG1,TMC1,HFE,ITGAV,NPTN,TSPAN33,PTPRK,FOLH1,PECA…	0.0603217	10.3587	CC	Tuquoise
GO:0012505	endomembrane system	2.31e-08	0	325	1492	1930	GALNT3,RAB38,AP2M1,SGPP1,PTPN2,GGA2,CHI3L1,RAB32,SEC11A,MGST3,ERLIN2,ENSBTAG00000018593,CD63,B3GNT3,REEP1,SCRG1,SLC11A1,CERS2,ATP6V0D1,ENSBTAG00000016093,EDEM2,MRC1,CCDC88A,GPC1,IFT57,PREB,OPTN,TMEM38B,SELENON,CHMP2A,CTSH,MAN1A1,NUMB,TXNDC12,THBS1,P4HB,HMOX1,GORASP2,NBR1,PAQR8,ENSBTAG00000018046,SRD5A3,TNFRSF1A,SNX30,RAB7B,GGCX,RBSN,UBAC2,OS9,SEL1L,LRPAP1,LAPTM4A,KDELR2,P2RX7,DNASE1L3,ABO,FGFRL1,…	0.217828	7.63659	CC	Tuquoise
GO:0098588	bounding membrane of organelle	2.73e-06	0	139	1492	711	NCF4,TIGAR,SCAMP1,ANXA3,GBA,FLOT2,STXBP2,ITM2B,NCSTN,HGSNAT,FURIN,ATRAID,GNAQ,ATP6V1A,SLC15A3,ACP2,TMBIM1,HK2,LEPROT,WIPI1,ATP6V1H,RILP,EHD4,ATP6V1E1,LAPTM5,GLIPR2,RETSAT,PXMP2,ANXA2,MAN1A2,ARFGAP3,LRP1,LAMTOR2,ENSBTAG00000008977,YKT6,PEX11G,PEX19,FAR2,HIP1,CLTA,GALNT1,CISD2,ST8SIA5,ICA1,HM13,ENSBTAG00000008303,GPAM,SCARB2,ANXA4,CREB3,ATAD1,RYR1,TPCN2,STARD3NL,ABCA3,BoLA DR-ALPHA,ATP11A,CLCN7,FUT…	0.0931635	5.56345	CC	Tuquoise
GO:0043235	receptor complex	0.00033967	0	41	1492	153	CHRNB1,ACVR1B,HFE,ITGAV,TNFRSF1A,ADRB2,NRN1,ENSBTAG00000007746,LRP1,TLR2,OLR1,RAMP2,NOTCH3,ABHD6,ACVR2B,GRIA3,RIPK1,INSR,B2M,APP,RET,ACVR2A,VLDLR,ITGB6,GABBR2,LRP4,ITGAL,ITGB5,RXRA,ITGAM,ACVR1,IL6R,VDR,ADRB3,LRP6,MCOLN1,ITGB1,IGF1R,CD14,TLR7,LIFR	0.0274799	3.46894	CC	Tuquoise
GO:0005737	cytoplasm	0.000356984	0	815	1492	5955	SLC17A5,PKP4,HIPK3,SPRN,MRC1,ENSBTAG00000016093,CTSH,BFSP2,TMEM38B,CAPG,PREB,Tom40B,IFT57,CD63,ACSL4,MAGI1,RAB32,SGPP1,PTPN2,AP2M1,SDHB,GALNT3,MXI1,CERS2,NAAA,SCRG1,ACSS2,REEP1,LACTB,TNFRSF1A,COQ8A,ENO3,ASAH1,ENSBTAG00000014685,SRD5A3,ACVR1B,ENSBTAG00000018046,NBR1,GORASP2,PAQR8,PLS3,MGST1,FES,ARHGAP18,GNAI1,ENSBTAG00000001483,JARID2,FUCA1,THBS1,NUMB,GALM,MAN1A1,UBQLN2,GAB1,HMOX1,PCYOX1,WDR7,NAGS…	0.546247	3.44735	CC	Tuquoise
GO:0030054	cell junction	0.000699598	0	104	1492	543	SCAMP5,MPZL1,P2RX7,NPHP1,NECTIN3,CD59,RAB13,ITGB1,MPP7,STXBP6,CORO1B,PABPC1,FSCN1,VIM,PAK1,CTNNA1,TPM4,DNM2,LAMTOR3,SNTA1,FHL3,IFI30,PARD3,CAV1,PDCD6IP,FRMD4A,FGFRL1,SCARB2,ENSBTAG00000004869,APP,TJP2,NDRG1,ESAM,PTPRK,P2RX4,CHP1,SCN1A,RAP1B,DOCK7,NRN1,SAMD4A,PKP2,NRP1,TNS3,NLRX1,ITGAV,CAPN2,CHRNB1,DLC1,PDIA3,AMOT,PKD2,FZD2,FZD1,MSN,MAGI1,CPNE3,CYFIP1,FZD4,EPB41L3,FAT1,JAM3,MMP14,ARHGAP21,ITGB5,RN…	0.0697051	3.15515	CC	Tuquoise
GO:0045177	apical part of cell	0.00218535	0	36	1492	136	CA2,CLCN5,SLC26A6,ADAM17,ADRB2,HFE,DSTYK,PLD1,PRKCI,NUMB,PTPRO,CFAP126,MPDZ,LGMN,APP,ATP6V1E1,EDA,VASH1,STXBP2,ANXA1,ENSBTAG00000017866,C2CD2L,SLC23A2,ACVR1,SLC22A4,IL6R,CD300LG,ANXA4,ATP1A1,SLC9A3,ATP6V1A,F2RL2,SLC46A1,TRPM6,GPSM2,MSN	0.0241287	2.66048	CC	Tuquoise
GO:0060089	molecular transducer activity	1.9e-14	0	128	1492	496	CADM1,MRC1,PLXND1,ITGB6,GABBR2,IFNGR1,CTSH,LRP6,C3AR1,ITGB5,ENSBTAG00000002096,F2RL2,PPARG,FZD4,RELT,PKD2,TLR5,FZD1,GPR68,CALCRL,CX3CR1,TNFRSF1A,CSF2RA,ACVR1B,ADGRL3,PAQR8,BMPR2,IL2RA,JMJD6,ENSBTAG00000007746,P2RY1,GRIA3,FCGRT,NR1H3,RET,NRP2,FCER1A,INSR,FLT3,GPRC5B,SCARB1,ACVR2A,P2RY2,LRP4,FGFRL1,SORT1,ACVR1,IL6R,HNF4A,GPR132,RXRA,MSR1,IGF1R,STAB1,PPARA,CLEC4E,THRB,GPR157,P2RX7,TLR7,OLR1,ACVR2B,E…	0.0857909	13.721	MF	Tuquoise
GO:0004871	signal transducer activity	5.31e-11	0	137	1492	599	P2RY1,FCGRT,GRIA3,GNAI1,GAB1,NRP2,RET,NR1H3,HMOX1,FCER1A,INSR,CALCRL,CX3CR1,TNFRSF1A,CSF2RA,ACVR1B,ADGRL3,PAQR8,IL2RA,BMPR2,ENSBTAG00000007746,F2RL2,GNA11,PPARG,FZD4,RELT,PKD2,MAP2K1,TLR5,FZD1,GPR68,PLXND1,MRC1,GNGT2,IFNGR1,GABBR2,CTSH,GNB1,LRP6,C3AR1,MAPKAPK3,ECM1,ENSBTAG00000002096,ACVR2B,P2RY6,GPBAR1,RAMP2,P2RX4,FCER1G,SPHK1,LTBR,STK3,ADORA2A,STK24,EDA,PLXNC1,FFAR2,DOK2,IGF1R,PPARA,THRB,MAPK1,…	0.0918231	10.275	MF	Tuquoise
GO:0005509	calcium ion binding	1.66e-09	0	84	1492	317	BMP1,TTYH1,AIF1,PEF1,STAB1,NOL3,MATN3,S100A2,EDIL3,VCAN,PRRG4,VLDLR,LDLR,S100A10,LRP4,PCDH19,MMP8,PLA2G4A,TBC1D9B,ANXA4,RYR1,CALML4,NOTCH3,MCFD2,RCN1,PCDH17,TBC1D9,PCDH7,EFEMP1,FAM20C,ENPP2,SYT5,GPD2,EDEM3,CAPN2,CAPS2,FKBP9,TBC1D8,EFHD1,CHP1,GALNT3,ENSBTAG00000008238,S100A4,ANXA3,S100A12,PLCB2,PKD2,EDEM2,ANXA5,ANXA1,C1R,SUSD1,NELL2,S100A9,FAT3,PLCD1,FSTL1,FAT1,SELENON,MMP14,THBS1,ENSBTAG000000302…	0.0563003	8.77932	MF	Tuquoise
GO:0003824	catalytic activity	4.48e-05	0	553	1492	3785	OSGEP,POR,SMYD2,LF,GCH1,IDH1,HSPA6,ENSBTAG00000012090,PDIA3,EXO5,ISCU,HMBS,SPTSSA,MAP2K1,IDS,PDIA5,CYBB,NAGA,RBKS,SLC3A2,C15orf48,GRK3,JMJD6,GZMA,ABCA6,MTM1,GUCY2C,PIR,ARSB,ALDOC,ENSBTAG00000014731,MANBA,FBXO18,PKM,AHCY,DIP2C,PLOD1,SMURF1,PRKCD,CPT2,ACE,PGK1,LIPA,RAB31,ACVR1,KDM1B,CTSZ,ECE1,NHLRC1,FLT3,CDC42BPB,ADCY6,TBXAS1,RAB13,PGM2,CBR3,TAF9B,SAP30,RHOQ,FKBP5,PLD1,HSD3B7,AK1,FDFT1,OSGIN1,ATP7A…	0.370643	4.34858	MF	Tuquoise
GO:0004553	hydrolase activity, hydrolyzing O-glycosyl compounds	0.00941795	0	19	1492	54	MANBA,LYZ,ACER3,ENSBTAG00000000483,EDEM2,MAN1A2,BEND4,EDEM3,GLB1,ENSBTAG00000015512,GALC,NAGA,GLA,MAN1A1,GLB1L,FUCA1,ENSBTAG00000026088,GBA,GM2A	0.0127346	2.02604	MF	Tuquoise
GO:0005488	binding	0.0203262	0	917	1492	6909	GPATCH3,CREB3L2,NF1,ATP6V0A1,TMED9,ENSBTAG00000020535,RETN,EXT1,ENSBTAG00000006785,ENSBTAG00000013343,NRG1,CHPT1,CREBL2,AGTPBP1,RAB9A,JAKMIP3,HLCS,TTLL7,ANKLE2,ZC3H12C,TBC1D9,FOLH1,ASCL4,SH3GL3,LAMTOR1,RNASE4,ENSBTAG00000019266,ZBTB47,FGFRL1,MYO16,CAV1,KLF1,SCARB1,STK32C,ATP6V1B2,FSCN1,EXD2,SORT1,CREG1,ALDH1A1,LRPAP1,OS9,RASD2,ENSBTAG00000003261,STAB1,MYO1F,TNFSF12,S100A2,ME1,KDELR2,NLRP13,EDIL3,…	0.614611	1.69194	MF	Tuquoise
GO:0019842	vitamin binding	0.0409862	0	21	1492	69	PROSC,CSAD,PDXK,FOLR2,OAT,ENSBTAG00000007700,PNPO,MOCOS,GPT2,P4HA1,VDR,TCN2,HLCS,PDXDC1,TMLHE,SLC46A1,PYGL,SPTLC2,PLOD1,ALAS1,ABAT	0.0140751	1.38736	MF	Tuquoise
GO:0050768	negative regulation of neurogenesis	0.0447419	0.14	5	57	93	DLL1,GPR173,PBX1,WNT5A,SEMA3G	0.0877193	1.34929	BP	Violet
GO:0071944	cell periphery	0.000622632	0	23	57	1924	GPR173,CNTNAP1,ENAH,PLCL1,C1orf186,DLL1,BLK,SLC34A3,L1CAM,SYTL3,TIE1,CPNE7,NCAM2,TNFRSF9,CSPG4,INSRR,ENPP1,RGS17,DBN1,ENSBTAG00000005077,ENSBTAG00000017512,GPR35,OSBPL6	0.403509	3.20577	CC	Violet
GO:0005102	receptor binding	0.00999828	0.08	11	57	626	LAMA4,ENPP1,SEMA3G,SLC27A2,ENSBTAG00000005077,PLCL1,BLK,DLL1,SYTL3,WNT5A,DOK7	0.192982	2.00007	CC	Violet
GO:0010468	regulation of gene expression	0.0256025	0.02	156	630	2213	ZNF554,ENSBTAG00000010046,SPRY2,ZNF641,JADE1,KDM5A,UBAP2,GCLC,NFYA,AATF,CAPRIN2,ZKSCAN7,YEATS2,ENSBTAG00000010291,TP53BP1,CAMTA1,ENSBTAG00000040336,TGFB3,NEUROG2,CD38,ELP3,ZNF383,ZNF527,ZNF263,HEATR1,ZSCAN23,ENSBTAG00000005691,SMG8,PKIG,GPC3,SNRNP70,XRCC6,LAMP3,ZNF623,ZNF580,ZNF268,ZMYM4,THRAP3,KDM1A,ZNF214,ENSBTAG00000021742,HP1BP3,ZNF202,GRHL3,RBM17,ZFP3,ZNF445,AMH,H2AFY2,ZNF311,EXOSC2,MGA,IL7,…	0.247619	1.59172	BP	Yellow
GO:0051171	regulation of nitrogen compound metabolic process	0.0289257	0.02	157	630	2235	ABT1,ZNF300,DKC1,PAF1,IL23A,FAM175A,PDGFA,EGR3,UBE2V1,FHIT,MSH6,ATRX,EPCAM,NUDT16,WDR77,ZNF713,ZFP57,CIART,PROX1,NKAPL,RIOK1,ERCC6,ZNF789,FOXB1,ZNF514,EED,FBXW7,ENSBTAG00000015584,PHF20,RBM4,ENSBTAG00000003267,RWDD3,BDP1,ENSBTAG00000016533,IKZF1,ago-01,ENSBTAG00000020356,ZNF215,ZNF382,C3orf33,RBM20,PRDM4,ZNF197,CDK5RAP1,CREB1,POGK,ZSCAN12,NKX3-1,NFATC3,ZEB1,ENSBTAG00000008902,NVL,MET,ZNF45,PLAGL1…	0.249206	1.53872	BP	Yellow
GO:2000112	regulation of cellular macromolecule biosynthetic process	0.0423493	0.02	143	630	2010	EPCAM,ATRX,WDR77,PDGFA,EGR3,UBE2V1,IL23A,FHIT,DKC1,PAF1,ZNF300,ABT1,RBM4,PHF20,FBXW7,ENSBTAG00000015584,RWDD3,ENSBTAG00000003267,ZNF514,EED,ZNF789,NKAPL,ERCC6,FOXB1,ZNF713,PROX1,CIART,ZFP57,POGK,NFATC3,ZEB1,ENSBTAG00000008902,ZSCAN12,NKX3-1,ZNF197,PRDM4,CDK5RAP1,CREB1,ENSBTAG00000016533,IKZF1,ago-01,ZNF215,ENSBTAG00000020356,C3orf33,ZNF382,BDP1,TINF2,EXOSC10,SNAPC5,TSC22D2,NEUROD4,OTULIN,MEF2B,ZN…	0.226984	1.37315	BP	Yellow
GO:0005488	binding	0.00312795	0	409	630	6909	HEATR1,PDE6D,ZNF263,ZNF527,TEX14,FGD5,IQCB1,CYP2U1,TDP1,PPEF1,GPC3,ZBTB10,CLCF1,EME1,THRAP3,ZNF580,THAP9,ZNF202,NUP50,ZBTB9,MTHFSD,ENSBTAG00000021742,ZNF214,GNA13,ENSBTAG00000040244,TRIM10,RBM28,GCLC,ENSBTAG00000010046,SYT7,PAK3,SPIRE1,TRUB2,OCLN,TYW1,MOB3B,MLF1,MSRB2,CAPRIN2,AATF,MYLIP,ZNF383,CAMTA1,ARHGEF28,MSH4,TRAF5,PIKFYVE,ZNF346,HBEGF,ZNF174,ZNF184,MYH10,EIF4ENIF1,SRBD1,ENSBTAG00000031186,N…	0.649206	2.50474	CC	Yellow
GO:0001071	nucleic acid binding transcription factor activity	0.00754898	0	54	630	580	KDM1A,ESR1,ZNF789,CTCF,ZMYM4,ZNF268,ZNF623,FOXB1,ENSBTAG00000010255,ZSCAN31,ZNF202,ZNF45,PROX1,PLAGL1,ENSBTAG00000021742,ESR2,ZSCAN23,ZNF263,TSC22D2,PHF20,SNAPC5,ZNF174,ZNF184,ENSBTAG00000003267,MEF2B,NRF1,ZNF227,ZKSCAN7,IKZF1,ENSBTAG00000016533,ZSCAN16,NR4A3,ZNF382,MGA,ZNF215,ZNF383,NUCKS1,ZNF300,ENSBTAG00000040336,CAMTA1,ZNF445,ZFP3,ENSBTAG00000008902,NFATC3,KDM5A,ZNF641,ZEB1,NKX3-1,ZSCAN12,GRH…	0.0857143	2.12211	CC	Yellow

## Sheet: Supplementary Table 4
Supplementary Table 4. David functional cluster analysis of genes in significantly correlated modules: i) genes in all negatively correlated modules (black and turquoise), ii) gene in all positively correlated modules (yellow, orangew, midnightblue, darkred, violet).
i) Negatively correlated modules							ii) Positively correlated modules
Term	PValue	Genes	Fold Enrichment	FDR	Cluster*		Term	PValue	Genes	Fold Enrichment	FDR	Cluster*
Membrane	1.87628e-34	OXA1L, SGMS2, AIF1, ISG12(B), FAM210B, SLC52A2, TMEM141, DGAT2L6, APP, MED28, LTB4R, VNN1, JAGN1, AIG1, MFSD13A, LIFR, LPCAT3, JUP, NPC1, BOLA-DMA, BACE2, BOLA-DMB, BACE1, RYR1, ROR2, DCBLD2, ORAI1, DCBLD1, SCN1A, BCL2L2, TMEM129, LFNG, LAPTM4B, ACER3, LAPTM4A, ATP11A, GUCY2C, VDAC1, GNGT2, ARF1, AREG, SPNS1, CACHD1, KCNAB2, LDLR, AP2S1, RNF185, ATP10D, LY9, SIRPB1, TMEM109, ST6GALNAC4, C18H19ORF…	1.38718	2.61894e-31	Cluster1:Enrichment Score: 29.73		IPR001909:Krueppel-associated box	6.82332e-21	ZNF19, ZKSCAN7, ZNF389, ZNF12, ZNF202, ZNF10, ZKSCAN2, ZNF345, ZKSCAN4, ZNF350, ZNF182, ZNF300, ZFP90, ZNF394, ZNF445, ZNF641, ZNF45, ZNF283, ZNF354C, ZNF814, ZNF792, ZNF793, ZNF688, ZNF140, ZNF891, ZNF789, POGK, ZNF197, ZNF135, ZNF383, ZNF713, ZNF432, ZNF382, ZNF436, ZNF555, ZNF554, ZNF655, ZNF514, ZNF34, ZNF331, ZNF169, ZNF227, ZNF286A, ZNF599, ZNF268, ZNF605, ZNF527, ZNF263, LOC613546, ZFP57, …	3.77989	1.17066e-17	Cluster1: Enrichment Score: 16.18
Transmembrane helix	2.38734e-31	HGSNAT, OXA1L, SGMS2, ISG12(B), SLC9A3, MPV17, ANKLE2, SLC52A2, FAM210B, TMEM141, DGAT2L6, ADTRP, APP, KCNK9, LTB4R, JAGN1, ADAM9, TYRO3, PTPRK, PTPRG, AIG1, MFSD13A, LIFR, TMEM132A, ERGIC1, LPCAT3, PTPRO, SIRPA, NPC1, BOLA-DMA, BACE2, BOLA-DMB, BACE1, RYR1, ROR2, DCBLD2, GGCX, ORAI1, DCBLD1, SCN1A, HFE, BCL2L2, ACP2, MANSC1, ATP6V0B, TMEM129, ADRB3, PVRL1, ZDHHC9, LFNG, LAPTM4B, ACER3, LAPTM4A, …	1.4271	3.33229e-28	Cluster1:Enrichment Score: 29.73		IPR013087:Zinc finger C2H2-type/integrase DNA-binding domain	2.27015e-20	ZNF389, ZNF827, ZNF304, ZNF182, ZNF774, ZNF300, ZFP90, ZNF397, PATZ1, ZNF394, ZNF445, ZNF391, ZNF641, ZNF45, ZNF507, ZNF502, ZNF792, ZNF793, ZNF789, PRDM4, ZNF197, ZNF383, ZNF432, ZNF382, ZNF436, ZNF514, ZNF331, PLAGL1, ZNF227, ZNF599, PLAG1, ZNF527, ZNF623, KLF8, ZBTB46, KLF12, IKZF1, ZBTB41, ZSCAN2, ZBTB43, ZNF215, ZNF311, ZNF214, JAZF1, HIVEP2, ZNF19, ZKSCAN7, ZBTB39, ZNF12, ZNF202, CTCF, ZEB1…	2.5053	3.89483e-17	Cluster1: Enrichment Score: 16.18
Transmembrane	2.50145e-31	HGSNAT, OXA1L, SGMS2, ISG12(B), SLC9A3, MPV17, ANKLE2, SLC52A2, FAM210B, TMEM141, DGAT2L6, ADTRP, APP, KCNK9, LTB4R, JAGN1, ADAM9, TYRO3, PTPRK, PTPRG, AIG1, MFSD13A, LIFR, TMEM132A, ERGIC1, LPCAT3, PTPRO, SIRPA, NPC1, BOLA-DMA, BACE2, BOLA-DMB, BACE1, RYR1, ROR2, DCBLD2, GGCX, ORAI1, DCBLD1, SCN1A, HFE, BCL2L2, ACP2, MANSC1, ATP6V0B, TMEM129, ADRB3, PVRL1, ZDHHC9, LFNG, LAPTM4B, ACER3, LAPTM4A, …	1.42587	3.49157e-28	Cluster1:Enrichment Score: 29.73		IPR007087:Zinc finger, C2H2	1.8999e-19	ZNF389, ZNF827, RBM5, ZNF304, ZNF182, ZNF774, ZNF300, ZFP90, ZNF397, PATZ1, ZNF445, ZNF394, ZNF391, ZNF641, ZNF45, ZNF507, ZNF502, ZNF792, ZNF793, ZNF789, PRDM4, ZNF197, ZNF383, ZNF432, ZNF382, ZNF436, ZNF514, ZNF512, ZNF331, PLAGL1, ZNF227, CASZ1, ZNF599, PLAG1, ZNF527, ZNF623, KLF8, ZBTB46, IKZF1, KLF12, ZBTB41, ZSCAN2, ZBTB43, ZNF215, ZNF311, ZNF214, JAZF1, HIVEP2, ZNF385B, GPATCH8, ZKSCAN7, Z…	2.29185	3.2596e-16	Cluster1: Enrichment Score: 16.18
GO:0016021~integral component of membrane	1.01174e-24	HGSNAT, OXA1L, ISG12(B), SLC9A3, MPV17, FAM210B, TMEM141, DGAT2L6, APP, ADTRP, JAGN1, ADAM9, TYRO3, PTPRK, PTPRG, AIG1, MFSD13A, LIFR, TMEM132A, ERGIC1, LPCAT3, PTPRO, SIRPA, BOLA-DMA, BACE2, BOLA-DMB, ROR2, GGCX, ORAI1, DCBLD1, HFE, BCL2L2, ACP2, MANSC1, ATP6V0B, TMEM129, ZDHHC9, LAPTM4B, LAPTM4A, MAOA, ATP11A, SPTSSA, ACPT, GUCY2C, PCDH17, PCDH19, VDAC1, SYNE3, CD300A, CD209, AREG, SPNS1, CHRNE…	1.40608	1.50488e-21	Cluster1:Enrichment Score: 29.73		GO:0003676~nucleic acid binding	1.00996e-18	ZNF389, ZNF827, RNASEH1, EEF1AKMT1, ZNF304, ZNF182, ZNF774, ZNF300, RAVER2, DDX25, TARDBP, ZNF397, ZNF445, ZNF391, PABPN1, PAN2, ZNF641, ZNF45, ZNF507, ZNF814, ZNF502, EXD1, ZNF789, ZNF197, CELF6, TIAL1, ZNF383, ZNF432, SCAF8, ZNF382, ZNF436, ARPP21, ENPP1, MYEF2, ZNF514, ZNF331, ZNF227, DDX46, MTERF2, ZNF599, NKRF, ZNF527, ZNF623, KLF8, ZBTB46, LOC613546, ZNF830, ZBTB41, DDX5, ZNF215, ZNF311, ZN…	2.27686	1.56807e-15	Cluster1: Enrichment Score: 16.18
Signal	4.34042e-36	A2M, PTGS2, SLC9A3, FSTL1, FAM210B, SLC52A2, APP, VNN1, SH3GL3, TYRO3, PTPRK, CRTAP, F8, TMEM132A, SIRPA, RETN, NPC1, NPC2, F5, BOLA-DMA, BACE2, BACE1, BOLA-DMB, ROR2, CD164L2, EIF2AK3, ADAMTS2, TNFRSF6B, NAGLU, HFE, PPT2, ACP2, PPT1, MANSC1, NAGA, PLTP, GGH, ACPT, GAS1, HGF, PCDH17, GUCY2C, EMILIN2, PCDH19, EMILIN1, C15H11ORF94, CD300A, AREG, CHRNE, ASIP, LOC783680, SGSH, PDIA3, LDLR, NAAA, PDIA…	1.69384	6.05843e-33	Cluster2: Enrichment Score: 19.87		IPR015880:Zinc finger, C2H2-like	1.1026e-18	ZNF389, ZNF827, ZNF304, ZNF182, ZNF774, ZNF300, ZFP90, ZNF397, PATZ1, ZNF394, ZNF445, ZNF391, ZNF641, ZNF45, ZNF507, ZNF502, ZNF792, ZNF793, ZNF789, PRDM4, ZNF197, ZNF383, ZNF432, ZNF382, ZNF436, ZNF514, ZNF512, ZNF331, PLAGL1, ZNF227, CASZ1, ZNF599, PLAG1, ZNF527, ZNF623, ZBTB46, IKZF1, KLF12, ZBTB41, ZSCAN2, ZBTB43, ZNF215, ZNF311, ZNF214, JAZF1, HIVEP2, ZNF385B, ZNF19, ZKSCAN7, ZBTB39, ZNF12, …	2.31413	1.89171e-15	Cluster1: Enrichment Score: 16.18
Disulfide bond	1.01176e-27	ADGRA3, A2M, GDF1, ATP1B3, PTGS2, CADM1, NELL2, FSTL1, EDIL3, DNASE1L3, DNASE1L1, CD44, GDF9, CLEC4D, CFI, CFD, ADAM9, TYRO3, BOLA, SIRPA, C1QA, RETN, C1QB, CD36, NPC2, LPAR5, F5, BOLA-DMA, GPBAR1, BACE1, CX3CR1, BOLA-DMB, ABAT, ROR2, LAMC1, EXT1, ADAMTS2, GGCX, TMX1, CRELD1, ENPP2, HFE, IFI30, PPT2, FCGRT, ACP2, PPT1, ADRB3, LGALS3BP, PVRL1, NAGA, FCER1G, CLEC6A, LFNG, TYROBP, CFB, PMEL, CHI3L1,…	1.82631	1.41223e-24	Cluster2: Enrichment Score: 19.87		SM00349:KRAB	4.89438e-18	ZNF19, ZNF389, ZNF12, ZNF202, ZNF10, ZKSCAN2, ZNF345, ZKSCAN4, ZNF350, ZNF182, ZNF300, ZFP90, ZNF394, ZNF445, ZNF641, ZNF45, ZNF283, ZNF354C, ZNF814, ZNF792, ZNF793, ZNF688, ZNF140, ZNF891, ZNF789, POGK, ZNF135, ZNF197, ZNF383, ZNF713, ZNF432, ZNF382, ZNF436, ZNF555, ZNF554, ZNF655, ZNF514, ZNF34, ZNF331, ZNF169, ZNF227, ZNF286A, ZNF599, ZNF268, ZNF605, ZNF263, LOC613546, ZFP57, ZNF667, ZFP1, ZNF…	3.36856	6.83413e-15	Cluster1: Enrichment Score: 16.18
Glycoprotein	2.44e-16	A2M, PTGS2, ATP1B3, NELL2, FSTL1, AQP1, DNASE1L1, BRINP1, PLOD1, CD44, LTB4R, VNN1, GDF9, GGTA1, SIRPA, TMEM150B, C1QA, JUP, C1QB, NPC2, CD36, F5, LPAR5, GPBAR1, BACE1, EXT1, ADAMTS2, CRELD1, ENPP2, IFI30, PPT2, ACP2, PPT1, NRN1, ADRB3, SLC11A1, ACE, LGALS3BP, NAGA, CLEC6A, LFNG, TM2D2, CFB, PMEL, CHI3L1, GGH, HGF, CD63, CHRNB1, CLEC7A, ASIP, CHRNE, SLC46A1, MSR1, LDLR, ARSK, ANPEP, CD151, SLC26A…	1.66123	3.10862e-13	Cluster2: Enrichment Score: 19.87		SM00355:ZnF_C2H2	1.65184e-15	ZNF389, ZNF827, ZNF304, ZNF182, ZNF774, ZNF300, ZFP90, ZNF397, PATZ1, ZNF394, ZNF445, ZNF391, ZNF641, ZNF45, ZNF507, ZNF502, ZNF792, ZNF793, ZNF789, PRDM4, ZNF197, ZNF383, ZNF432, ZNF382, ZNF436, ZNF514, ZNF512, ZNF331, PLAGL1, ZNF227, CASZ1, ZNF599, PLAG1, ZNF527, ZNF623, ZBTB46, IKZF1, KLF12, ZBTB41, ZSCAN2, ZBTB43, ZNF215, ZNF311, ZNF214, JAZF1, HIVEP2, ZNF385B, ZNF19, ZKSCAN7, ZBTB39, ZNF12, …	2.07516	2.32037e-12	Cluster1: Enrichment Score: 16.18
signal peptide	8.17216e-16	GNPTG, F2RL2, MPZL1, PTGS2, LGMN, ATP6AP1, NELL2, PGLYRP1, TLR2, FSTL1, DSE, IL10, DNASE1L1, BRINP1, CD44, PLOD1, VNN1, GDF9, CFD, CUTA, BOLA, CST3, MFGE8, TCN2, SIRPA, TMEM150B, C1QA, C1QB, RETN, NPC2, LYNX1, CPE, F5, BOLA-DMA, BOLA-DQA5, BOLA-DMB, BACE1, NEU1, KDSR, ADAMTS2, TMX1, ITGAL, PAM, CCL3, ACHE, CRELD1, ENPP2, BLA-DQB, PAMR1, ITGB5, PPT2, CTSA, PPT1, ACP2, ITGB2, CNPY4, TIMP2, NRN1, FX…	1.70466	1.34337e-12	Cluster2: Enrichment Score: 19.87		GO:0006355~regulation of transcription, DNA-templated	6.74967e-11	FHIT, IL16, PTTG1, PNN, CSNK2A2, ZNF304, USP27X, ZNF182, CDCA7, ZNF300, ZNF397, EED, PHTF1, ZNF391, CHTOP, ZNF45, ZNF814, ZNF502, ZNF792, ZNF793, RALGAPA1, ZNF789, PRDM4, ZNF197, ZNF383, ZNF432, VGLL4, TFB1M, RNF20, ZNF382, ZNF436, ZNF514, ZMYND8, ZNF331, ZNF512, ZNF227, MTERF2, ZNF599, AXIN2, ZNF527, NKRF, ZNF623, LOC613546, SMAD2, NEUROG2, SFMBT1, ZSCAN2, SFMBT2, ZNF311, ZNF214, HIVEP2, SCMH1, …	1.86328	1.22294e-07	Cluster1: Enrichment Score: 16.18
glycosylation site:N-linked (GlcNAc...)	1.29597e-15	GNPTG, F2RL2, A2M, MPZL1, ATP1B3, PTGS2, LGMN, ATP6AP1, NELL2, TLR2, FSTL1, AQP1, DSE, IL10, DNASE1L1, BRINP1, CD44, PLOD1, LTB4R, VNN1, GDF9, ASPH, GGTA1, FUT10, PNPLA2, TCN2, SIRPA, TECR, TMEM150B, C1QA, NPC2, CD36, CPE, F5, LPAR5, GPBAR1, SLC37A2, BACE1, NEU1, EDA, EMP3, EXT1, ADAMTS2, XDH, ITGAL, PAM, ACHE, CRELD1, ENPP2, BLA-DQB, PAMR1, ITGB5, PPT2, TMEM219, CTSA, PPT1, ITGB2, ACP2, ITGB1, I…	1.64679	2.29816e-12	Cluster2: Enrichment Score: 19.87		GO:0046872~metal ion binding	1.26859e-09	ALAD, STK38, ZNF389, ZNF827, SPRTN, ZNF304, ZNF182, ZNF300, ZNF774, ZFP90, ZNF397, PATZ1, ZNF445, ZNF394, ZNF391, ZNF641, NUDT17, ZNF45, NUDT12, ZNF507, GTPBP8, ZNF502, ZNF792, ZNF793, ZNF789, PRDM4, ZNF197, ZNF383, ZNF432, UNC13B, ZNF382, ZNF436, ZNHIT3, ELAC1, ADHFE1, ENPP1, ARHGEF28, ZNF514, TIMP3, ZC3H6, ZNF512, ZNF331, PLAGL1, ZNF227, CASZ1, MBNL3, ZNF599, FGD5, DHX57, ZC3H14, ZNF527, PLAG1,…	1.50416	1.96962e-06	Cluster1: Enrichment Score: 16.18
disulfide bond	4.63314e-12	F2RL2, A2M, MPZL1, ATP1B3, PTGS2, NELL2, PGLYRP1, TLR2, FSTL1, IL10, DNASE1L1, CD44, GDF9, CFD, CST3, MFGE8, TCN2, SIRPA, C1QA, C1QB, RETN, NPC2, LYNX1, CD36, F5, LPAR5, GPBAR1, CX3CR1, BACE1, ADAMTS2, XDH, GGCX, TMX1, ITGAL, PAM, CCL3, ACHE, CRELD1, ENPP2, BLA-DQB, PAMR1, ITGB5, PPT2, CTSA, PPT1, ACP2, ITGB2, CNPY4, TIMP2, ITGB1, ADRB3, LGALS3BP, ECE1, NMRAL1, ITGAV, ITGB6, P2RY1, NAGA, FCER1G, …	1.69001	7.98571e-09	Cluster2: Enrichment Score: 19.87		Zinc-finger	1.26979e-10	ZNF389, UTRN, RBM4, RBM5, TRIM52, SPRTN, RORA, ZNRF1, MKRN2, ZNF182, ZNF300, TRIM44, ZFP90, GATA3, TRIM45, ZNF397, RABGEF1, ZNF445, ZNF394, ZNF641, ZNF45, ZNF792, ZNF793, TRIM36, ZNF789, BAZ1B, ZNF197, ZNF383, ZZZ3, ZNF432, RNF20, ZNF382, ZNHIT3, ZNF436, ZFAND5, ZNF514, ZFAND1, ZMYND8, ZNF512, ZNF331, PLAGL1, TRIM66, ZNF227, ZNF599, FGD5, TRAF5, ZC3H14, ZNF527, PLAG1, SHPRH, TAF3, ZMYM5, NR4A2, R…	1.67714	1.70697e-07	Cluster2: Enrichment Score: 7.01
transmembrane region	3.34574e-11	OXA1L, ATP1B3, QPCTL, VAPB, CNPPD1, MPV17, DNAJB12, AQP1, SLC35A2, TMEM141, SLC35A4, DGAT2L6, APP, CD44, LTB4R, INSIG1, PSENEN, C3H1ORF43, JAGN1, SAYSD1, GGTA1, MFSD13A, VTI1B, DHRS7B, SIRPA, LPCAT3, TMEM150B, CD36, LHFPL4, LPAR5, GPBAR1, BACE1, CX3CR1, TMEM184B, TMEM184C, EXT1, GGCX, TMX1, CRELD1, ACP2, ATP6V0B, TMEM129, ADRB3, SLC11A1, ZDHHC9, FCER1G, LFNG, TYROBP, LAPTM4B, LAPTM4A, TM2D2, MAOA…	1.40088	5.7667e-08	Cluster3: Enrichment Score: 7.32		GO:0046872~metal ion binding	1.26859e-09	ALAD, STK38, ZNF389, ZNF827, SPRTN, ZNF304, ZNF182, ZNF300, ZNF774, ZFP90, ZNF397, PATZ1, ZNF445, ZNF394, ZNF391, ZNF641, NUDT17, ZNF45, NUDT12, ZNF507, GTPBP8, ZNF502, ZNF792, ZNF793, ZNF789, PRDM4, ZNF197, ZNF383, ZNF432, UNC13B, ZNF382, ZNF436, ZNHIT3, ELAC1, ADHFE1, ENPP1, ARHGEF28, ZNF514, TIMP3, ZC3H6, ZNF512, ZNF331, PLAGL1, ZNF227, CASZ1, MBNL3, ZNF599, FGD5, DHX57, ZC3H14, ZNF527, PLAG1,…	1.50416	1.96962e-06	Cluster2: Enrichment Score: 7.01
topological domain:Cytoplasmic	6.61175e-09	F2RL2, MPZL1, ATP1B3, VAPB, TLR2, AQP1, APP, CD44, LTB4R, INSIG1, PSENEN, JAGN1, ASPH, GGTA1, SCAMP5, ATG9A, FUT10, VTI1B, PNPLA2, DHRS7B, SIRPA, TMEM150B, CD36, LPAR5, GPBAR1, CX3CR1, BACE1, KDSR, EDA, EXT1, GGCX, TMX1, ITGAL, PAM, STX8, CAV1, CRELD1, BLA-DQB, ITGB5, ITGB2, ACP2, ITGB1, FXYD6, ATP6V0B, G6PC3, ADRB3, SLC11A1, TMEM129, ECE1, CERS2, ITGAV, ITGB6, TTYH1, P2RY1, ZDHHC9, FCER1G, NRROS…	1.49734	1.1396e-05	Cluster3: Enrichment Score: 7.32		Zinc	2.61804e-07	ALAD, ZNF389, UTRN, RBM4, RBM5, TRIM52, SPRTN, RORA, ZNRF1, MKRN2, ZNF182, ZNF300, TRIM44, ZFP90, GATA3, TRIM45, ZNF397, RABGEF1, ZNF445, ZNF394, ZNF641, ZNF45, CA12, ZNF792, ZNF793, TRIM36, NAPEPLD, ZNF789, BAZ1B, ZNF197, ZNF383, ZZZ3, ZNF432, RNF20, UNC13B, ZNF382, ZNF436, ZNHIT3, ZFAND5, ELAC1, ARHGEF28, ZNF514, TIMP3, ZFAND1, ZMYND8, ZNF512, ZNF331, PLAGL1, TRIM66, ZNF227, ZNF599, FGD5, TRAF5…	1.44146	0.000351941	Cluster2: Enrichment Score: 7.01
topological domain:Extracellular	0.000480786	F2RL2, SLC16A13, SLC27A1, MPZL1, MSR1, LDLR, ATP1B3, TLR2, GJA1, AQP1, CXADR, CD151, SLC26A2, SLC1A5, APP, CD44, LTB4R, CALCRL, FCGR3A, SCAMP5, MMP14, SIRPA, TMEM150B, LRRC25, CD163, CLEC1A, ACVR2A, ADRB2, ACVR2B, CD36, GPBAR1, LPAR5, TMEM182, CX3CR1, CD81, BACE1, PPM1L, EDA, ACVR1, TMX1, ITGAL, CRELD1, SLC39A13, ABHD6, BLA-DQB, ITGB5, ITGB2, GPR68, TMEM256, CLDN12, FXYD6, ITGB1, CD9, IGF1R, TMEM…	1.37319	0.825452	Cluster3: Enrichment Score: 7.32		Metal-binding	0.00203611	ALAD, ZNF389, UTRN, RNASEH1, SPRTN, RORA, ZNRF1, ZFP90, ZNF397, ZNF394, SCD5, NUDT16, ZNF641, NUDT17, ZNF45, NUDT12, GTPBP8, ZNF792, ZNF793, ZNF789, NAPEPLD, BAZ1B, ZNF383, ZZZ3, UNC13B, ZNF382, ZNHIT3, ARHGEF28, ZNF514, ZNF512, PLAGL1, ZNF227, DHX57, ZC3H14, PLAG1, ZNF527, MGAT4A, ADPRM, ADAL, ACACA, RNF207, SMAD2, ZSCAN2, ZNF215, CDC42BPG, SRSF7, ZNF214, CYP2R1, TLL2, ZNF19, ZNF12, SOBP, PHF20,…	1.19335	2.70273	Cluster2: Enrichment Score: 7.01
bta00010:Glycolysis / Gluconeogenesis	1.74389e-07	ALDOA, LDHA, ADPGK, ALDOC, HK2, PGAM1, HK1, ACSS2, ALDH3A2, G6PC3, PKM, GALM, TPI1, ENO3, GAPDH, ENO1, PFKM, PCK2, ALDH3B1, PGM2, ALDH7A1, ALDH1B1, PGM1, PKLR, ALDH2, PGK1, ALDH9A1	2.69049	0.000231708	Cluster4: Enrichment Score: 3.94		IPR003309:Transcription regulator SCAN	1.09329e-07	ZNF263, ZKSCAN7, ZNF389, ZNF24, ZNF202, ZSCAN2, ZKSCAN2, ZNF174, ZKSCAN4, ZNF215, ZSCAN31, ZNF197, ZSCAN26, ZNF397, ZSCAN16, ZNF394, ZNF445, ZSCAN12	4.09038	0.000187573	Cluster3: Enrichment Score: 6.83
Glycolysis	5.20426e-06	ALDOA, ADPGK, ALDOC, HK2, PGAM1, HK1, PFKM, PKM, TPI1, HK3, PKLR, ENO3, PGK1, GAPDH, ENO1	3.52168	0.00726395	Cluster4: Enrichment Score: 3.94		IPR008916:Retrovirus capsid, C-terminal	1.09329e-07	ZNF263, ZKSCAN7, ZNF389, ZNF24, ZNF202, ZSCAN2, ZKSCAN2, ZNF174, ZKSCAN4, ZNF215, ZSCAN31, ZNF197, ZSCAN26, ZNF397, ZSCAN16, ZNF394, ZNF445, ZSCAN12	4.09038	0.000187573	Cluster3: Enrichment Score: 6.83
GO:0006096~glycolytic process	0.000200056	ALDOA, TPI1, ADPGK, HK3, ALDOC, PGAM1, HK2, HK1, ENO3, PGK1, GAPDH, ENO1	3.24582	0.37356	Cluster4: Enrichment Score: 3.94		SM00431:SCAN	2.68563e-07	ZNF263, ZKSCAN7, ZNF389, ZNF24, ZNF202, ZSCAN2, ZKSCAN2, ZNF174, ZKSCAN4, ZNF215, ZSCAN31, ZNF197, ZSCAN26, ZNF397, ZSCAN16, ZNF394, ZNF445, ZSCAN12	3.79447	0.000375	Cluster3: Enrichment Score: 6.83
bta01200:Carbon metabolism	0.00220747	ME1, ALDOA, ME3, TALDO1, ADPGK, ALDOC, PGD, HK2, PGAM1, HK1, ECHS1, ACSS2, ACAT2, PKM, MTHFR, TPI1, MCEE, IDH1, ENO3, CAT, GPT2, GAPDH, ENO1, SHMT1, DLST, ACADS, ACO1, TKT, PFKM, SDHB, G6PD, SDHC, PKLR, PGK1	1.63691	2.89359	Cluster4: Enrichment Score: 3.94		GO:0000166~nucleotide binding	2.44466e-06	FHIT, NT5C3B, RBM4, RBM5, RBM6, CRCP, GDPGP1, RBM4B, RAVER2, TIA1, TARDBP, RBMS2, ACIN1, RBM12, PABPN1, RBM41, RBM43, RBFOX3, SLTM, LARP6, TRNAU1AP, CELF6, ABT1, TIAL1, RBMX2, CPSF6, GUCY1B3, RBM39, SCAF8, ENOX1, RBM33, SRSF11, MYEF2, IGF2BP3, EXOSC10, TNRC6C, CHD1L, SNRNP70, RBM28, RBM26, RBM23, RBM12B, RBM20, MTHFSD, HNRNPDL, RCAN3, RBMX, LARP4B, UPF3A, SRSF2, SRSF5, SRSF4, UPF3B, SRSF7, SRSF6,…	1.82223	0.00379553	Cluster4: Enrichment Score: 5.05
bta01230:Biosynthesis of amino acids	0.045698	ALDOA, SHMT1, TALDO1, NAGS, ASS1, ACO1, ALDOC, PGAM1, TKT, PFKM, PKM, GLUL, TPI1, PKLR, ENO3, IDH1, PGK1, GPT2, GAPDH, ENO1	1.5303	46.2859	Cluster4: Enrichment Score: 3.94		IPR012677:Nucleotide-binding, alpha-beta plait	2.8932e-06	RBM4, RBM5, RBM6, RBM4B, RAVER2, TIA1, TARDBP, RBMS2, ACIN1, RBM12, PABPN1, RBM41, RBM43, RBFOX3, SLTM, LARP6, TRNAU1AP, CELF6, ABT1, TIAL1, RBMX2, CPSF6, RBM39, SCAF8, ENOX1, RBM33, SRSF11, MYEF2, IGF2BP3, TNRC6C, SNRNP70, RBM28, RBM26, RBM23, RBM12B, RBM20, MTHFSD, HNRNPDL, RCAN3, RBMX, LARP4B, UPF3A, SRSF2, SRSF5, SRSF4, UPF3B, SRSF7, SRSF6, SFPQ, PSPC1, RNPC3, HNRNPH1, RBM15, RBM17	1.8976	0.00496367	Cluster4: Enrichment Score: 5.05
IPR016187:C-type lectin fold	3.89081e-05	MRC1, OLR1, ATRN, MRC2, CLEC10A, CLEC1A, ASGR2, KLRG1, CD44, CLECL1, CLEC4E, CD93, STAB1, CLEC3B, CD209, CLEC4A, SUMF1, VCAN, CLEC6A, CLEC4D, CLEC7A, PLA2R1, CLEC5A, CD302, CLEC14A	2.30679	0.0691201	Cluster5: Enrichment Score: 3.70		IPR000504:RNA recognition motif domain	6.03673e-06	RBM33, SRSF11, RBM4, RBM5, MYEF2, RBM6, IGF2BP3, RBM4B, TNRC6C, RAVER2, TIA1, TARDBP, RBMS2, SNRNP70, RBM28, RBM12, RBM26, PABPN1, RBM41, RBM23, RBM12B, RBM43, RBM20, RBFOX3, MTHFSD, HNRNPDL, RBMX, SLTM, SRSF2, TRNAU1AP, SRSF5, SRSF4, SRSF7, SRSF6, CELF6, TIAL1, SFPQ, RBMX2, PSPC1, CPSF6, RNPC3, RBM39, HNRNPH1, SCAF8, RBM15, ENOX1, RBM17	1.95374	0.0103565	Cluster4: Enrichment Score: 5.05
IPR016186:C-type lectin-like	6.08062e-05	MRC1, OLR1, MRC2, ATRN, CLEC10A, CLEC1A, ASGR2, KLRG1, CD93, CLECL1, CLEC4E, CD44, STAB1, CLEC3B, CD209, CLEC4A, CLEC6A, VCAN, CLEC7A, CLEC4D, PLA2R1, CD302, CLEC5A, CLEC14A	2.30136	0.108002	Cluster5: Enrichment Score: 3.70		SM00360:RRM	0.000141804	RBM33, SRSF11, RBM4, RBM5, MYEF2, RBM6, IGF2BP3, RBM4B, RAVER2, TIA1, TARDBP, RBMS2, SNRNP70, RBM28, RBM12, RBM26, PABPN1, RBM41, RBM23, RBM12B, RBM20, RBFOX3, MTHFSD, HNRNPDL, RBMX, SLTM, SRSF2, TRNAU1AP, SRSF5, SRSF4, SRSF7, SRSF6, CELF6, TIAL1, SFPQ, RBMX2, PSPC1, CPSF6, RNPC3, RBM39, HNRNPH1, SCAF8, RBM15, ENOX1	1.75808	0.197823	Cluster4: Enrichment Score: 5.05
IPR001304:C-type lectin	0.000101538	MRC1, OLR1, MRC2, ATRN, CLEC10A, CLEC1A, ASGR2, KLRG1, CD93, CLECL1, CLEC4E, CLEC3B, CD209, CLEC4A, CLEC6A, VCAN, CLEC4D, CLEC7A, PLA2R1, CD302, CLEC5A, CLEC14A	2.33888	0.180287	Cluster5: Enrichment Score: 3.70		IPR011333:BTB/POZ fold	0.00595256	BACH2, ZBTB10, ZBTB9, ZBTB11, ZBTB39, KCNA3, ZBTB14, KCNRG, ZBTB18, ZBTB37, RCBTB1, HIC2, RCBTB2, KLHL6, KBTBD3, PATZ1, KLHL41, KLHL20, ZBTB46, ZBTB41, ZBTB26, KCTD7, ZBTB43, BTBD8, ZBTB25, KCTD6, KLHL14, ZBTB4, KCTD18, KBTBD11, TNFAIP1	1.63826	9.73601	Cluster5: Enrichment Score: 2.02
SM00034:CLECT	0.000246535	MRC1, OLR1, MRC2, ATRN, CLEC10A, CLEC1A, ASGR2, KLRG1, CD93, CLECL1, CLEC4E, CLEC3B, CD209, CLEC4A, CLEC6A, VCAN, CLEC4D, CLEC7A, PLA2R1, CD302, CLEC5A	2.26684	0.350823	Cluster5: Enrichment Score: 3.70		IPR000210:BTB/POZ-like	0.00701146	BACH2, ZBTB10, ZBTB9, ZBTB11, ZBTB39, KCNA3, ZBTB14, KCNRG, ZBTB18, ZBTB37, RCBTB1, HIC2, RCBTB2, KLHL6, KBTBD3, PATZ1, KLHL41, KLHL20, ZBTB46, ZBTB41, ZBTB26, KCTD7, ZBTB43, BTBD8, ZBTB25, KCTD6, KLHL14, ZBTB4, KBTBD11, TNFAIP1	1.63615	11.3716	Cluster5: Enrichment Score: 2.02
IPR018378:C-type lectin, conserved site	0.00491789	MRC1, ASGR2, CLEC3B, CD209, MRC2, VCAN, CLEC6A, CLEC4D, PLA2R1, CLEC10A	2.71688	8.38822	Cluster5: Enrichment Score: 3.70		SM00225:BTB	0.0204455	BACH2, ZBTB10, ZBTB9, ZBTB11, ZBTB39, KCNA3, ZBTB14, KCNRG, ZBTB18, ZBTB37, RCBTB1, HIC2, RCBTB2, KLHL6, KBTBD3, PATZ1, KLHL41, KLHL20, ZBTB46, ZBTB41, ZBTB26, KCTD7, ZBTB43, BTBD8, ZBTB25, KCTD6, KLHL14, ZBTB4, KBTBD11, TNFAIP1	1.50327	25.0571	Cluster5: Enrichment Score: 2.02
Immunity	7.04633e-06	TNFAIP8L2, S100A8, C3, BLA-DQB, S100A9, PGLYRP1, TLR2, IFI30, HP, TLR5, NLRC4, NOD2, FCN1, PYCARD, TICAM2, LTF, NRROS, BOLA-DRA, CLEC6A, JAGN1, MR1, CFD, DBNL, BOLA, IRAK1, IL2RA, OLR1, CFB, CNPY3, ANXA1, FADD, LGALS9, S100A12, C1QA, C1QB, IRF5, BOLA-DMA, BOLA-DQA5, BOLA-DMB, CD300LG, IRF3, BOLA-DQB, CLEC7A, LOC783680, CD14	1.90585	0.00983495	Cluster6: Enrichment Score: 3.28		IPR007110:Immunoglobulin-like domain	0.0018697	FGFR2, SCN3B, TMEM81, LRIG1, ILDR2, L1CAM, KIT, LINGO2, NRCAM, CCDC141, CD96, SEMA3G, FCMR, SPEG, TEK, CD2, ACAN, CD4, TIE1, CD7, CD28, KIRREL3, LRRC4, BOLA, CRTAM, CD3G, CD3D, CD3E, LRRN2, CTLA4, CD276, PTPRS, KIR2DS1, MALT1, IGSF9B, LRRC24, SLAMF1, MXRA5, BTLA, AMIGO1, AMIGO2, NCAM2, ZPBP2, CDON, VSTM2L, CNTN2, SEMA4C, JAM2, CD200, KALRN	1.52492	3.1598	Cluster6: Enrichment Score: 1.88
Innate immunity	0.00216721	TNFAIP8L2, S100A8, C3, S100A9, TLR2, PGLYRP1, TLR5, NOD2, NLRC4, FCN1, TICAM2, PYCARD, NRROS, CLEC6A, MR1, CFD, IRAK1, CFB, ANXA1, CNPY3, FADD, S100A12, C1QA, C1QB, IRF5, IRF3, CLEC7A, CD14	1.76987	2.98292	Cluster6: Enrichment Score: 3.28		IPR013783:Immunoglobulin-like fold	0.00337125	IL9R, IL27RA, SCN3B, ILDR2, L1CAM, INSRR, NRCAM, CCDC141, CD96, SEMA3G, TRIM45, TIE1, FNDC3A, KIRREL3, LRRC4, BOLA, CRTAM, CD3G, CD3D, CD3E, RIMBP2, PTPRS, LRRC24, TMEM106C, AMIGO1, AMIGO2, NCAM2, TRIM36, ZPBP2, SEMA4C, CNTN2, JAM2, KALRN, FGFR2, CAMTA1, FSD1L, LRIG1, KIT, IL7R, MYCBP2, IL12RB2, LINGO2, SPEG, FCMR, TEK, CD2, ACAN, CD4, NFATC3, TGM7, EXOC2, CD7, CD28, LRRN2, MET, CD276, CTLA4, KIR…	1.39631	5.6291	Cluster6: Enrichment Score: 1.88
GO:0045087~innate immune response	0.00933525	TNFAIP8L2, S100A8, FGR, S100A9, PGLYRP1, TLR2, TLR5, FES, SRC, NLRC4, NOD2, TRIM8, CLEC4E, PYCARD, TICAM2, FCER1G, NRROS, CLEC6A, CLEC4D, MR1, IRAK1, HCK, RELA, CNPY3, TRIM27, ANXA1, FADD, TRIM25, MID2, S100A12, C1QA, TYK2, C1QB, CYBB, IRF5, IRF3, CLEC7A, TNK2, ABL2, CLEC5A, LOC783680, CD14, ADAM15	1.44383	16.0916	Cluster6: Enrichment Score: 3.28		IPR003598:Immunoglobulin subtype 2	0.0079694	FGFR2, LRRC4, CD3G, CD3E, LRRN2, CD276, PTPRS, LRIG1, MALT1, L1CAM, KIT, IGSF9B, LRRC24, MXRA5, NRCAM, LINGO2, NCAM2, SPEG, CDON, CNTN2, CD4, JAM2, KIRREL3, KALRN	1.74059	12.8271	Cluster6: Enrichment Score: 1.88
GO:0005509~calcium ion binding	3.32464e-07	PDP1, S100A4, S100A5, S100A8, SYT5, AIF1, S100A7, MMP8, S100A9, FAM20C, NELL2, FSTL1, EDIL3, JAG1, ITSN1, CIB2, PLS3, S100A2, TBC1D9B, RET, CAPNS1, ACTN4, CHP1, RYR1, MYL6, CRELD1, ENPP2, PAMR1, PEF1, CAPS2, LPCAT1, TTYH1, PCDHA13, SDF4, GPD2, MICU1, HPCAL1, EFEMP1, S100A11, S100A10, PCDH17, PCDH19, S100A12, NOTCH3, PLA2G4A, S100B, PDCD6, LDLR, SUSD1, NCS1, EFHD2, EFHD1, PCDH1, CD93, GSN, EEF2K, …	1.59638	0.000545557	Cluster7: Enrichment Score: 3.25		IPR013098:Immunoglobulin I-set	0.0205848	FGFR2, LRRC4, LRRN2, PTPRS, LRIG1, L1CAM, MXRA5, NRCAM, AMIGO1, LINGO2, NCAM2, SPEG, CDON, CNTN2, KIRREL3, KALRN	1.84876	30.0125	Cluster6: Enrichment Score: 1.88
domain:EF-hand 2	0.000173708	S100A4, MYL6, GPD2, MICU1, FKBP9, CAPNS1, HPCAL1, ACTN4, S100A8, S100A7, S100A9, NCS1, CHP1, FSTL1, FAM195A, CAPN2, S100A12, EFHD2, EFHD1, CALML4, S100B, PLCD1, SDF4, S100A2	2.1535	0.29898	Cluster7: Enrichment Score: 3.25		IPR003599:Immunoglobulin subtype	0.0256992	FGFR2, SCN3B, LRIG1, ILDR2, L1CAM, KIT, LINGO2, NRCAM, CD96, SPEG, FCMR, ACAN, CD4, TIE1, KIRREL3, CD7, LRRC4, CRTAM, LRRN2, CTLA4, CD276, KIR2DS1, PTPRS, MALT1, LRRC24, IGSF9B, MXRA5, AMIGO1, BTLA, NCAM2, AMIGO2, CDON, VSTM2L, SEMA4C, CNTN2, JAM2, KALRN	1.41708	36.0251	Cluster6: Enrichment Score: 1.88
domain:EF-hand 1	0.000343185	S100A4, MYL6, GPD2, MICU1, FKBP9, HPCAL1, ACTN4, S100A8, S100A7, AIF1, S100A9, NCS1, CHP1, FSTL1, FAM195A, CAPN2, S100A12, EFHD2, EFHD1, CALML4, S100B, PLCD1, SDF4, S100A2	2.07374	0.589866	Cluster7: Enrichment Score: 3.25		SM00408:IGc2	0.0265263	FGFR2, LRRC4, CD3G, CD3E, LRRN2, CD276, PTPRS, LRIG1, MALT1, L1CAM, KIT, IGSF9B, LRRC24, MXRA5, NRCAM, LINGO2, NCAM2, SPEG, CDON, CNTN2, CD4, JAM2, KIRREL3, KALRN	1.56085	31.2981	Cluster6: Enrichment Score: 1.88
IPR002048:EF-hand domain	0.000457766	MYL6, S100A4, FKBP9, S100A5, FKBP7, S100A8, TBC1D8, TBC1D9, AIF1, S100A7, S100A9, NCS1, FSTL1, ITSN1, EFHD2, PEF1, EFHD1, CAPS2, CALML4, LPCAT1, PKD2, PLCD1, CIB2, SDF4, EHD2, PLS3, EHD4, S100A2, TBC1D9B, GPD2, MICU1, HPCAL1, CAPNS1, ACTN4, S100A11, CHP1, CAPN2, S100A12, S100B, MCFD2, RYR1, PDCD6, RCN1	1.66894	0.81037	Cluster7: Enrichment Score: 3.25		SM00409:IG	0.0954302	FGFR2, SCN3B, LRIG1, ILDR2, L1CAM, KIT, LINGO2, NRCAM, CD96, SPEG, FCMR, ACAN, CD4, TIE1, KIRREL3, CD7, LRRC4, CRTAM, LRRN2, CTLA4, CD276, KIR2DS1, PTPRS, MALT1, LRRC24, IGSF9B, MXRA5, AMIGO1, BTLA, NCAM2, AMIGO2, CDON, VSTM2L, SEMA4C, CNTN2, JAM2, KALRN	1.27074	75.3515	Cluster6: Enrichment Score: 1.88
IPR011992:EF-hand-like domain	0.00251034	MYL6, S100A4, TPPP3, FKBP9, S100A5, FKBP7, S100A8, TBC1D8, TBC1D9, AIF1, S100A7, S100A9, NCS1, FSTL1, ITSN1, STAT6, EFHD2, PEF1, EFHD1, CAPS2, LPCAT1, CALML4, PKD2, PLCD1, CIB2, SDF4, EHD2, PLCB2, PLS3, EHD4, S100A2, TBC1D9B, GPD2, MICU1, HPCAL1, CAPNS1, ACTN4, S100A11, CHP1, S100A10, CAPN2, S100A12, S100B, MCFD2, RYR1, PDCD6, RCN1	1.51216	4.36839	Cluster7: Enrichment Score: 3.25		IPR018159:Spectrin/alpha-actinin	0.00508733	CCDC141, SYNE2, MACF1, MCF2, UTRN, AKAP6, ACTN1, KALRN, SPTAN1	3.06778	8.37855	Cluster7: Enrichment Score: 1.34
IPR018247:EF-Hand 1, calcium-binding site	0.0260363	S100A4, FKBP9, FKBP7, S100A5, S100A7, NCS1, ITSN1, PEF1, CAPS2, PLCD1, CIB2, SDF4, EHD2, PLS3, EHD4, S100A2, GPD2, MICU1, CAPNS1, HPCAL1, ACTN4, S100A11, CHP1, CAPN2, S100A12, S100B, MCFD2, PDCD6, RCN1	1.47731	37.4256	Cluster7: Enrichment Score: 3.25		SM00150:SPEC	0.00986285	CCDC141, SYNE2, MACF1, MCF2, UTRN, AKAP6, ACTN1, KALRN, SPTAN1	2.75099	12.925	Cluster7: Enrichment Score: 1.34
SM00054:EFh	0.028431	S100A4, MYL6, FKBP9, S100A5, S100A8, S100A7, S100A9, NCS1, ITSN1, EFHD2, EFHD1, PEF1, CALML4, CIB2, SDF4, PLS3, GPD2, MICU1, HPCAL1, ACTN4, S100A11, CHP1, S100A12, S100B, PDCD6, RCN1	1.50352	33.7087	Cluster7: Enrichment Score: 3.25		IPR002017:Spectrin repeat	0.0566001	SYNE2, MACF1, UTRN, ACTN1, KALRN, SPTAN1	2.72692	63.1987	Cluster7: Enrichment Score: 1.34
IPR000742:Epidermal growth factor-like domain	2.52176e-05	PTGS2, CRELD1, LDLR, SUSD1, NELL2, PAMR1, C1R, EDIL3, JAG1, SCARF1, CD93, FAT3, FAT1, TNR, NRG1, THBS1, PCSK6, ADAM9, VASN, NRXN2, ATRN, EFEMP1, HSPG2, VWCE, MFGE8, SLIT3, NOTCH3, LRP1, STAB1, LAMA5, TMEM8A, LRP6, VCAN, LAMC1, AREG, LRP4, VLDLR, ADAM15	1.95616	0.0448041	Cluster8: Enrichment Score: 2.92		IPR001715:Calponin homology domain	0.0942385	SPECC1L, SYNE2, MACF1, CLMN, CEP95, CAMSAP1, UTRN, MICAL3, EHBP1, ACTN1, GAS2, LRCH3	1.66954	81.698	Cluster7: Enrichment Score: 1.34
IPR013032:EGF-like, conserved site	2.76931e-05	CRELD1, LDLR, SUSD1, NELL2, PAMR1, C1R, EDIL3, JAG1, SCARF1, NAGPA, CD93, FAT3, FAT1, TNR, NRG1, THBS1, ADAM9, VASN, ATRN, EFEMP1, HSPG2, VWCE, MFGE8, SLIT3, NOTCH3, LRP1, TMEM8B, STAB1, TMEM8A, VCAN, LAMC1, AREG, LRP4, VLDLR, ADAM15	2.01369	0.0492013	Cluster8: Enrichment Score: 2.92		IPR001589:Actinin-type, actin-binding, conserved site	0.13743	SYNE2, MACF1, CLMN, UTRN, ACTN1	2.43475	92.0852	Cluster7: Enrichment Score: 1.34
SM00181:EGF	5.05043e-05	CRELD1, LDLR, SUSD1, NELL2, PAMR1, C1R, EDIL3, JAG1, SCARF1, CD93, FAT3, FAT1, TNR, NRG1, THBS1, PCSK6, VASN, NRXN2, EFEMP1, ATRN, HSPG2, VWCE, MFGE8, SLIT3, NOTCH3, LRP1, STAB1, LAMA5, LRP6, VCAN, LAMC1, LRP4, VLDLR	2.00373	0.0719619	Cluster8: Enrichment Score: 2.92		SM00033:CH	0.238671	SPECC1L, SYNE2, MACF1, CLMN, UTRN, MICAL3, EHBP1, ACTN1, GAS2, LRCH3	1.45555	97.7799	Cluster7: Enrichment Score: 1.34
EGF-like domain	0.00365431	HYAL1, LDLR, CRELD1, SUSD1, ATRN, EFEMP1, NELL2, PAMR1, VWCE, MFGE8, C1R, EDIL3, JAG1, SLIT3, NOTCH3, NAGPA, LRP1, TMEM8B, FAT3, CD93, FAT1, LRP6, VCAN, THBS1, LRP4, VLDLR	1.75602	4.98172	Cluster8: Enrichment Score: 2.92		GO:0007169~transmembrane receptor protein tyrosine kinase signaling pathway	0.0011462	ITK, STAP1, NTF3, BLK, MET, CSPG4, INSRR, FYN, TEK, LCK, ZAP70, JAK1, TXK, JAK3, YES1, TEC	2.45788	2.05649	Cluster8: Enrichment Score: 1.34
IPR001881:EGF-like calcium-binding	0.00389578	LDLR, CRELD1, SUSD1, PAMR1, EFEMP1, NELL2, HSPG2, VWCE, C1R, JAG1, EDIL3, SLIT3, NOTCH3, LRP1, CD93, FAT3, STAB1, FAT1, VCAN, THBS1, LRP4, VLDLR	1.85498	6.70151	Cluster8: Enrichment Score: 2.92		IPR020635:Tyrosine-protein kinase, catalytic domain	0.00291189	FGFR2, ITK, BLK, MET, KIT, INSRR, PTK2, FYN, LCK, TEK, ZAP70, JAK1, TXK, JAK3, TIE1, YES1, TEC	2.18668	4.88005	Cluster8: Enrichment Score: 1.35
SM00179:EGF_CA	0.00412486	LDLR, CRELD1, SUSD1, PAMR1, EFEMP1, NELL2, HSPG2, VWCE, C1R, JAG1, EDIL3, SLIT3, NOTCH3, LRP1, CD93, FAT3, STAB1, FAT1, VCAN, THBS1, LRP4, VLDLR	1.84251	5.72131	Cluster8: Enrichment Score: 2.92		SM00219:TyrKc	0.00844896	FGFR2, ITK, BLK, MET, KIT, INSRR, PTK2, FYN, LCK, TEK, ZAP70, JAK1, TXK, JAK3, TIE1, YES1, TEC	1.96087	11.1727	Cluster8: Enrichment Score: 1.36
IPR018097:EGF-like calcium-binding, conserved site	0.0090456	LDLR, CRELD1, SUSD1, EFEMP1, NELL2, VWCE, C1R, JAG1, EDIL3, SLIT3, NOTCH3, LRP1, CD93, FAT3, FAT1, VCAN, LRP4, VLDLR	1.87292	14.9115	Cluster8: Enrichment Score: 2.92		Tyrosine-protein kinase	0.00917305	FGFR2, ITK, BLK, MET, KIT, INSRR, FYN, LCK, TEK, ZAP70, JAK1, TXK, JAK3, TIE1, YES1, TEC	2.01452	11.6516	Cluster8: Enrichment Score: 1.37
IPR009030:Insulin-like growth factor binding protein, N-terminal	0.0155453	LDLR, CRELD1, IGFBP7, SUSD1, EFEMP1, NELL2, VWCE, JAG1, FURIN, SCARF1, NOTCH3, IGF1R, LRP1, CD93, RSPO1, HTRA1, PCSK6, INSR, LRP4, VLDLR	1.71593	24.3023	Cluster8: Enrichment Score: 2.92		GO:0038083~peptidyl-tyrosine autophosphorylation	0.0161619	ITK, PTK2, FYN, BLK, LCK, ZAP70, JAK1, TXK, JAK3, YES1, TEC	2.28619	25.5634	Cluster8: Enrichment Score: 1.38
IPR000152:EGF-type aspartate/asparagine hydroxylation site	0.0175282	LDLR, CRELD1, SUSD1, EFEMP1, NELL2, VWCE, C1R, JAG1, EDIL3, SLIT3, NOTCH3, LRP1, CD93, FAT3, FAT1, VCAN, LRP4, VLDLR	1.76054	26.9665	Cluster8: Enrichment Score: 2.92		IPR008266:Tyrosine-protein kinase, active site	0.0172955	FGFR2, ITK, MET, NEK10, KIT, INSRR, PTK2, FYN, LCK, TEK, ZAP70, JAK1, TXK, JAK3, TIE1, YES1, TEC	1.83959	25.8685	Cluster8: Enrichment Score: 1.39
IPR001751:S100/Calbindin-D9k, conserved site	2.2539e-05	S100A4, S100A5, S100B, S100A8, S100A7, S100A9, S100A11, S100A10, S100A12, S100A2	4.44581	0.040046	Cluster9: Enrichment Score: 2.84		GO:0004715~non-membrane spanning protein tyrosine kinase activity	0.0326286	ITK, PTK2, FYN, BLK, LCK, ZAP70, JAK1, TXK, JAK3, YES1, TEC	2.0604	40.2526	Cluster8: Enrichment Score: 1.40
IPR013787:S100/CaBP-9k-type, calcium binding, subdomain	0.000195912	S100A4, S100A5, S100B, S100A8, S100A7, S100A9, S100A11, S100A10, S100A12, S100A2	3.76184	0.347579	Cluster9: Enrichment Score: 2.84		GO:0031234~extrinsic component of cytoplasmic side of plasma membrane	0.0638308	ITK, PTK2, FYN, KCNAB1, BLK, LCK, ZAP70, JAK1, TXK, JAK3, YES1, TEC	1.78551	61.7621	Cluster8: Enrichment Score: 1.41
SM01394:SM01394	0.000204354	S100A4, S100A5, S100B, S100A8, S100A7, S100A9, S100A11, S100A10, S100A12, S100A2	3.73655	0.290881	Cluster9: Enrichment Score: 2.84		IPR001245:Serine-threonine/tyrosine-protein kinase catalytic domain	0.138751	FGFR2, ITK, BLK, MET, KIT, INSRR, TEX14, PTK2, FYN, LCK, TEK, ZAP70, JAK1, TXK, JAK3, TIE1, YES1, MAP3K13, TEC	1.37796	92.2906	Cluster8: Enrichment Score: 1.42
calcium-binding region:2; high affinity	0.00437139	S100A4, S100B, S100A8, S100A7, S100A9, S100A12, S100A2	3.62904	7.27295	Cluster9: Enrichment Score: 2.84		IPR000980:SH2 domain	0.172074	ITK, STAP1, BLK, SOCS7, SHF, CBLC, SH2D1A, PLCG1, RINL, FYN, LCK, CHN1, ZAP70, JAK1, TXK, JAK3, YES1, TEC	1.34848	96.0826	Cluster8: Enrichment Score: 1.43
calcium-binding region:1; low affinity	0.0139348	S100A4, S100B, S100A8, S100A9, S100A12, S100A2	3.49943	21.484	Cluster9: Enrichment Score: 2.84		SM00252:SH2	0.340626	ITK, STAP1, BLK, SOCS7, SHF, SH2D1A, PLCG1, FYN, LCK, CHN1, ZAP70, JAK1, TXK, JAK3, YES1, TEC	1.20757	99.7018	Cluster8: Enrichment Score: 1.44
GO:0050786~RAGE receptor binding	0.154923	S100A4, S100B, S100A8, S100A9	2.79925	93.6846	Cluster9: Enrichment Score: 2.84		GO:0042127~regulation of cell proliferation	0.355788	FGFR2, ITK, TCF7, HP1BP3, BLK, TGFB3, TNFRSF9, PTK2, CDCA7, FYN, LCK, JAK1, TXK, CFDP1, YES1, CD27, TBX19, TEC	1.17773	99.9653	Cluster8: Enrichment Score: 1.45
IPR001452:Src homology-3 domain	0.00162507	SH3RF1, SKAP2, ITSN1, MCF2L, SH3YL1, PACSIN3, PACSIN2, SH3D21, NCKIPSD, SH3GL3, SH3PXD2B, DBNL, MPP1, NCF2, BAIAP2, NCF4, MPP7, ARHGAP32, FNBP1L, SH3GL2, MAP3K11, SRGAP2, SNX9, FGR, ABI3, NEDD9, CACNB3, SRC, SORBS3, DOCK1, TRIP10, SH3TC2, NPHP1, PIK3R2, SASH1, TP53BP2, BAIAP2L1, HCK, FDPS, TRIO, MYO1F, DOCK4, SH3BP4, SH3RF3, SH3D19, SNX33, TNK2, TJP2, ABL2, ARHGAP10	1.51876	2.84885	Cluster10: Enrichment Score: 2.56		GO:0045087~innate immune response	0.584899	POLR3F, ITK, BLK, OTULIN, CRCP, MALT1, TRIM10, POLR3D, SERINC5, SH2D1A, CHGA, PTK2, FYN, GATA3, LCK, ZAP70, JAK1, TXK, JAK3, YES1, TEC	1.02341	100	Cluster8: Enrichment Score: 1.46
SM00326:SH3	0.00232821	SNX9, SH3RF1, FGR, ABI3, NEDD9, SKAP2, ITSN1, SRC, SORBS3, SH3YL1, DOCK1, PACSIN3, PACSIN2, SH3D21, NCKIPSD, SH3TC2, TRIP10, NPHP1, PIK3R2, SH3PXD2B, SH3GL3, DBNL, SASH1, MPP1, NCF2, TP53BP2, BAIAP2L1, HCK, NCF4, BAIAP2, FDPS, TRIO, MYO1F, MPP7, DOCK4, SH3BP4, ARHGAP32, FNBP1L, SH3RF3, SH3D19, SNX33, TNK2, ABL2, SH3GL2, ARHGAP10, SRGAP2, MAP3K11	1.51194	3.26779	Cluster10: Enrichment Score: 2.56		GO:0005102~receptor binding	0.625454	PTK2, CRTAM, FYN, BLK, LCK, ZAP70, JAK1, JAK3, YES1, CD200	1.05007	100	Cluster8: Enrichment Score: 1.47
SH3 domain	0.0052982	SNX9, SH3RF1, FGR, CACNB3, ITSN1, SKAP2, SRC, SH3YL1, SORBS3, PACSIN3, PACSIN2, NCKIPSD, TRIP10, SH3TC2, NPHP1, PIK3R2, SH3PXD2B, DBNL, MPP1, NCF2, TP53BP2, BAIAP2, NCF4, HCK, TRIO, MYO1F, MPP7, FNBP1L, SH3RF3, SH3D19, TNK2, ABL2, TJP2, SH3GL2, SRGAP2, ARHGAP10	1.55695	7.14675	Cluster10: Enrichment Score: 2.56		domain:EGF-like 2	0.00373911	LTBP2, TEK, FBN1, TIE1, SSPO	6.53198	5.8759	Cluster9: Enrichment Score: 1.31
Peroxisome	0.000103821	XDH, ACOX1, PAOX, PRDX5, PMVK, PHYH, ATAD1, PEX11A, FAR2, DHRS4, LONP2, PEX19, MPV17L, PXMP2, CAT, ZADH2, SCP2, HMGCL	2.61019	0.144817	Cluster11: Enrichment Score: 2.54		domain:EGF-like 1	0.0576333	LTBP2, TEK, FBN1, TIE1, SSPO	3.26599	61.6942	Cluster9: Enrichment Score: 1.31
bta04146:Peroxisome	0.00222882	XDH, ACOX1, ABCD1, PRDX5, MPV17, PMVK, PEX11G, FAR2, ACSL1, MPV17L2, PEX19, MPV17L, PXMP2, IDH1, CAT, ACSL4, ACSL6, HMGCL, ACSL5, PAOX, NUDT13, CRAT, PHYH, PEX11A, DHRS4, MLYCD, SCP2, ACAA1	1.73878	2.92119	Cluster11: Enrichment Score: 2.54		domain:EGF-like 3	0.132515	TEK, FBN1, TIE1	4.57238	89.9537	Cluster9: Enrichment Score: 1.31
short sequence motif:Microbody targeting signal	0.00437139	ACOX1, PAOX, LONP2, DHRS4, PRDX5, PMVK, SCP2	3.62904	7.27295	Cluster11: Enrichment Score: 2.54		EGF-like domain	0.195849	C7, LTBP1, LTBP2, LTBP3, FBN1, DLL1, SSPO, TENM4, FBLN2, FAT4, TEK, ACAN, EGFL8, TIE1, TLL2	1.37119	94.661	Cluster9: Enrichment Score: 1.31
GO:0005777~peroxisome	0.0681858	XDH, ACOX1, PAOX, VIM, PRDX5, CRAT, PMVK, PHYH, ATAD1, FAR2, DHRS4, CAT, ZADH2, SCP2, HMGCL, ACAA1	1.57082	65.0218	Cluster11: Enrichment Score: 2.54		*Cluster enrichment threshold was set to 1.3.
IPR000421:Coagulation factor 5/8 C-terminal type domain	0.00275409	DCBLD2, NRP2, DCBLD1, NRP1, F5, F8, CPXM2, MFGE8, EDIL3	3.14382	4.78281	Cluster12: Enrichment Score: 2.43
SM00231:FA58C	0.00285641	DCBLD2, NRP2, DCBLD1, NRP1, F5, F8, CPXM2, MFGE8, EDIL3	3.12269	3.99519	Cluster12: Enrichment Score: 2.43
IPR008979:Galactose-binding domain-like	0.00610955	DCBLD2, NRP2, DCBLD1, GLB1L, NRP1, F8, CPXM2, MFGE8, EDIL3, FURIN, NTN1, MANBA, GLB1, NGLY1, F5, HECTD3, PCSK7, LAMC1, PCSK6	1.89627	10.3184	Cluster12: Enrichment Score: 2.43
IPR013783:Immunoglobulin-like fold	2.44488e-05	ADGRA3, MPZL1, PLXNA1, CADM1, F13A1, FGFRL1, UNC5B, INSR, EBI3, PTPRK, BOLA, TYRO3, PLXNB1, PTPRG, RELA, PLXNB2, LIFR, PTPRO, SIRPA, IL11RA, VSIG2, IGSF8, BOLA-DMA, BOLA-DQA5, BOLA-DMB, NPTN, CD300LG, ROR2, PTGFRN, VSIG4, PLXNC1, BLA-DQB, HFE, FCGRT, PVRL1, ZPBP, LRFN1, PLXND1, LRFN4, LRFN3, CSF1R, FN1, FCER1A, EPM2A, TRIO, COL14A1, CD300A, CD58, MILR1, NXPE4, MERTK, LOC783680, IGFBP7, LY9, CXADR…	1.47301	0.0434384	Cluster13: Enrichment Score: 2.20
IPR007110:Immunoglobulin-like domain	7.71649e-05	ADGRA3, MPZL1, CADM1, IGFBP7, FGFRL1, LY9, CXADR, SIRPB1, UNC5B, SEMA3C, BOLA-DRA, ESAM, NRG1, FCGR3A, PILRA, C28H10ORF54, BOLA, TYRO3, PTPRK, NECTIN2, IL6R, SIRPA, IL11RA, SIGLEC1, CD86, IGSF8, VSIG2, IL18BP, BOLA-DMA, SEMA4G, BOLA-DQA5, BOLA-DMB, NPTN, CD300LG, ROR2, BOLA-DQB, VCAN, CNTN3, PTGFRN, IL12B, TREM2, VSIG4, JAM3, CD244, BLA-DQB, HFE, FCGRT, LINGO1, LINGO4, ZPBP, PVRL1, KIRREL, FCGR1A…	1.54433	0.137039	Cluster13: Enrichment Score: 2.20
IPR003599:Immunoglobulin subtype	0.00857459	ADGRA3, MPZL1, CADM1, IGFBP7, FGFRL1, LY9, CXADR, SIRPB1, UNC5B, SEMA3C, ESAM, NRG1, FCGR3A, PILRA, C28H10ORF54, TYRO3, PTPRK, NECTIN2, IL6R, SIRPA, SIGLEC1, IGSF8, VSIG2, CD86, SEMA4G, NPTN, CD300LG, ROR2, VCAN, PTGFRN, CNTN3, JAM3, CD244, LINGO1, LINGO4, PVRL1, KIRREL, FCGR1A, LRFN1, LRFN4, LRFN3, CSF1R, FCER1A, FLT3, ALPK2, HSPG2, AXL, TRIO, CD300A, PECAM1, MERTK	1.40118	14.1899	Cluster13: Enrichment Score: 2.20
SM00409:IG	0.00920177	ADGRA3, MPZL1, CADM1, IGFBP7, FGFRL1, LY9, CXADR, SIRPB1, UNC5B, SEMA3C, ESAM, NRG1, FCGR3A, PILRA, C28H10ORF54, TYRO3, PTPRK, NECTIN2, IL6R, SIRPA, SIGLEC1, IGSF8, VSIG2, CD86, SEMA4G, NPTN, CD300LG, ROR2, VCAN, PTGFRN, CNTN3, JAM3, CD244, LINGO1, LINGO4, PVRL1, KIRREL, FCGR1A, LRFN1, LRFN4, LRFN3, CSF1R, FCER1A, FLT3, ALPK2, HSPG2, AXL, TRIO, CD300A, PECAM1, MERTK	1.39176	12.3452	Cluster13: Enrichment Score: 2.20
IPR013098:Immunoglobulin I-set	0.0225661	ADGRA3, PTPRK, TYRO3, ALPK2, IGFBP7, FGFRL1, HSPG2, TRIO, SIGLEC1, LINGO1, LINGO4, UNC5B, KIRREL, SEMA3C, ROR2, CNTN3, NRG1, LRFN4, LRFN3, CSF1R	1.65776	33.343	Cluster13: Enrichment Score: 2.20
IPR003598:Immunoglobulin subtype 2	0.0342998	CADM1, FGFRL1, CXADR, LINGO1, LINGO4, PVRL1, UNC5B, KIRREL, FCGR1A, LRFN1, ESAM, NRG1, LRFN4, LRFN3, CSF1R, FCER1A, TYRO3, HSPG2, TRIO, IL6R, IL11RA, SIGLEC1, VSIG2, NPTN, ROR2, CNTN3, IL12B, JAM3	1.45671	46.2181	Cluster13: Enrichment Score: 2.20
SM00408:IGc2	0.0362698	CADM1, FGFRL1, CXADR, LINGO1, LINGO4, PVRL1, UNC5B, KIRREL, FCGR1A, LRFN1, ESAM, NRG1, LRFN4, LRFN3, CSF1R, FCER1A, TYRO3, HSPG2, TRIO, IL6R, IL11RA, SIGLEC1, VSIG2, NPTN, ROR2, CNTN3, IL12B, JAM3	1.44692	40.9377	Cluster13: Enrichment Score: 2.20
IPR013106:Immunoglobulin V-set	0.042793	MPZL1, CADM1, HSPG2, NECTIN2, CXADR, SIRPA, SIRPB1, SIGLEC1, VSIG2, IGSF8, CD86, PVRL1, CD300A, CD300LG, ESAM, VCAN, PTGFRN, VSIG4, TREM2, JAM3, C28H10ORF54, PILRA	1.51533	54.0315	Cluster13: Enrichment Score: 2.20
Immunoglobulin domain	0.0834544	ADGRA3, MPZL1, CADM1, CXADR, SIRPB1, PVRL1, KIRREL, LRFN1, SEMA3C, MR1, FCGR3A, LRFN4, LRFN3, CSF1R, TYRO3, FLT3, AXL, SIRPA, SIGLEC1, PECAM1, CD300LG, ROR2, VCAN, IL12B, MERTK, LOC783680	1.36372	70.3695	Cluster13: Enrichment Score: 2.20
Cell junction	0.000272404	DLC1, ACHE, LIMS2, KCNAB2, FERMT3, NCS1, DSTYK, GJA1, CLDN12, CXADR, NRN1, ZFYVE21, ITGB1, RABAC1, COL17A1, ITGAV, ITGB6, PAK1, SNAP25, LRFN3, SCAMP5, TBC1D2, DBNL, CTBP2, ACTN4, PICK1, GRIA3, MPP7, CTNNA1, ATAD1, GJB2, JUP, ARF1, PECAM1, CYFIP1, RAP1B, CHRNB1, RAB13, TNK2, WDR1, ADGRL3, CHRNE, DNM2, SNTA1	1.69481	0.379557	Clutster14: Enrichment Score: 2.09
GO:0030054~cell junction	0.0302419	ACHE, KCNAB2, FERMT3, NCS1, DSTYK, GJA1, IFI30, NRN1, RABAC1, SNAP25, LRFN3, SCAMP5, TBC1D2, SCAMP1, DBNL, CTBP2, PICK1, GRIA3, GID8, LDLRAD3, ATAD1, P2RX4, PSEN1, PECAM1, CYFIP1, NEU1, CHRNB1, WDR1, PERP, CHRNE, NFIA, SNTA1, DNM2	1.41742	36.6672	Clutster14: Enrichment Score: 2.09
Synapse	0.0646811	DBNL, ACHE, CTBP2, KCNAB2, PICK1, NCS1, GRIA3, NRN1, ATAD1, RABAC1, ARF1, CYFIP1, CHRNB1, CHRNE, SNAP25, LRFN3, DNM2, SCAMP5	1.53011	60.6767	Clutster14: Enrichment Score: 2.09
bta00340:Histidine metabolism	0.000557959	ALDH7A1, HNMT, ALDH1B1, CNDP2, MAOA, ALDH2, UROC1, ALDH3B1, ALDH9A1, ALDH3A2	3.29604	0.738818	Cluster15: Enrichment Score: 1.90
GO:0004029~aldehyde dehydrogenase (NAD) activity	0.000973066	ALDH1A1, ALDH7A1, ALDH1B1, ALDH2, ALDH4A1, ALDH3B1, ALDH9A1, ALDH3A2	3.91894	1.58484	Cluster15: Enrichment Score: 1.90
bta00410:beta-Alanine metabolism	0.00146787	ALDH7A1, ALDH1B1, CNDP2, MLYCD, UPB1, ALDH2, ECHS1, ABAT, DPYD, SMS, ALDH3B1, ALDH9A1, ALDH3A2	2.53196	1.93285	Cluster15: Enrichment Score: 1.90
site:Transition state stabilizer	0.00219884	ALDH1A1, ALDH7A1, ALDH1B1, ATIC, ALDH2, ALDH4A1	4.66591	3.723	Cluster15: Enrichment Score: 1.90
IPR015590:Aldehyde dehydrogenase domain	0.00441744	ALDH1A1, ALDH7A1, ALDH1B1, ALDH2, ALDH4A1, ALDH3B1, ALDH9A1, ALDH3A2	3.26026	7.56598	Cluster15: Enrichment Score: 1.90
IPR016161:Aldehyde/histidinol dehydrogenase	0.00441744	ALDH1A1, ALDH7A1, ALDH1B1, ALDH2, ALDH4A1, ALDH3B1, ALDH9A1, ALDH3A2	3.26026	7.56598	Cluster15: Enrichment Score: 1.90
IPR016162:Aldehyde dehydrogenase, N-terminal	0.00441744	ALDH1A1, ALDH7A1, ALDH1B1, ALDH2, ALDH4A1, ALDH3B1, ALDH9A1, ALDH3A2	3.26026	7.56598	Cluster15: Enrichment Score: 1.90
IPR016163:Aldehyde dehydrogenase, C-terminal	0.00441744	ALDH1A1, ALDH7A1, ALDH1B1, ALDH2, ALDH4A1, ALDH3B1, ALDH9A1, ALDH3A2	3.26026	7.56598	Cluster15: Enrichment Score: 1.90
bta00330:Arginine and proline metabolism	0.0260326	NOS1, CNDP2, MAOA, SAT2, ALDH3A2, CKB, ALDH7A1, P4HA2, ALDH1B1, P4HA1, ALDH2, ALDH4A1, SMS, OAT, ALDH9A1	1.78535	29.5646	Cluster15: Enrichment Score: 1.90
IPR016160:Aldehyde dehydrogenase, conserved site	0.0358713	ALDH1A1, ALDH2, ALDH4A1, ALDH9A1, ALDH3A2	3.49314	47.7523	Cluster15: Enrichment Score: 1.90
GO:0006068~ethanol catabolic process	0.109087	ALDH1B1, ALDH2, ALDH3B1	4.86874	88.4753	Cluster15: Enrichment Score: 1.90
bta00053:Ascorbate and aldarate metabolism	0.135456	ALDH7A1, ALDH1B1, ALDH2, ALDH9A1, ALDH3A2	2.38047	85.5423	Cluster15: Enrichment Score: 1.90
bta00280:Valine, leucine and isoleucine degradation	0.13833	ACADS, ECHS1, ACAT2, ALDH3A2, ALDH7A1, IVD, ALDH1B1, MCEE, ALDH2, AOX2, ABAT, HMGCL, ALDH9A1, ACAA1	1.46312	86.168	Cluster15: Enrichment Score: 1.90
nucleotide phosphate-binding region:NAD	0.149635	ALDH1A1, LDHA, CRYL1, ALDH7A1, CTBP2, ALDH1B1, ALDH2, ALDH4A1, GAPDH, ALDH3B1, ALDH9A1, VDAC1	1.51327	93.8809	Cluster15: Enrichment Score: 1.90
bta00380:Tryptophan metabolism	0.156549	ALDH7A1, ALDH1B1, MAOA, AOX2, ALDH2, ECHS1, CAT, ACAT2, ALDH9A1, ALDH3A2	1.58698	89.5873	Cluster15: Enrichment Score: 1.90
bta00071:Fatty acid degradation	0.00131744	ACOX1, CPT2, ACADS, ECHS1, ACAT2, ALDH3A2, CPT1A, ACADVL, ALDH7A1, ACSL1, ALDH1B1, ALDH2, ACSL4, ALDH9A1, ACSL6, ACSL5, ACAA1	2.20735	1.73637	Cluster16: Enrichment Score: 1.87
bta01212:Fatty acid metabolism	0.0277981	ACOX1, CPT2, ACADS, HACD4, ECHS1, PPT2, HACD1, PPT1, ACAT2, TECR, CPT1A, ACADVL, ACSL1, ACSL4, ACSL6, ACSL5, ACAA1	1.69401	31.2423	Cluster16: Enrichment Score: 1.87
Lipid metabolism	0.0656427	ACADVL, ACHE, CDYL, ACSL1, IVD, ACADS, ECHS1, ACACB, ACSL4, ACSL6, ACSL5	1.80344	44.4584	Cluster16: Enrichment Score: 1.87
Collagen	0.00282728	C1QA, C1QB, COL17A1, MSR1, PLOD3, FCN1, EDA, C1QC, PCOLCE, EMILIN1	2.90021	3.87489	Cluster17: Enrichment Score: 1.82
IPR008160:Collagen triple helix repeat	0.00296426	C1QA, C1QB, COL17A1, COL26A1, MSR1, COL14A1, COL7A1, FCN1, COL6A1, COL5A3, C1QC, EMILIN1	2.55151	5.1388	Cluster17: Enrichment Score: 1.82
GO:0005581~collagen trimer	0.00551532	C1QA, C1QB, COL17A1, MSR1, PLOD3, FCN1, EDA, C1QC, PCOLCE, EMILIN1	2.67258	7.89706	Cluster17: Enrichment Score: 1.82
domain:Collagen-like	0.0215905	C1QA, C1QB, MSR1, FCN1, EDA	3.88826	31.3541	Cluster17: Enrichment Score: 1.82
SM00110:C1Q	0.0931722	C1QA, C1QB, EMILIN2, C1QC, EMILIN1	2.69862	75.1925	Cluster17: Enrichment Score: 1.82
IPR001073:Complement C1q protein	0.128628	C1QA, C1QB, EMILIN2, C1QC, EMILIN1	2.4452	91.3429	Cluster17: Enrichment Score: 1.82
GO:0020037~heme binding	0.00757166	ADGB, NOS1, TBXAS1, PTGS2, CYP2S1, CYB5A, CYP20A1, CYP4V2, SRC, IKBKE, CYBB, MGC127055, CYP39A1, CYP27A1, HMOX1, SDHC, HEBP1, CAT, CYB5D2	1.8615	11.7256	Cluster18: Enrichment Score: 1.81
IPR001128:Cytochrome P450	0.0129383	TBXAS1, MGC127055, CYP39A1, CYP27A1, CYP2S1, CYP4V2, CYP20A1	3.11207	20.6597	Cluster18: Enrichment Score: 1.81
Heme	0.0182263	NOS1, TBXAS1, PTGS2, CYP2S1, CYB5A, CYP20A1, CYP4V2, CYB561, CYB561D2, CYBB, MGC127055, CYP39A1, CYP27A1, HMOX1, SDHC, CAT	1.83455	22.6441	Cluster18: Enrichment Score: 1.81
metal ion-binding site:Iron (heme axial ligand)	0.0302257	CYB561D2, CYBB, TBXAS1, PTGS2, HMOX1, SDHC, CYB5A, CAT, CYP20A1, CYB561	2.12087	41.0808	Cluster18: Enrichment Score: 1.81
Host-virus interaction	0.00328546	DYNLL1, DNAJC14, ITGAV, ITGB6, FDPS, ITGB1, CREBL2	3.83472	4.48955	Cluster19: Enrichment Score: 1.77
GO:0001618~virus receptor activity	0.00509944	HYAL1, ITGAV, ITGB6, ANPEP, ITGB1, CLEC5A	4.19887	8.04707	Cluster19: Enrichment Score: 1.77
GO:0046718~viral entry into host cell	0.0133433	VPS18, NPC1, ITGAV, ITGB6, AXL, ANPEP, CTSB, ITGB1	2.78214	22.2194	Cluster19: Enrichment Score: 1.77
Host cell receptor for virus entry	0.0282379	ITGAV, ITGB6, ANPEP, ITGB1	4.93036	32.956	Cluster19: Enrichment Score: 1.77
GO:0033627~cell adhesion mediated by integrin	0.214751	ITGAV, ITGB6, ADAM17, ITGB1	2.43437	98.9135	Cluster19: Enrichment Score: 1.77
IPR000917:Sulfatase	0.00441744	ARSB, SGSH, STS, IDS, ARSH, GALNS, ARSA, ARSK	3.26026	7.56598	Cluster20: Enrichment Score: 1.75
GO:0008484~sulfuric ester hydrolase activity	0.0113191	SGSH, STS, IDS, ARSH, GALNS, ARSK	3.67401	17.0391	Cluster20: Enrichment Score: 1.75
Inorganic ion transport and metabolism	0.0118847	ARSB, NOS1, IDS, GALNS, ARSA, ARSK, CAT, POR	2.86911	9.83671	Cluster20: Enrichment Score: 1.75
IPR024607:Sulfatase, conserved site	0.0129383	ARSB, SGSH, STS, IDS, ARSH, GALNS, ARSA	3.11207	20.6597	Cluster20: Enrichment Score: 1.75
IPR017850:Alkaline-phosphatase-like, core domain	0.0184082	ARSB, SGSH, STS, IDS, ENPP2, ARSH, GALNS, ARSA, ARSK	2.4452	28.1202	Cluster20: Enrichment Score: 1.75
IPR017849:Alkaline phosphatase-like, alpha/beta/alpha	0.0184082	ARSB, SGSH, STS, IDS, ENPP2, ARSH, GALNS, ARSA, ARSK	2.4452	28.1202	Cluster20: Enrichment Score: 1.75
GO:0008152~metabolic process	0.188722	SGSH, ARSB, STS, GSTA4, ARSH, ARSK, TKT, ACAT2, CDYL, DIP2C, IDS, GALNS, ARSA, ACSL4, AGPAT3, SCP2, ACSL5	1.33498	98.0004	Cluster20: Enrichment Score: 1.75
IPR003597:Immunoglobulin C1-set	5.18792e-05	BOLA, BLA-DQB, HFE, FCGRT, SIRPA, SIRPB1, CD1E, BOLA-DMA, BOLA-DQA5, BOLA-DMB, BOLA-DRA, BOLA-DQB, MR1, LOC783680	3.05649	0.0921532	Cluster21: Enrichment Score: 1.65
SM00407:IGc1	5.47673e-05	BOLA, BLA-DQB, HFE, FCGRT, SIRPA, SIRPB1, CD1E, BOLA-DMA, BOLA-DQA5, BOLA-DMB, BOLA-DRA, BOLA-DQB, MR1, LOC783680	3.03595	0.0780339	Cluster21: Enrichment Score: 1.65
IPR011162:MHC classes I/II-like antigen recognition protein	0.00037283	BOLA, BOLA-DMA, BOLA-DQA5, BLA-DQB, BOLA-DMB, HFE, BOLA-DRA, BOLA-DQB, FCGRT, MR1, CD1E	3.08867	0.660479	Cluster21: Enrichment Score: 1.65
IPR003006:Immunoglobulin/major histocompatibility complex, conserved site	0.000424882	BOLA, BOLA-DMA, BOLA-DQA5, BLA-DQB, BOLA-DMB, HFE, BOLA-DRA, BOLA-DQB, FCGRT, MR1, LOC783680, SIRPB1	2.88978	0.752363	Cluster21: Enrichment Score: 1.65
GO:0042613~MHC class II protein complex	0.00374643	BOLA-DMA, BOLA-DQA5, BLA-DQB, BOLA-DMB, BOLA-DRA, BOLA-DQB, CD74	3.74162	5.43001	Cluster21: Enrichment Score: 1.65
MHC II	0.0110197	BOLA-DMA, BOLA-DQA5, BLA-DQB, BOLA-DMB, BOLA-DRA, BOLA-DQB	3.69777	14.3301	Cluster21: Enrichment Score: 1.65
IPR014745:MHC class II, alpha/beta chain, N-terminal	0.011419	BOLA-DMA, BOLA-DQA5, BLA-DQB, BOLA-DMB, BOLA-DRA, BOLA-DQB	3.66779	18.4612	Cluster21: Enrichment Score: 1.65
GO:0002504~antigen processing and presentation of peptide or polysaccharide antigen via MHC class II	0.0116347	BOLA-DMA, BOLA-DQA5, BLA-DQB, BOLA-DMB, BOLA-DRA, BOLA-DQB	3.65155	19.6608	Cluster21: Enrichment Score: 1.65
bta05310:Asthma	0.0177965	FCER1A, BOLA-DMA, BOLA-DQA5, BLA-DQB, BOLA-DMB, FCER1G, BOLA-DRA, BOLA-DQB, IL10	2.41023	21.2261	Cluster21: Enrichment Score: 1.65
bta04612:Antigen processing and presentation	0.0384719	BOLA, PDIA3, LGMN, BLA-DQB, IFI30, HSPA1A, CTSS, CD74, HSPA1L, BOLA-DMA, BOLA-DQA5, TAP1, BOLA-DMB, HSPA6, BOLA-DRA, BOLA-DQB, CTSB, LOC783680	1.60682	40.6231	Cluster21: Enrichment Score: 1.65
bta05416:Viral myocarditis	0.0466942	BID, ACTB, BOLA, ITGAL, CAV1, BLA-DQB, ITGB2, CXADR, CD86, CASP9, BOLA-DMA, BOLA-DQA5, BOLA-DMB, BOLA-DRA, BOLA-DQB, ABL2	1.63232	47.0262	Cluster21: Enrichment Score: 1.65
bta05330:Allograft rejection	0.105719	BOLA, CD86, BOLA-DMA, BOLA-DQA5, BLA-DQB, BOLA-DMB, BOLA-DRA, BOLA-DQB, IL12B, IL10	1.71394	77.3408	Cluster21: Enrichment Score: 1.65
IPR001003:MHC class II, alpha chain, N-terminal	0.108219	BOLA-DMA, BOLA-DQA5, BOLA-DRA	4.89039	86.9367	Cluster21: Enrichment Score: 1.65
SM00920:SM00920	0.109465	BOLA-DMA, BOLA-DQA5, BOLA-DRA	4.85752	80.8418	Cluster21: Enrichment Score: 1.65
bta05322:Systemic lupus erythematosus	0.133612	ACTN4, C3, BLA-DQB, C1R, H2AFJ, C1QC, IL10, C1QA, C1QB, CD86, BOLA-DMA, BOLA-DQA5, FCGR1A, BOLA-DMB, BOLA-DRA, BOLA-DQB, FCGR3A	1.40082	85.1272	Cluster21: Enrichment Score: 1.65
bta05320:Autoimmune thyroid disease	0.176181	BOLA, CD86, BOLA-DMA, BOLA-DQA5, BLA-DQB, BOLA-DMB, BOLA-DRA, BOLA-DQB, IL10	1.60682	92.385	Cluster21: Enrichment Score: 1.65
bta04940:Type I diabetes mellitus	0.185697	BOLA, CD86, CPE, BOLA-DMA, BOLA-DQA5, BLA-DQB, BOLA-DMB, BOLA-DRA, BOLA-DQB, IL12B	1.5303	93.4744	Cluster21: Enrichment Score: 1.65
bta05321:Inflammatory bowel disease (IBD)	0.21072	RELA, BLA-DQB, TLR2, TLR5, IL10, STAT6, NOD2, BOLA-DMA, BOLA-DQA5, IL4R, BOLA-DMB, BOLA-DRA, BOLA-DQB, IL12B, IFNGR1	1.33902	95.6896	Cluster21: Enrichment Score: 1.65
bta04672:Intestinal immune network for IgA production	0.250202	CD86, LTBR, BOLA-DMA, BOLA-DQA5, BLA-DQB, BOLA-DMB, TNFSF13, BOLA-DRA, BOLA-DQB, IL10	1.42828	97.8203	Cluster21: Enrichment Score: 1.65
IPR000353:MHC class II, beta chain, N-terminal	0.271711	BLA-DQB, BOLA-DMB, BOLA-DQB	2.93424	99.6427	Cluster21: Enrichment Score: 1.65
SM00921:SM00921	0.274373	BLA-DQB, BOLA-DMB, BOLA-DQB	2.91451	98.9656	Cluster21: Enrichment Score: 1.65
bta05332:Graft-versus-host disease	0.277067	BOLA, CD86, BOLA-DMA, BOLA-DQA5, BLA-DQB, BOLA-DMB, BOLA-DRA, BOLA-DQB	1.49038	98.6577	Cluster21: Enrichment Score: 1.65
SM00423:PSI	0.000482693	PLXNC1, PLXNA1, PLXNB1, PLXNB2, ATRN, ITGB5, ITGB2, ITGB1, SEMA6C, SEMA4G, SEMA4F, PLXDC2, ITGB6, PTTG1IP, SEMA3C, PLXND1	2.50711	0.685807	Cluster22: Enrichment Score: 1.62
IPR016201:Plexin-like fold	0.000699943	PLXNC1, PLXNA1, PLXNB1, PLXNB2, ATRN, ITGB5, ITGB2, ITGB1, SEMA6C, SEMA4G, SEMA4F, PLXDC2, ITGB6, PTTG1IP, SEMA3C, PLXND1	2.4452	1.23658	Cluster22: Enrichment Score: 1.62
IPR002165:Plexin	0.0029977	PLXNC1, SEMA6C, SEMA4G, PLXNA1, PLXNB1, SEMA4F, PLXNB2, PLXDC2, ATRN, PLXND1	2.8767	5.19532	Cluster22: Enrichment Score: 1.62
GO:0017154~semaphorin receptor activity	0.00339378	NRP2, PLXNC1, NRP1, PLXNA1, PLXNB1, PLXNB2, PLXND1	3.81009	5.42575	Cluster22: Enrichment Score: 1.62
GO:1902287~semaphorin-plexin signaling pathway involved in axon guidance	0.0116347	PLXNC1, NRP1, PLXNA1, PLXNB1, PLXNB2, PLXND1	3.65155	19.6608	Cluster22: Enrichment Score: 1.62
IPR013548:Plexin, cytoplasmic RasGAP domain	0.0183145	PLXNC1, PLXNA1, PLXNB1, PLXNB2, PLXND1	4.07533	27.9982	Cluster22: Enrichment Score: 1.62
GO:0002116~semaphorin receptor complex	0.0194306	PLXNC1, PLXNA1, PLXNB1, PLXNB2, PLXND1	4.00888	25.3128	Cluster22: Enrichment Score: 1.62
IPR001627:Semaphorin/CD100 antigen	0.0360612	PLXNC1, SEMA6C, SEMA4G, PLXNA1, PLXNB1, SEMA4F, PLXNB2, SEMA3C, PLXND1	2.20068	47.9349	Cluster22: Enrichment Score: 1.62
SM00630:Sema	0.0372	PLXNC1, SEMA6C, SEMA4G, PLXNA1, PLXNB1, SEMA4F, PLXNB2, SEMA3C, PLXND1	2.18588	41.7451	Cluster22: Enrichment Score: 1.62
GO:0021785~branchiomotor neuron axon guidance	0.0620029	PLXNC1, NRP1, PLXNA1, PLXND1	3.89499	69.8002	Cluster22: Enrichment Score: 1.62
GO:0060666~dichotomous subdivision of terminal units involved in salivary gland branching	0.0620029	NRP1, PLXNA1, SEMA3C, PLXND1	3.89499	69.8002	Cluster22: Enrichment Score: 1.62
GO:0048841~regulation of axon extension involved in axon guidance	0.109087	PLXNC1, PLXNA1, PLXND1	4.86874	88.4753	Cluster22: Enrichment Score: 1.62
SM00429:IPT	0.305116	PLXNC1, PLXNA1, PLXNB1, PLXNB2, RELA, PLXND1	1.61917	99.4419	Cluster22: Enrichment Score: 1.62
IPR014756:Immunoglobulin E-set	0.4169	UNC119, A2M, PLXNC1, PLXNA1, PLXNB1, LY86, RELA, F13A1, PLXNB2, PRKAB1, FLNA, NPC2, TRIM3, NXPE4, PLXND1, ARHGDIA	1.15068	99.9931	Cluster22: Enrichment Score: 1.62
IPR002909:Cell surface receptor IPT/TIG	0.434106	PLXNC1, PLXNA1, PLXNB1, PLXNB2, RELA, PLXND1	1.39725	99.996	Cluster22: Enrichment Score: 1.62
Flavoprotein	0.00175858	XDH, ACOX1, D2HGDH, CYB5R1, FMO5, MTHFR, IVD, MMACHC, PNPO, QSOX2, GPD2, PAOX, NOS1, AIFM2, ACADS, MICAL2, MAOA, FDXR, POR, ACADVL, CYBB, AOX2, TXNRD3, DPYD, PCYOX1	1.86756	2.42689	Cluster23: Enrichment Score: 1.60
FAD	0.00204618	GPD2, XDH, ACOX1, PAOX, D2HGDH, CYB5R1, NOS1, AIFM2, ACADS, MICAL2, MAOA, FDXR, POR, ACADVL, FMO5, MTHFR, CYBB, IVD, MMACHC, TXNRD3, AOX2, PCYOX1, DPYD, QSOX2	1.87823	2.81854	Cluster23: Enrichment Score: 1.60
binding site:FAD	0.025889	ACADVL, XDH, ACOX1, IVD, ACADS, FDXR	3.11061	36.3708	Cluster23: Enrichment Score: 1.60
GO:0050660~flavin adenine dinucleotide binding	0.0359542	XDH, ACOX1, D2HGDH, NOS1, AIFM2, ACADS, FDXR, POR, KDM1B, ACADVL, FMO5, MTHFR, CYBB, IVD, TXNRD3, AOX2, DUS2	1.66555	45.1659	Cluster23: Enrichment Score: 1.60
nucleotide phosphate-binding region:FAD	0.0784266	ACADVL, XDH, GPD2, CYBB, CYB5R1, IVD, ACADS, FDXR, POR	1.90878	75.5296	Cluster23: Enrichment Score: 1.60
IPR023753:Pyridine nucleotide-disulphide oxidoreductase, FAD/NAD(P)-binding domain	0.129577	GPD2, SQRDL, PAOX, AIFM2, MICAL2, MAOA, FDXR, OSGIN1, KDM1B, FMO5, TXNRD3, DPYD, PCYOX1, RETSAT	1.48838	91.5089	Cluster23: Enrichment Score: 1.60
GO:0009055~electron carrier activity	0.159898	ACADVL, XDH, SDHB, ACOX1, CYBB, GLRX5, IVD, ACADS, SDHC, AOX2, TXNRD3	1.53959	94.2678	Cluster23: Enrichment Score: 1.60
IPR017853:Glycoside hydrolase, superfamily	0.00374803	HYAL1, NAGLU, GLB1L, HEXB, CHI3L1, SLC3A2, FUCA1, MANBA, GLB1, GLA, NAGA, GAA, GALC, GBA	2.28218	6.45526	Cluster24: Enrichment Score: 1.57
IPR013781:Glycoside hydrolase, catalytic domain	0.0360612	GLB1L, HEXB, CHI3L1, SLC3A2, GALC, FUCA1, MANBA, GBA, GLB1	2.20068	47.9349	Cluster24: Enrichment Score: 1.57
GO:0005975~carbohydrate metabolic process	0.143459	HYAL1, LDHA, TALDO1, GLB1L, HEXB, CHI3L1, SLC3A2, MANBA, GLB1, SIAE, AMDHD2, PGM5, CHST7, PGM1, GALC, GK5, ABO, GGTA1, GBA	1.36038	94.4793	Cluster24: Enrichment Score: 1.57
IPR023415:Low-density lipoprotein (LDL) receptor class A, conserved site	0.0103672	MAMDC4, LRP1, LDLR, LRP12, RXFP2, HSPG2, LRP6, CFI, LDLRAD3, LRP4, VLDLR	2.33888	16.9057	Cluster25: Enrichment Score: 1.52
SM00192:LDLa	0.0107757	MAMDC4, LRP1, LDLR, LRP12, RXFP2, HSPG2, LRP6, CFI, LDLRAD3, LRP4, VLDLR	2.32316	14.3092	Cluster25: Enrichment Score: 1.52
IPR002172:Low-density lipoprotein (LDL) receptor class A repeat	0.0145769	MAMDC4, LRP1, LDLR, LRP12, RXFP2, HSPG2, LRP6, CFI, LDLRAD3, LRP4, VLDLR	2.24143	22.968	Cluster25: Enrichment Score: 1.52
IPR011042:Six-bladed beta-propeller, TolB-like	0.052632	PAM, LRP1, TRIM3, NHLRC3, LDLR, LRP6, NHLRC1, APMAP, LRP4, VLDLR	1.95616	61.7422	Cluster25: Enrichment Score: 1.52
IPR000033:LDLR class B repeat	0.0914599	LRP1, LDLR, LRP6, LRP4, VLDLR	2.71688	81.8138	Cluster25: Enrichment Score: 1.52
SM00135:LY	0.0931722	LRP1, LDLR, LRP6, LRP4, VLDLR	2.69862	75.1925	Cluster25: Enrichment Score: 1.52
domain:EF-hand 2	0.000173708	S100A4, MYL6, GPD2, MICU1, FKBP9, CAPNS1, HPCAL1, ACTN4, S100A8, S100A7, S100A9, NCS1, CHP1, FSTL1, FAM195A, CAPN2, S100A12, EFHD2, EFHD1, CALML4, S100B, PLCD1, SDF4, S100A2	2.1535	0.29898	Cluster26: Enrichment Score: 1.50
domain:EF-hand 1	0.000343185	S100A4, MYL6, GPD2, MICU1, FKBP9, HPCAL1, ACTN4, S100A8, S100A7, AIF1, S100A9, NCS1, CHP1, FSTL1, FAM195A, CAPN2, S100A12, EFHD2, EFHD1, CALML4, S100B, PLCD1, SDF4, S100A2	2.07374	0.589866	Cluster26: Enrichment Score: 1.50
calcium-binding region:2	0.0436669	MICU1, FKBP9, HPCAL1, CAPNS1, ACTN4, NCS1, CHP1, FAM195A, CAPN2, EFHD2, EFHD1, PLCD1, SDF4	1.78402	53.6786	Cluster26: Enrichment Score: 1.50
calcium-binding region:1	0.0568199	MICU1, FKBP9, CAPNS1, HPCAL1, ACTN4, AIF1, NCS1, CHP1, FAM195A, CAPN2, EFHD2, EFHD1, PLCD1, SDF4	1.67494	63.5149	Cluster26: Enrichment Score: 1.50
Signal transduction mechanisms / Cytoskeleton / Cell division and chromosome partitioning / General function prediction only	0.0867495	PEF1, HPCAL1, CAPNS1, LPCAT1, NCS1, CHP1, CAPN2, RCN1	1.9959	54.4303	Cluster26: Enrichment Score: 1.50
domain:EF-hand 4	0.385023	HPCAL1, CAPNS1, CALML4, NCS1, CHP1, SDF4	1.47344	99.977	Cluster26: Enrichment Score: 1.50
domain:EF-hand 3	0.410433	HPCAL1, CAPNS1, CALML4, NCS1, CHP1, CAPN2, SDF4	1.36089	99.9889	Cluster26: Enrichment Score: 1.50
calcium-binding region:3	0.491146	HPCAL1, CAPNS1, NCS1, SDF4	1.5553	99.9991	Cluster26: Enrichment Score: 1.50
IPR011162:MHC classes I/II-like antigen recognition protein	0.00037283	BOLA, BOLA-DMA, BOLA-DQA5, BLA-DQB, BOLA-DMB, HFE, BOLA-DRA, BOLA-DQB, FCGRT, MR1, CD1E	3.08867	0.660479	Cluster27: Enrichment Score: 1.45
IPR003006:Immunoglobulin/major histocompatibility complex, conserved site	0.000424882	BOLA, BOLA-DMA, BOLA-DQA5, BLA-DQB, BOLA-DMB, HFE, BOLA-DRA, BOLA-DQB, FCGRT, MR1, LOC783680, SIRPB1	2.88978	0.752363	Cluster27: Enrichment Score: 1.45
IPR011161:MHC class I-like antigen recognition	0.0546821	BOLA, HFE, FCGRT, MR1, CD1E	2.66749	63.187	Cluster27: Enrichment Score: 1.45
MHC I	0.0599995	BOLA, MR1, LOC783680	3.94429	57.8384	Cluster27: Enrichment Score: 1.45
GO:0042612~MHC class I protein complex	0.0640123	BOLA, MR1, LOC783680	3.84852	62.6178	Cluster27: Enrichment Score: 1.45
IPR001039:MHC class I, alpha chain, alpha1/alpha2	0.104286	BOLA, HFE, MR1	3.26026	85.8741	Cluster27: Enrichment Score: 1.45
GO:0002474~antigen processing and presentation of peptide antigen via MHC class I	0.18893	BOLA, MR1	3.65155	98.01	Cluster27: Enrichment Score: 1.45
GO:0019882~antigen processing and presentation	0.25018	RAB32, BOLA, BLA-DQB, HFE, FCGRT, CTSS, MR1	1.62291	99.5419	Cluster27: Enrichment Score: 1.45
GO:0003823~antigen binding	0.455893	BOLA, HFE, FCGRT, MR1	1.63289	99.9954	Cluster27: Enrichment Score: 1.45
IPR008936:Rho GTPase activation protein	0.0113257	DLC1, PLXNC1, ABR, PLXNA1, PLXNB1, PLXNB2, IQGAP2, ARHGAP18, OCRL, STARD13, ARHGAP21, ARHGAP31, ARHGAP6, ARHGAP32, ARHGAP5, SYDE1, STARD8, CHN2, PLXND1, PIK3R2, ARHGAP10, SRGAP2	1.70776	18.3244	Cluster28: Enrichment Score: 1.43
SM00324:RhoGAP	0.0628913	DLC1, ABR, ARHGAP18, STARD13, ARHGAP21, ARHGAP31, ARHGAP32, ARHGAP6, ARHGAP5, SYDE1, STARD8, CHN2, SRGAP2, ARHGAP10, PIK3R2	1.61917	60.3804	Cluster28: Enrichment Score: 1.43
IPR000198:Rho GTPase-activating protein domain	0.0712015	DLC1, ABR, ARHGAP18, STARD13, ARHGAP21, ARHGAP31, ARHGAP32, ARHGAP6, ARHGAP5, SYDE1, STARD8, CHN2, SRGAP2, ARHGAP10, PIK3R2	1.59469	73.0883	Cluster28: Enrichment Score: 1.43
Secondary metabolites biosynthesis, transport, and catabolism	0.00136921	TBXAS1, MGC127055, CYP39A1, F5, CYP27A1, CYP2S1, CYP4V2, CYP20A1, BCO2, RETSAT	3.1879	1.17965	Cluster29: Enrichment Score: 1.42
IPR001128:Cytochrome P450	0.0129383	TBXAS1, MGC127055, CYP39A1, CYP27A1, CYP2S1, CYP4V2, CYP20A1	3.11207	20.6597	Cluster29: Enrichment Score: 1.42
IPR002401:Cytochrome P450, E-class, group I	0.0214034	TBXAS1, MGC127055, CYP27A1, CYP2S1, CYP4V2, CYP20A1	3.26026	31.9199	Cluster29: Enrichment Score: 1.42
Monooxygenase	0.0389888	FMO5, PAM, TBXAS1, MGC127055, CYP27A1, MICAL2, CYP2S1, TH, CYP4V2, CYP20A1	2.05432	42.5988	Cluster29: Enrichment Score: 1.42
IPR017972:Cytochrome P450, conserved site	0.0914599	TBXAS1, MGC127055, CYP27A1, CYP2S1, CYP4V2	2.71688	81.8138	Cluster29: Enrichment Score: 1.42
GO:0004497~monooxygenase activity	0.272401	TBXAS1, CYP27A1, CYP4V2, CYP20A1	2.17719	99.4584	Cluster29: Enrichment Score: 1.42
GO:0016705~oxidoreductase activity, acting on paired donors, with incorporation or reduction of molecular oxygen	0.272401	TBXAS1, CYP27A1, CYP4V2, CYP20A1	2.17719	99.4584	Cluster29: Enrichment Score: 1.42
IPR001019:Guanine nucleotide binding protein (G-protein), alpha subunit	0.00709923	GNA15, GNAI2, GNAQ, GNAI1, GNA11, GNA12, GNAS	3.42327	11.8922	Cluster30: Enrichment Score: 1.40
IPR011025:G protein alpha subunit, helical insertion	0.00709923	GNA15, GNAI2, GNAQ, GNAI1, GNA11, GNA12, GNAS	3.42327	11.8922	Cluster30: Enrichment Score: 1.40
SM00275:SM00275	0.00731103	GNA15, GNAI2, GNAQ, GNAI1, GNA11, GNA12, GNAS	3.40026	9.93063	Cluster30: Enrichment Score: 1.40
GO:0031683~G-protein beta/gamma-subunit complex binding	0.0599469	GNAI2, GNAI1, GNA11, GNA12, GNAS	3.06168	63.7387	Cluster30: Enrichment Score: 1.40
IPR000654:G-protein alpha subunit, group Q	0.108219	GNA15, GNAQ, GNA11	4.89039	86.9367	Cluster30: Enrichment Score: 1.40
GO:0007213~G-protein coupled acetylcholine receptor signaling pathway	0.214751	GNAI2, GNAQ, GNA11, GRK2	2.43437	98.9135	Cluster30: Enrichment Score: 1.40
GO:0060158~phospholipase C-activating dopamine receptor signaling pathway	0.273548	GNA15, GNAQ, GNA11	2.92124	99.7466	Cluster30: Enrichment Score: 1.40
IPR011029:Death-like domain	0.00610955	IRAK2, IRAK1, NOL3, CARD9, DEDD, FADD, TRADD, DAPK1, TNFRSF1A, PEA15, NOD2, NLRC4, NOD1, CASP9, UNC5B, ANK3, RIPK1, PYCARD, IGFLR1	1.89627	10.3184	Cluster31: Enrichment Score: 1.32
IPR000488:Death domain	0.0481151	IRAK2, IRAK1, TNFRSF1A, UNC5B, ANK3, RIPK1, FADD, DAPK1, TRADD	2.09588	58.3678	Cluster31: Enrichment Score: 1.32
domain:Death	0.116778	IRAK2, TNFRSF1A, FADD, TRADD	3.11061	88.2384	Cluster31: Enrichment Score: 1.32
SM00005:DEATH	0.146887	TNFRSF1A, UNC5B, ANK3, RIPK1, FADD, DAPK1, TRADD	1.88903	89.6101	Cluster31: Enrichment Score: 1.32
*Cluster enrichment threshold was set to 1.3.

## Sheet: Supplementary Table 5A
Supplementary Table 5A. (i) Top six most significant clusters		(ii) Number of genes highly expressed in the PP cows per cluster.
Cluster1: Enrichment Score: 16.18		Cluster1	Cluster2	Cluster3	Cluster4	Cluster5	Cluster6
IPR001909:Krueppel-associated box		n = 56	n = 142	n = 18	n = 61	n = 31	n = 50
IPR013087:Zinc finger C2H2-type/integrase DNA-binding domain		LOC613546 (ZNF568)	BAZ1B	ZKSCAN2	ABT1	BACH2	ACAN
IPR007087:Zinc finger, C2H2		POGK	BMI1	ZKSCAN4	ACIN1	BTBD8	AMIGO1
GO:0003676~nucleic acid binding		RBAK	CDC42BPG	ZKSCAN7	CELF6	HIC2	AMIGO2
IPR015880:Zinc finger, C2H2-like		ZFP1	CHD3	ZNF174	CHD1L	KBTBD11	BOLA
SM00349:KRAB		ZFP57	CHN1	ZNF197	CPSF6	KBTBD3	BTLA
SM00355:ZnF_C2H2		ZFP90	DGKE	ZNF202	CRCP	KCNA3	CCDC141
GO:0006355~regulation of transcription, DNA-templated		ZKSCAN2	EBF4	ZNF215	ENOX1	KCNRG	CD2
GO:0046872~metal ion binding		ZKSCAN4	EGR3	ZNF24	EXOSC10	KCTD18	CD200
		ZKSCAN7	ESR1	ZNF263	FHIT	KCTD6	CD276
Cluster2: Enrichment Score: 7.01		ZNF10	ESR2	ZNF389	GDPGP1	KCTD7	CD28
Zinc-finger		ZNF12	FAAP20	ZNF394	GUCY1B3	KLHL14	CD3D
GO:0046872~metal ion binding		ZNF135	FGD5	ZNF397	HNRNPDL	KLHL20	CD3E
Zinc		ZNF140	FOXP1	ZNF445	HNRNPH1	KLHL41	CD3G
Metal-binding		ZNF169	GATA3	ZSCAN12	IGF2BP3	KLHL6	CD4
		ZNF182	GPATCH8	ZSCAN16	LARP4B	PATZ1	CD7
Cluster3: Enrichment Score: 6.83		ZNF19	HIC2	ZSCAN2	LARP6	RCBTB1	CD96
IPR003309:Transcription regulator SCAN		ZNF197	JADE1	ZSCAN26	MTHFSD	RCBTB2	CDON
IPR008916:Retrovirus capsid, C-terminal		ZNF202	KDM5A	ZSCAN31	MYEF2	TNFAIP1	CNTN2
SM00431:SCAN		ZNF214	MDM4		NT5C3B	ZBTB10	CRTAM
		ZNF215	MID1		PABPN1	ZBTB11	CTLA4
Cluster4: Enrichment Score: 5.05		ZNF227	MKRN2		PSPC1	ZBTB14	FCMR
GO:0000166~nucleotide binding		ZNF263	MLLT6		RAVER2	ZBTB18	FGFR2
IPR012677:Nucleotide-binding, alpha-beta plait		ZNF268	MSS51		RBFOX3	ZBTB25	IGSF9B
IPR000504:RNA recognition motif domain		ZNF283	NFX1		RBM12	ZBTB26	ILDR2
SM00360:RRM		ZNF286A	NR4A2		RBM12B	ZBTB37	JAM2
		ZNF300	NR4A3		RBM15	ZBTB39	KALRN
Cluster5: Enrichment Score: 2.02		ZNF311	PHF14		RBM17	ZBTB4	KIR2DS1
IPR011333:BTB/POZ fold		ZNF331	PHF19		RBM20	ZBTB41	KIRREL3
IPR000210:BTB/POZ-like		ZNF34	PHF20		RBM23	ZBTB43	KIT
SM00225:BTB		ZNF345	PHF21B		RBM26	ZBTB46	L1CAM
		ZNF350	PIKFYVE		RBM28	ZBTB9	LINGO2
Cluster6: Enrichment Score: 1.88		ZNF354C	PLAG1		RBM33		LRIG1
IPR007110:Immunoglobulin-like domain		ZNF382	PLAGL1		RBM39		LRRC24
IPR013783:Immunoglobulin-like fold		ZNF383	PLEKHF2		RBM4		LRRC4
IPR003598:Immunoglobulin subtype 2		ZNF389	PRDM10		RBM41		LRRN2
IPR013098:Immunoglobulin I-set		ZNF394	PRKCB		RBM43		MALT1
IPR003599:Immunoglobulin subtype		ZNF432	PRKCE		RBM4B		MXRA5
SM00408:IGc2		ZNF436	PRKCH		RBM5		NCAM2
SM00409:IG		ZNF445	PRKCQ		RBM6		NRCAM
		ZNF45	PRKCZ		RBMS2		PTPRS
		ZNF514	RABGEF1		RBMX		SCN3B
		ZNF527	RASGRP1		RBMX2		SEMA3G
		ZNF554	RBAK		RCAN3		SEMA4C
		ZNF555	RBM26		RNPC3		SLAMF1
		ZNF599	RBM4		SCAF8		SPEG
		ZNF605	RBM5		SFPQ		TEK
		ZNF641	RNF144A		SLTM		TIE1
		ZNF655	RNF20		SNRNP70		TMEM81
		ZNF667	RNF207		SRSF11		VSTM2L
		ZNF688	RORA		SRSF2		ZPBP2
		ZNF713	RPAP2		SRSF4
		ZNF789	RSF1		SRSF5
		ZNF792	RUFY2		SRSF6
		ZNF793	SHPRH		SRSF7
		ZNF814	SOBP		TARDBP
		ZNF891	SPRTN		TIA1
			SRSF7		TIAL1
			TAF3		TNRC6C
			TRAF5		TRNAU1AP
			TRIM10		UPF3A
			TRIM23		UPF3B
			TRIM36
			TRIM44
			TRIM45
			TRIM52
			TRIM6
			TRIM66
			USP49
			UTRN
			YAF2
			ZBED5
			ZBTB18
			ZC3H14
			ZCCHC7
			ZFAND1
			ZFAND5
			ZFP1
			ZFP57
			ZFP90
			ZKSCAN2
			ZKSCAN4
			ZKSCAN7
			ZMYM5
			ZMYND8
			ZNF10
			ZNF12
			ZNF135
			ZNF140
			ZNF169
			ZNF174
			ZNF182
			ZNF19
			ZNF197
			ZNF202
			ZNF214
			ZNF215
			ZNF227
			ZNF24
			ZNF263
			ZNF283
			ZNF286A
			ZNF300
			ZNF311
			ZNF331
			ZNF34
			ZNF345
			ZNF350
			ZNF354C
			ZNF382
			ZNF383
			ZNF389
			ZNF394
			ZNF397
			ZNF432
			ZNF436
			ZNF445
			ZNF45
			ZNF512
			ZNF514
			ZNF527
			ZNF554
			ZNF555
			ZNF599
			ZNF605
			ZNF641
			ZNF667
			ZNF688
			ZNF713
			ZNF789
			ZNF792
			ZNF793
			ZNF891
			ZNHIT3
			ZNRF1
			ZRANB2
			ZRANB3
			ZSCAN12
			ZSCAN16
			ZSCAN2
			ZSCAN26
			ZSCAN31
			ZZZ3

## Sheet:  Supplementary Table 5B
Supplementary Table 5B. (i) Top six most significant clusters		(ii) Number of genes highly expressed in the MP>3 cows per cluster.
Cluster1:Enrichment Score: 29.73		Cluster1	Cluster2	Cluster3	Cluster4:	Cluster5	Cluster6
Membrane		n = 471	n = 435	n = 254	n = 27	n = 25	n = 45
Transmembrane helix		ABCA10	A2M	ABHD1	ACSS2	ASGR2	ANXA1
Transmembrane		ABCA3	ABCA10	ABHD6	ADPGK	ATRN	BLA-DQB
GO:0016021~integral component of membrane		ABCA5	ACE	ACP2	ALDH1B1	CD209	BOLA
		ABCA6	ACHE	ACVR1	ALDH2	CD302	BOLA-DMA
Cluster2: Enrichment Score: 19.87		ABHD1	ACP2	ACVR2A	ALDH3A2	CD44	BOLA-DMB
Signal		ABHD6	ACPT	ACVR2B	ALDH3B1	CD93	BOLA-DQA5
Disulfide bond		ACE	ACRBP	ADGRL3	ALDH7A1	CLEC10A	BOLA-DQB
Glycoprotein		ACER3	ACVR1	ADRB2	ALDH9A1	CLEC14A	BOLA-DRA
signal peptide		ACP2	ACVR1B	ADRB3	ALDOA	CLEC1A	C1QA
glycosylation site:N-linked (GlcNAc...)		ACSL4	ACVR2A	ANPEP	ALDOC	CLEC3B	C1QB
disulfide bond		ACSL5	ACVR2B	APMAP	ENO1	CLEC4A	C3
		ACSL6	ACVRL1	APP	ENO3	CLEC4D	CD14
Cluster3: Enrichment Score: 7.32		ACVRL1	ADAM15	AQP1	G6PC3	CLEC4E	CD300LG
transmembrane region		ADAM9	ADAM17	ARL6IP5	GALM	CLEC5A	CFB
topological domain:Cytoplasmic		ADI1	ADAMTS2	ASPH	GAPDH	CLEC6A	CFD
topological domain:Extracellular		ADIPOR1	ADCK1	ATG9A	HK1	CLEC7A	CLEC6A
		ADORA2A	ADGRL3	ATP1A1	HK2	CLECL1	CLEC7A
Cluster4: Enrichment Score: 3.94		ADRB3	ADM	ATP1B3	LDHA	KLRG1	CNPY3
bta00010:Glycolysis / Gluconeogenesis		ADTRP	ADPGK	ATP6AP1	PCK2	MRC1	DBNL
Glycolysis		AGPAT3	ANG2	ATP6V0A1	PFKM	MRC2	FADD
GO:0006096~glycolytic process		AIF1	ANGPT4	ATP6V0B	PGAM1	OLR1	FCN1
bta01200:Carbon metabolism		AIFM2	ANGPTL2	ATP6V0E1	PGK1	PLA2R1	HP
bta01230:Biosynthesis of amino acids		AIG1	ANGPTL6	BACE1	PGM1	STAB1	IFI30
		ANKLE2	APLP1	BAX	PGM2	SUMF1	IL2RA
Cluster5: Enrichment Score: 3.70		ANPEP	APP	BLA-DQB	PKLR	VCAN	IRAK1
IPR016187:C-type lectin fold		AP2A1	AREG	BNIP3L	PKM		IRF3
IPR016186:C-type lectin-like		AP2A2	ARSA	BRI3	TPI1		IRF5
IPR001304:C-type lectin		AP2M1	ARSB	C18H19ORF12			JAGN1
SM00034:CLECT		AP2S1	ARSK	C19H17ORF62			LGALS9
IPR018378:C-type lectin, conserved site		APLP1	ART3	C3H1ORF43			LOC783680
		APLP2	ASAH1	CALCRL			LTF
Cluster6: Enrichment Score: 3.28		APMAP	ASIP	CAV1			MR1
Immunity		APP	ATP6AP1	CD151			NLRC4
Innate immunity		AREG	AXL	CD163			NOD2
GO:0045087~innate immune response		ARF1	B3GNT3	CD36			NRROS
		ARFGAP3	B9D1	CD44			OLR1
		ARHGAP10	BACE1	CD63			PGLYRP1
		ARL4A	BACE2	CD81			PYCARD
		ARL6IP5	BAMBI	CD9			S100A12
		ARSH	BLA-DQB	CERS2			S100A8
		ATP10D	BOLA	CHPT1			S100A9
		ATP11A	BOLA-DMA	CHRNB1			TICAM2
		ATP6V0A1	BOLA-DMB	CHRNE			TLR2
		ATP6V0B	BOLA-DQA5	CISD2			TLR5
		ATP6V0D1	BOLA-DQB	CLCN7			TNFAIP8L2
		ATP6V0E1	BOLA-DRA	CLDN12
		ATP7A	BPI	CLEC1A
		ATRN	BRB	CLEC7A
		AXL	BRINP1	CNPPD1
		BACE1	C15H11ORF94	COL17A1
		BACE2	C1QA	COX7A1
		BAIAP2	C1QB	CREB3
		BAX	C1R	CRELD1
		BCL2L2	C28H10ORF54	CX3CR1
		BDKRB1	C29H11ORF24	CXADR
		BFSP2	C3	CXCL16
		BLOC1S1	C3H1ORF54	CYB561
		BMPR1B	CADM1	CYB561D2
		BMPR2	CALCRL	CYB5A
		BOLA-DMA	CCL3	CYB5R1
		BOLA-DMB	CD14	CYBB
		BOLA-DQA5	CD163	CYP20A1
		BOLA-DQB	CD164L2	DGAT1
		BOLA-DRA	CD1E	DGAT2L6
		BPI	CD244	DHRS7B
		BRI3	CD300A	DNAJB12
		C13H20ORF24	CD300LG	DNAJC14
		C18H19ORF12	CD302	DPM3
		C29H11ORF24	CD34	DSE
		C2CD2	CD44	ECE1
		C2CD2L	CD59	EDA
		C3AR1	CD5L	EMC3
		C3H1ORF43	CD86	EMP3
		CACHD1	CD93	ERLIN2
		CADM1	CD99	EXT1
		CARD19	CDH10	F2RL2
		CAV1	CFB	FADS6
		CCR2	CFD	FAM195A
		CCR6	CFI	FAM234A
		CD14	CFP	FAR2
		CD151	CHI3L1	FCER1G
		CD163	CHRNB1	FCGR3A
		CD1E	CHRNE	FDFT1
		CD302	CLEC14A	FURIN
		CD34	CLEC3B	FUT10
		CD36	CNPY3	FUT4
		CD44	CNPY4	FXYD6
		CD58	COASY	G6PC3
		CD63	COL26A1	GALNT1
		CD74	COL5A3	GGCX
		CD81	COL6A1	GGTA1
		CD86	COL7A1	GJA1
		CD9	COLGALT1	GJB2
		CD93	CPE	GLMP
		CD99	CPM	GPAM
		CDC42EP2	CREG1	GPBAR1
		CDH10	CREG2	GPR108
		CERS2	CRELD1	GPR68
		CHP1	CRISP3	GRINA
		CHPT1	CRTAP	HACD4
		CHST12	CSF1R	IER3IP1
		CLCN5	CST3	IGF1R
		CLCN7	CTSA	IKBIP
		CLEC10A	CTSB	IL2RA
		CLEC14A	CTSC	IMPAD1
		CLECL1	CTSD	INSIG1
		CLTA	CTSF	ITGAL
		CNNM4	CTSH	ITGAV
		CNPPD1	CTSS	ITGB1
		COG4	CTSZ	ITGB2
		COG7	CUTA	ITGB5
		COG8	CXADR	ITGB6
		COMTD1	CXCL16	ITM2B
		COQ4	CXCL2	JAGN1
		CORO1A	CYP2S1	KDELR1
		COX7A1	DMKN	KDELR2
		CSF1R	DNAJC25	KDSR
		CTNNA1	DNASE1L1	LAMP1
		CXCL16	DNASE1L3	LAPTM4A
		CYB561	DPP7	LAPTM4B
		CYB561D2	DSE	LAPTM5
		CYBB	DSEL	LDLR
		CYP20A1	EBI3	LFNG
		CYP39A1	ECM1	LHFPL4
		CYP4V2	EDEM2	LMF2
		CYTH2	EDIL3	LPAR5
		DBNL	EFEMP1	LPCAT3
		DCBLD1	EFNB1	LRRC25
		DCBLD2	EIF2AK3	LTB4R
		DCTN2	ELFN2	M6PR
		DCUN1D3	EMILIN1	MAOA
		DGAT1	EMILIN2	MBOAT7
		DGAT2L6	ENG	MFSD1
		DLC1	ENPP2	MFSD10
		DNAJB12	ERAP1	MFSD13A
		DNAJC5	ESAM	MFSD5
		DSE	F2RL2	MGST2
		DSEL	F5	MGST3
		DSTYK	F8	MICU1
		EDA	FAM171A1	MMP14
		EFHD1	FAM210B	MOGAT1
		EFHD2	FAT1	MPV17
		ELMO2	FAT3	MPV17L
		EMP1	FCER1A	MPV17L2
		EMP3	FCER1G	MPZL1
		ERGIC1	FCGR1A	MSR1
		EXT1	FCGR3A	NAGPA
		F2RL2	FCGRT	NDUFB1
		FAM171A1	FCN1	NRROS
		FAM210B	FKBP7	OLR1
		FCGR1A	FKBP9	OXA1L
		FCGR3A	FLT3	P2RX4
		FDFT1	FMOD	P2RY1
		FMO5	FN1	PAM
		FOLH1B	FOLR2	PECAM1
		FOLR3	FOLR3	PEX11A
		FURIN	FSTL1	PIGL
		FUT4	FUCA1	PKD2
		FUT7	FURIN	PLA2R1
		FXYD5	FXYD5	PLP2
		FXYD6	FXYD6	PMEL
		G6PC3	FZD4	PNPLA2
		GAA	FZD7	PPM1L
		GABBR2	GAA	PSEN1
		GBA	GALNS	PSEN2
		GBP6	GALNT2	PSENEN
		GDAP1	GAS1	PXMP2
		GGCX	GBA	QPCTL
		GJA1	GDF1	RABAC1
		GJB2	GDF9	RNASEK
		GLG1	GGH	RNF128
		GLMP	GLB1	ROM1
		GNA11	GLB1L	RTN3
		GNAI1	GLG1	SAYSD1
		GNGT2	GLMP	SCAMP5
		GPR108	GM2A	SCARB1
		GPR132	GNAS	SDHC
		GPR146	GNPTG	SEC11A
		GPR157	GPC1	SERAC1
		GPRC5B	GPR108	SHISA5
		GRB14	GPRC5B	SIRPA
		GRIA3	GRN	SLC11A1
		GRINA	GRO1	SLC16A13
		GRK2	GSN	SLC1A5
		GUCY2C	GUCY2C	SLC25A11
		HACD1	GZMA	SLC25A35
		HACD4	HEPH	SLC25A38
		HEPH	HEXB	SLC26A2
		HFE	HFE	SLC27A1
		HGSNAT	HGF	SLC35A2
		HPCAL1	HP	SLC35A4
		IER3IP1	HSCB	SLC37A2
		IGFLR1	HTRA1	SLC38A7
		IGSF8	HYAL1	SLC39A1
		IKBIP	IDS	SLC39A11
		IKBKB	IFI30	SLC39A13
		IL10RA	IFNGR1	SLC43A3
		IL11RA	IGF1	SLC46A1
		IL17RA	IGFBP7	SLC6A6
		IL17RC	IGFLR1	SLC6A8
		IL2RA	IGSF8	SPNS1
		IL6R	IL10	SPTSSA
		ISG12(B)	IL10RA	STX5
		ITGAL	IL11RA	STX8
		ITGAM	IL12B	SYNGR2
		ITGAV	IL17RA	TBXAS1
		ITGB1	IL17RC	TECR
		ITGB2	IL18BP	TIMM21
		ITGB5	IL27	TLR2
		ITGB6	IL2RA	TM2D2
		ITPRIPL1	IL4R	TM9SF1
		JAGN1	IL6R	TM9SF4
		JUP	INSL6	TMED1
		KCNAB2	INSR	TMED5
		KCNK9	ITGAL	TMED9
		KDELR1	ITGAM	TMEM101
		KDELR2	ITGAV	TMEM106A
		KLRG1	ITGB1	TMEM129
		KXD1	ITGB2	TMEM141
		LAMP1	ITGB5	TMEM150B
		LAMP2	ITGB6	TMEM169
		LAMTOR1	JAG1	TMEM182
		LAMTOR2	JAM3	TMEM184B
		LAMTOR3	KDSR	TMEM184C
		LAPTM4A	KIAA1644	TMEM187
		LAPTM4B	LAMA5	TMEM205
		LDLR	LAMC1	TMEM218
		LDLRAD3	LAMP1	TMEM219
		LFNG	LAMP2	TMEM223
		LHFPL2	LAT2	TMEM248
		LHFPL4	LCN2	TMEM254
		LIFR	LDLR	TMEM256
		LIMS2	LDLRAD3	TMEM268
		LMF2	LGALS3BP	TMEM38B
		LOC618733	LGMN	TMEM53
		LPAR5	LGR6	TMEM8B
		LPCAT3	LINGO1	TMX1
		LRP1	LINGO4	TNFRSF1A
		LRP4	LIPA	TSPAN11
		LRP6	LOC783680	TSPAN31
		LRRC25	LPL	TSPAN33
		LRRC8E	LRFN1	TSPO
		LTB4R	LRFN3	TTYH1
		LY9	LRFN4	TYROBP
		MAMDC4	LRG1	VAPB
		MANSC1	LRP1	VDAC1
		MAOA	LRP12	VKORC1
		MBOAT7	LRP4	VTI1B
		MCOLN1	LRPAP1	ZDHHC16
		MED28	LRRC25	ZDHHC20
		METTL7A	LTBR	ZDHHC21
		MFGE8	LTF	ZDHHC4
		MFN2	LY86	ZDHHC9
		MFSD13A	LY9	ZFPL1
		MILR1	LYNX1
		MMP14	LYPD3
		MOGAT1	LYZ
		MPDU1	LYZ2
		MPV17	M6PR
		MPV17L	MAMDC4
		MPZL1	MAN2B1
		MR1	MANBA
		MS4A7	MANSC1
		MSN	MCFD2
		MTCH1	MESDC2
		MTM1	METRNL
		MTUS1	MFGE8
		NEU1	MILR1
		NFAM1	MLEC
		NFE2L1	MMP14
		NPC1	MMP19
		NPTN	MMP8
		NRG1	MPZL1
		NRN1	MR1
		NRP1	MRC1
		NRP2	MSMB
		OLR1	NAAA
		ORAI1	NAGA
		OSTM1	NAGLU
		OXA1L	NAGPA
		P2RX4	NAPSA
		P2RX7	NCSTN
		P2RY1	NECTIN2
		P2RY2	NELL2
		P2RY6	NEU1
		P4HB	NOTCH3
		PARP16	NPC1
		PCDH1	NPC2
		PCDH7	NPTN
		PCDHA13	NRN1
		PECAM1	NRP1
		PEX11A	NRP2
		PEX11G	NRROS
		PEX19	NRXN2
		PICK1	NTN1
		PILRA	OAF
		PKD2	OLFM1
		PLA2G16	OS9
		PLA2R1	OSTM1
		PLXDC2	P4HA1
		PLXNA1	P4HA2
		PLXNB1	P4HB
		PLXNB2	PAM
		PLXNC1	PAMR1
		PLXND1	PCDH17
		PNPLA2	PCDH19
		PNPLA6	PCDH7
		PODXL	PCDHA13
		PREB	PCOLCE
		PRKCA	PCYOX1
		PRRG4	PDIA3
		PSENEN	PDIA5
		PTGER1	PECAM1
		PTGS2	PGLYRP1
		PTPRG	PILRA
		PTPRK	PLA2G12A
		PTPRO	PLA2G7
		PTTG1IP	PLA2R1
		PVRL1	PLAGL2
		RAB13	PLBD1
		RAB1B	PLEKHH3
		RAB5C	PLOD1
		RAB7B	PLOD3
		RAP1B	PLTP
		RELT	PLXDC2
		RHBDD3	PLXNA1
		RNF112	PLXNB1
		RNF128	PLXNB2
		RNF130	PLXNC1
		RNF185	PMEL
		ROM1	PPT1
		ROR2	PPT2
		RYR1	PRRG4
		SCN1A	PRSS57
		SCN9A	PSAP
		SDC3	PTGFRN
		SDC4	PTGS2
		SDHB	PTPRK
		SDHC	PTTG1IP
		SEC11A	PYY
		SELENBP1	QKI
		SEMA4F	QSOX2
		SEMA4G	RAMP2
		SEMA6C	RARRES1
		SERAC1	RCN1
		SGMS2	RECK
		SGPP1	RELT
		SIRPA	RET
		SIRPB1	RETN
		SLC11A1	RETSAT
		SLC13A3	RNASE13
		SLC16A5	RNASE4
		SLC16A7	RNASE6
		SLC18B1	RNF128
		SLC1A5	RNF130
		SLC22A18	RNF43
		SLC22A4	ROR2
		SLC25A11	RSPO1
		SLC25A20	RSPRY1
		SLC25A35	SCARB2
		SLC25A38	SCARF1
		SLC25A43	SCPEP1
		SLC25A51	SCRG1
		SLC26A2	SDC4
		SLC26A6	SDF2
		SLC31A2	SDF4
		SLC35A2	SEMA3C
		SLC35A4	SEMA4F
		SLC35E1	SEMA4G
		SLC35E4	SEMA6C
		SLC35F6	SGSH
		SLC35G1	SH3GL3
		SLC37A2	SHISA5
		SLC37A4	SIAE
		SLC39A1	SIGLEC1
		SLC39A11	SIRPA
		SLC39A13	SIRPB1
		SLC39A2	SLC1A5
		SLC39A8	SLC27A1
		SLC3A2	SLC35F6
		SLC43A3	SLC39A8
		SLC52A2	SLC52A2
		SLC5A6	SLC8B1
		SLC8B1	SLC9A3
		SLC9A3	SORT1
		SLCO2B1	SPRN
		SNAP25	STAB1
		SNAP29	STS
		SNTA1	SUMF1
		SNX10	TBL2
		SNX19	TCN2
		SNX24	TGFBI
		SNX33	THBS1
		SNX9	TIMP2
		SORT1	TLR2
		SPNS1	TLR5
		SPRN	TM2D2
		SPRY1	TM9SF1
		SPTSSA	TM9SF4
		SRD5A3	TMED1
		ST6GALNAC4	TMED3
		STAB1	TMED5
		STEAP3	TMED9
		STX18	TMEM109
		STXBP6	TMEM132A
		TAP1	TMEM182
		TEX2	TMEM219
		TICAM2	TMEM256
		TIMM21	TMEM259
		TM2D2	TMEM8A
		TMBIM1	TMX1
		TMC1	TMX4
		TMCO4	TNFRSF12A
		TMED1	TNFRSF19
		TMED3	TNFRSF1A
		TMED5	TNFRSF1B
		TMED9	TNFRSF4
		TMEM101	TNFRSF6B
		TMEM104	TNR
		TMEM106A	TP53I13
		TMEM109	TPP1
		TMEM129	TREM2
		TMEM132A	TXNDC12
		TMEM141	TXNDC16
		TMEM150B	TYRO3
		TMEM169	TYROBP
		TMEM181	UNC5B
		TMEM182	VASN
		TMEM187	VCAN
		TMEM255A	VLDLR
		TMEM38B	VNN1
		TMEM51	VSIG2
		TMEM53	VSIG4
		TMEM55B	VWCE
		TMEM63A	XPNPEP2
		TMEM63B
		TMEM8A
		TMEM8B
		TMTC1
		TMTC4
		TMX1
		TMX4
		TNFRSF4
		TNFRSF8
		TNFSF4
		TNFSF8
		TP53I13
		TPCN1
		TPCN2
		TSPO
		TTYH1
		TTYH2
		TTYH3
		TYRO3
		TYROBP
		UBXN8
		VAC14
		VANGL1
		VDAC1
		VKORC1
		VLDLR
		VNN1
		VTI1B
		YIPF3
		YKT6
		ZDHHC15
		ZDHHC16
		ZDHHC20
		ZDHHC21
		ZDHHC9
		ZFPL1

## Sheet:  Supplementary Table 6
Supplementary Table 6. RNA concentration measured with Nanodrop, Bioanalyzer, and RIN values.
Sample	Nanodrop	nanodrop (260/280)	Bioanalyzer	RIN
Blood010001	38.02	2.19	44	9.5
Blood010002	52.994	1.9	65	10
Blood010003	117.964	1.99	162	9.6
Blood010004	113.32	2.17	153	10
Blood010005	93.7	2.16	105	9.5
Blood010006	82.62	2.21	104	9.5
Blood010007	122.786	2.08	187	10
Blood010008	107.64	2.1	165	9.7
Blood010009	74.167	1.93	88	9.9
Blood010010	133.63	2.13	174	9.5
Blood010011	83.62	2.2	106	9.9
Blood010012	82.052	1.99	102	9.6
Blood010013	122.58	2.07	169	9.9
Blood010014	116.317	2.03	150	9.5
Blood010015	100.883	2.08	133	9.9
Blood010016	117.555	2.02	144	9.8
Blood010017	128.328	2.07	148	9.4
Blood010018	125.24	2.17	158	9.6
Blood010019	68.73	2.21	145	9.8
Blood010020	122.09	2.12	151	9.8
Blood010021	116.117	2.02	146	9.8
Blood010022	90.76	2.13	114	9.7
Blood010023	121.61	2.06	155	9.8
Blood010024	95.853	2.02	119	9.6
Blood010025	125.291	2.05	186	9.9
Blood010026	109.03	2.16	135	9.6
Blood010027	97.72	2.15	110	9.3
Blood010028	120.76	2.15	149	9.8
Blood010029	108.58	2.16	143	9.6
Blood010030	133.82	2.16	156	9.6
Blood010031	118.24	2.09	169	9.6
Blood010032	111.2	2.15	123	9.5
Blood010033	134.28	2.15	192	9.8
Blood010034	138.21	2.17	167	9.8
Blood010035	148.74	2.15	194	9.7
Blood010036	135.94	2.1	175	9.6
Blood010037	154.793	2.08	216	9.7
Blood010038	142.36	2.14	297	9.8
Blood020001	107.75	2.09	154	9.4
Blood020003	97.25	2.1	114	9.3
Blood020005	92.85	2.08	128	9.2
Blood020007	78.25	2.1	106	9.1
Blood020009	93.46	2.11	99	9.4
Blood020011	95.58	2.06	105	9.2
Blood020013	107.89	2.02	149	9
Blood020015	106.09	2.07	113	9
Blood020017	107.21	2.1	121	9.2
Blood020019	108.92	2.1	105	9
Blood020021	122.61	2.09	157	9.3
Blood020023	94.92	2.08	124	9.5
Blood020025	85.28	2.15	84	8.9
Blood020028	118.33	2.13	170	9.5
Blood020029	80.88	2.08	77	9.2
Blood020031	110.02	2.09	161	9.7
Blood020033	100.69	2.13	134	9.3
Blood020035	105.96	2.09	131	9.4
Blood020037	136.46	2.1	123	8.9
Blood020039	126.27	2.13	107	8.9
Blood020041	105.73	2.13	96	9.1
Blood020043	112.53	2.1	123	9.2
Blood020045	110.28	2.09	123	9.4
Blood020047	94.79	2.13	110	9.7
Blood020049	116.95	2.09	183	9.3
Blood020051	112.43	2.1	154	9.5
Blood020053	112.27	2.09	193	9.7
Blood020055	80.69	2.09	132	9.5
Blood020057	124.28	2.08	186	9.5
Blood020059	138.32	2.09	210	9
Blood020061	145.78	2.07	221	9.4
Blood020063	71.41	2.09	101	9.6
Blood020065	121.68	2.14	157	9
Blood020067	137.65	2.11	159	9.2
Blood020069	105.74	2.09	174	9.4
Blood020071	129.21	2.09	200	8.7
Blood020073	169.43	2.06	231	9.3
Blood020075	116.12	2.07	160	9.6
Blood020077	82.69	2.07	96	9.7
Blood020079	88.07	2.08	121	9.5
Blood020081	74.47	2.08	88	9.7
Blood020083	126.42	2.07	190	9.7
Blood020085	144.115	2.07	211	9.2
Blood020087	120.03	2.07	174	9.7
Blood020089	143.875	2.13	266	9.5
Blood020091	148.69	2.12	180	9.1
Blood020093	122.775	2.12	149	9.1
Blood020095	139.03	2.11	204	9.8
Blood020097	173.65	2.01	207	9.4
Blood020099	151.865	2.12	188	9
Blood020101	125.935	2.1	150	8.9
Blood020103	159.89	2.12	179	9.9
Blood020105	162.8	2.1	174	9.2
Blood020107	164.47	2.11	189	9.1
Blood020109	118.53	2.08	117	9.8
Blood020111	77.36	2.14	75	9.1
Blood020113	102	2.11	120	9.4
Blood020115	169.88	2.12	269	9.1
Blood020117	164.065	2.1	180	9.1
Blood020119	168.1	2.12	188	8.9
Blood020121	89.83	2.12	90	9.2
Blood020123	83.39	2.1	88	8.8
Blood030001	141.48	2.11	168	7.7
Blood030003	66.302	2	65	9.3
Blood030004	104.967	2.04	168	9.2
Blood030005	115.925	2.06	115	8.9
Blood030006	140.616	2.06	135	8.5
Blood030007	138.703	2.03	148	8.5
Blood030008	136.581	2.08	148	8
Blood030009	164.443	2.04	181	7.4
Blood030010	235.754	2.05	284	8
Blood030011	120.538	2.06	129	8.6
Blood030013	116.57	2.1	171	8.2
Blood030014	132.78	2.07	195	8.4
Blood030015	74.99	2.06	91	8.2
Blood030017	127.04	2.11	171	8.1
Blood030018	147.38	2.16	222	8
Blood030019	150.35	2.13	250	8.4
Blood030020	120.197	2.07	178	8.2
Blood030021	129.136	2.13	210	7.7
Blood030026	127.7	2.11	109	8.5
Blood030028	120.28	2.09	102	8.3
Blood030030	78.76	2.08	74	8.8
Blood030033	162.05	2.09	161	8.6
Blood030035	122.63	2.09	121	8
Blood030042	121.099	2.09	178	8.3
Blood030043	118.3	2.12	156	8.7
Blood030046	168.99	2.11	231	8.4
Blood030047	167.59	2.09	243	8.7
Blood030048	113.49	2.09	183	8.7
Blood030049	127.362	2.07	168	8.6
Blood030051	115.367	2.11	100	8.7
Blood030052	190.52	2.09	194	8.7
Blood030054	174.836	2.09	164	6.1
Blood030055	92.83	2.13	96	9.3
Blood030057	118.32	2.08	117	9.4
Blood040002	98.042	2.03	131	9.8
Blood040003	147.324	2.01	191	9.3
Blood040004	93.557	2.25	125	9.7
Blood040007	97.444	1.98	155	8.7
Blood040009	86.96	2.1	109	9.5
Blood040010	94.437	2	158	8.7
Blood040012	88.569	1.96	111	9.4
Blood040014	104.85	2.19	166	8.7
Blood040016	127.79	2.07	163	9.4
Blood040017	135.741	2.08	164	9.6
Blood040018	119.86	2.33	188	8.8
Blood040020	104.534	1.69	141	9.4
Blood040021	131.802	2.16	141	9.5
Blood040022	121.512	2.05	169	9.6
Blood040023	114.367	2	117	9.5
Blood040024	98.605	1.99	104	9.4
Blood040025	153.695	2.08	227	9.7
Blood040027	91.476	1.86	151	8.8
Blood040028	108.002	2.1	185	8.9
Blood040029	77.864	2.17	127	8.6
Blood050001	110.77	2.06	80	9.8
Blood050003	56.031	1.96	57	9.8
Blood050005	102.1	2.1	117	9.8
Blood050007	73.055	2.01	94	9.8
Blood050009	95.825	2.03	116	9.9
Blood050011	92.194	2	108	9.9
Blood050013	89.967	2.05	110	10
Blood050015	81.46	2.07	90	9.6
Blood050017	129.755	2.07	166	9.7
Blood050019	111.502	2.06	115	9.7
Blood050021	121.515	2.01	115	9.9
Blood050023	112.693	2.03	104	9.7
Blood050025	116.34	2.05	171	9.6
Blood050027	120.034	2.04	127	9.7
Blood050029	82.117	2.02	68	9.8
Blood050031	113.875	2.03	154	10
Blood050033	92.897	2.1	135	9.7
Blood050035	67.094	2.01	171	9.6
Blood050037	108.464	2.04	125	9.9
Blood050041	119.781	1.99	155	9.9
Blood050043	134.988	2.07	200	10
Blood050045	101.389	2.05	85	10
Blood050047	126.673	2.11	162	9.8
Blood050049	95.423	2.04	129	9.9
Blood050051	82.596	2.02	98	9.9
Blood050053	52.942	1.94	63	10
Blood050055	97.32	2.01	169	10
Blood050057	53.722	1.97	155	9.7
Blood050059	98.349	2.05	90	9.6
Blood050061	80.407	2.05	104	9.8
Blood060001	185.358	1.95	255	8.8
Blood060003	120.059	2.08	153	9.4
Blood060005	104.506	1.91	135	9.9
Blood060007	139.319	2.19	177	9.3
Blood060009	111.481	1.9	221	9.1
Blood060011	139.397	1.69	190	8.9
Blood060013	149.468	1.92	186	9.3
Blood060015	200.381	2	225	9
Blood060017	178.003	1.98	184	9.1
Blood060019	137.258	1.97	134	9.5
Blood060021	165.25	1.96	156	9.2
Blood060023	129.466	1.91	118	9.4
Blood060025	201.945	1.96	332	9.3
Blood060027	168.579	2.02	254	8.8
Blood060029	150.267	1.99	228	8.8
Blood060031	111.339	1.86	140	9.2
Blood060033	101.274	1.9	180	9.1
Blood060035	158.352	2.02	140	9.2
Blood060037	136.687	2	226	9.1
Blood060039	82.254	1.7	112	9.2
Blood060041	139.288	2.08	186	9.1
Blood060043	170.888	2.01	144	9.1
Blood060045	143.757	1.88	119	9
Blood060047	97.275	1.87	127	9.1
Blood060049	131.652	2.01	210	9.2
Blood060051	122.18	1.9	177	9.1
Blood060053	107.229	1.98	74	9.2
Blood060055	86.148	1.85	118	9
Blood060057	90.25	2.04	103	9
Blood060059	141.692	1.95	182	9
Blood060061	108.567	1.88	121	8.9
Blood060063	101.856	1.94	121	8.9
Blood060065	59.315	1.78	66	9.1
Blood060067	69.466	2.04	78	8.9
Blood060069	32.718	1.99	38	9.1
Blood060071	30.196	1.58	37	8.9
Blood060073	21.89	1.46	23	9.3
Blood060075	45.215	2.15	55	9.2
Blood060077	56.461	1.93	74	9.3
Blood060079	56.157	1.65	85	9.3
Blood060081	54.183	2.05	60	8.9
Blood060083	71.668	1.9	101	8.8
Blood060085	68.726	1.85	77	9.4
Blood060087	78.127	2.07	92	9.2
Blood060089	37.193	1.3	45	9.1
Mean	113.912	2.0479	145.013	9.25895
Maximum	235.754	2.33	332	10
Minimum	21.89	1.3	23	6.1
